# Supplementary material for: Genomic analysis reveals convergent signatures of selection for milk traits in sheep and goats
Source: Research Square preprint supplement (doi:10.21203/rs.3.rs-7731967/v1), 2025-10-27
Supplement: Supplementary file 1 [file 5f459ce2a4fa08e23e6c15b3.xlsx]

## Sheet: Table S1
Table S1. WGS data information
Goats									Sheeps
Individual name	Breed	No. SRA	Sequencing depth	Comparison rate	Region	Continent	Type		Individual name	Breed	No. SRA	Sequencing depth	Comparison rate	Region	Continent	Type
ALP1	New Zealand Alpine	CRR576039	30.36	0.9992	New Zealand	Oceania	dairy		ALS1	Altay Sheep	SRR11657487	30.25	0.9985	Xinjiang, China	Asia	non-dairy
ALP2	New Zealand Alpine	CRR576041	31.74	0.9991	New Zealand	Oceania	dairy		ALS2	Altay Sheep	SRR11657488	28.7	0.9986	Xinjiang, China	Asia	non-dairy
ALP3	New Zealand Alpine	CRR576042	32.48	0.999	New Zealand	Oceania	dairy		ALS3	Altay Sheep	SRR11657489	28.77	0.9985	Xinjiang, China	Asia	non-dairy
ALP4	Australian Alpine	CRR576057	36.38	0.9991	Australia	Oceania	dairy		ALS4	Altay Sheep	SRR11657490	29.25	0.9984	Xinjiang, China	Asia	non-dairy
ALP5	Australian Alpine	CRR576058	29.54	0.9991	Australia	Oceania	dairy		ALS5	Altay Sheep	SRR11657491	28.79	0.9986	Xinjiang, China	Asia	non-dairy
ALP6	Australian Alpine	ERR2309108	10.52	0.9984	Australia	Oceania	dairy		ALS6	Altay Sheep	SRR11657492	29.3	0.9991	Xinjiang, China	Asia	non-dairy
ALP7	Australian Alpine	ERR2309109	11.12	0.9985	Australia	Oceania	dairy		ALS7	Altay Sheep	SRR11657493	29.13	0.999	Xinjiang, China	Asia	non-dairy
ALP8	Australian Alpine	ERR2309110	10.82	0.9967	Australia	Oceania	dairy		ALS8	Altay Sheep	SRR11657494	33.62	0.9991	Xinjiang, China	Asia	non-dairy
ALP9	Australian Alpine	ERR2309111	11.18	0.9976	Australia	Oceania	dairy		ALS9	Altay Sheep	SRR11657495	30.34	0.9989	Xinjiang, China	Asia	non-dairy
ALP10	Australian Alpine	ERR2309112	12.28	0.9972	Australia	Oceania	dairy		ALS10	Altay Sheep	SRR11657496	29.11	0.999	Xinjiang, China	Asia	non-dairy
APP1	Appenzell Goat	ERR2214950	24.62	0.9989	Switzerland	Europe	dairy		AWA1	Awassi Sheep	SRR11657624	23	0.9993	Iraq	Middle East	dairy
APP2	Appenzell Goat	SRR8442876	28.66	0.998	Switzerland	Europe	dairy		DMAN1	D'man	ERR232486	13.94	0.9985	Morocco	Africa	non-dairy
APP3	Appenzell Goat	SRR8442877	33.88	0.998	Switzerland	Europe	dairy		DMAN2	D'man	ERR234306	14.88	0.9991	Morocco	Africa	non-dairy
APP4	Appenzell Goat	SRR8442878	26.98	0.998	Switzerland	Europe	dairy		DMAN3	D'man	ERR277066	11.55	0.9991	Morocco	Africa	non-dairy
APP5	Appenzell Goat	SRR8442879	23.24	0.9978	Switzerland	Europe	dairy		DMAN4	D'man	ERR277067	14.47	0.9991	Morocco	Africa	non-dairy
APP6	Appenzell Goat	SRR8442880	29.24	0.9979	Switzerland	Europe	dairy		DMAN5	D'man	ERR277069	16.49	0.9992	Morocco	Africa	non-dairy
APP7	Appenzell Goat	SRR8442881	23.96	0.997	Switzerland	Europe	dairy		DMAN6	D'man	ERR277070	15.79	0.999	Morocco	Africa	non-dairy
APP8	Appenzell Goat	SRR8442912	19.74	0.9984	Switzerland	Europe	dairy		DMAN7	D'man	ERR277071	12.95	0.9992	Morocco	Africa	non-dairy
APP9	Appenzell Goat	SRR8442972	21.72	0.9976	Switzerland	Europe	dairy		DMAN8	D'man	ERR283423	16.1	0.9992	Morocco	Africa	non-dairy
APP10	Appenzell Goat	SRR8442974	30.84	0.9979	Switzerland	Europe	dairy		DMAN9	D'man	ERR283427	14.99	0.9992	Morocco	Africa	non-dairy
BOO1	Booted Goat	SRR8442885	23.8	0.9987	Switzerland	Europe	non-dairy		DMAN10	D'man	ERR283428	15.03	0.9991	Morocco	Africa	non-dairy
BOO2	Booted Goat	SRR8442886	20.96	0.9986	Switzerland	Europe	non-dairy		DMAN11	D'man	ERR299278	12.4	0.9992	Morocco	Africa	non-dairy
BOO3	Booted Goat	SRR8442887	23.06	0.9988	Switzerland	Europe	non-dairy		DMAN12	D'man	ERR318760	13.93	0.999	Morocco	Africa	non-dairy
BOO4	Booted Goat	SRR8442890	27.14	0.9987	Switzerland	Europe	non-dairy		DMAN13	D'man	ERR318762	12.47	0.9992	Morocco	Africa	non-dairy
BOO5	Booted Goat	SRR8442911	19.64	0.9986	Switzerland	Europe	non-dairy		DMAN14	D'man	ERR318766	14.17	0.9991	Morocco	Africa	non-dairy
BOO6	Booted Goat	SRR8442922	18.68	0.9987	Switzerland	Europe	non-dairy		DMAN15	D'man	ERR318773	14.01	0.9992	Morocco	Africa	non-dairy
BOO7	Booted Goat	SRR8442949	23.78	0.9959	Switzerland	Europe	non-dairy		DMAN16	D'man	ERR318774	9.97	0.9991	Morocco	Africa	non-dairy
BOO8	Booted Goat	SRR8442950	17.22	0.9987	Switzerland	Europe	non-dairy		DMAN17	D'man	ERR318897	13.38	0.9992	Morocco	Africa	non-dairy
BOO9	Booted Goat	SRR8442951	19.52	0.9978	Switzerland	Europe	non-dairy		DMAN18	D'man	ERR318899	14.53	0.999	Morocco	Africa	non-dairy
BOO10	Booted Goat	SRR8442952	23.56	0.9988	Switzerland	Europe	non-dairy		DMAN19	D'man	ERR318900	10.86	0.9993	Morocco	Africa	non-dairy
BOO11	Booted Goat	SRR8442953	18.24	0.9986	Switzerland	Europe	non-dairy		DMAN20	D'man	ERR318901	13.18	0.9991	Morocco	Africa	non-dairy
BOO12	Booted Goat	SRR8442967	16.82	0.9985	Switzerland	Europe	non-dairy		DMAN21	D'man	ERR318903	12.66	0.9991	Morocco	Africa	non-dairy
GRI1	Grisons Striped	SRR8442927	35.22	0.998	Switzerland	Europe	non-dairy		DMAN22	D'man	ERR318904	15.32	0.9993	Morocco	Africa	non-dairy
GRI2	Grisons Striped	SRR8442931	27.96	0.9981	Switzerland	Europe	non-dairy		DMAN23	D'man	ERR318905	11.7	0.9991	Morocco	Africa	non-dairy
GRI3	Grisons Striped	SRR8442932	26.96	0.9979	Switzerland	Europe	non-dairy		DMAN24	D'man	ERR318917	13.74	0.9993	Morocco	Africa	non-dairy
GRI4	Grisons Striped	SRR8442970	24.98	0.9978	Switzerland	Europe	non-dairy		DMAN25	D'man	ERR332586	13.41	0.9992	Morocco	Africa	non-dairy
GRI5	Grisons Striped	SRR8442971	24.06	0.9976	Switzerland	Europe	non-dairy		DMS1	Dairy Meade sheep	SRR22824118	16.58	0.997	New Zealand	Oceania	dairy
GRI6	Grisons Striped	SRR8442976	34.9	0.9988	Switzerland	Europe	non-dairy		DMS2	Dairy Meade sheep	SRR22824119	14.71	0.9983	New Zealand	Oceania	dairy
GRI7	Grisons Striped	SRR8442977	19.06	0.9978	Switzerland	Europe	non-dairy		DMS3	Dairy Meade sheep	SRR22824120	11.07	0.9984	New Zealand	Oceania	dairy
GRI8	Grisons Striped	SRR8442978	21.4	0.9958	Switzerland	Europe	non-dairy		DMS4	Dairy Meade sheep	SRR22824121	15.68	0.9984	New Zealand	Oceania	dairy
GRI9	Grisons Striped	SRR8442979	20.02	0.9986	Switzerland	Europe	non-dairy		DMS5	Dairy Meade sheep	SRR22824122	13.09	0.9982	New Zealand	Oceania	dairy
GRI10	Grisons Striped	SRR8442980	22.48	0.998	Switzerland	Europe	non-dairy		DMS6	Dairy Meade sheep	SRR22824124	15.24	0.9974	New Zealand	Oceania	dairy
GRI11	Grisons Striped	SRR8442981	25.8	0.9974	Switzerland	Europe	non-dairy		DMS7	Dairy Meade sheep	SRR22824135	18.58	0.9977	New Zealand	Oceania	dairy
GRI12	Grisons Striped	SRR8442984	35.5	0.9969	Switzerland	Europe	non-dairy		DMS8	Dairy Meade sheep	SRR22824146	14.15	0.9985	New Zealand	Oceania	dairy
GRI13	Grisons Striped	SRR8442985	25.34	0.9953	Switzerland	Europe	non-dairy		DMS9	Dairy Meade sheep	SRR22824156	11.78	0.9984	New Zealand	Oceania	dairy
GRI14	Grisons Striped	SRR8442986	32.84	0.9982	Switzerland	Europe	non-dairy		DMS10	Dairy Meade sheep	SRR22824157	16.46	0.9964	New Zealand	Oceania	dairy
GS1	Guishan	CRR576011	33.12	0.9988	China	Asia	non-dairy		DMS11	Dairy Meade sheep	SRR22824158	15.19	0.9979	New Zealand	Oceania	dairy
GS2	Guishan	CRR576012	34.78	0.9986	China	Asia	non-dairy		DMS12	Dairy Meade sheep	SRR8859400	14.02	0.9987	New Zealand	Oceania	dairy
GS3	Guishan	CRR576013	34.86	0.9986	China	Asia	non-dairy		DMS13	Dairy Meade sheep	SRR8859401	15.42	0.9984	New Zealand	Oceania	dairy
GS4	Guishan	CRR576014	30.86	0.9988	China	Asia	non-dairy		DMS14	Dairy Meade sheep	SRR8859402	17.38	0.9987	New Zealand	Oceania	dairy
GS5	Guishan	CRR576015	32.42	0.9988	China	Asia	non-dairy		DMS15	Dairy Meade sheep	SRR8859403	14.35	0.9983	New Zealand	Oceania	dairy
GS6	Guishan	CRR576016	34.24	0.9987	China	Asia	non-dairy		DMS16	Dairy Meade sheep	SRR8859404	16.51	0.9986	New Zealand	Oceania	dairy
GZ1	Guanzhong dairy	CRR576051	30.38	0.999	China	Asia	dairy		DMS17	Dairy Meade sheep	SRR8859405	16.81	0.9984	New Zealand	Oceania	dairy
GZ2	Guanzhong dairy	CRR576052	32.52	0.999	China	Asia	dairy		DMS18	Dairy Meade sheep	SRR8859406	14.25	0.9986	New Zealand	Oceania	dairy
GZ3	Guanzhong dairy	CRR576053	32.26	0.999	China	Asia	dairy		DMS19	Dairy Meade sheep	SRR8859407	34.61	0.9985	New Zealand	Oceania	dairy
GZ4	Guanzhong dairy	CRR576054	36.22	0.9991	China	Asia	dairy		DMS20	Dairy Meade sheep	SRR8859408	13.25	0.9989	New Zealand	Oceania	dairy
GZ5	Guanzhong dairy	CRR576055	31.84	0.9991	China	Asia	dairy		EFR1	East Friesian Dairy	SRR11657476	30.48	0.9991	Germany	Europe	dairy
GZ6	Guanzhong dairy	CRR576056	35.68	0.9991	China	Asia	dairy		EFR2	East Friesian Dairy	SRR11657477	29.07	0.9986	Germany	Europe	dairy
GZ7	Guanzhong goat	SRR20216602	10.26	0.9994	China	Asia	dairy		EFR3	East Friesian Dairy	SRR11657478	32.18	0.9973	Germany	Europe	dairy
GZ8	Guanzhong goat	SRR20216604	11.72	0.9992	China	Asia	dairy		EFR4	East Friesian Dairy	SRR11657479	28.98	0.9988	Germany	Europe	dairy
GZ9	Guanzhong goat	SRR20216605	10.42	0.9993	China	Asia	dairy		EFR5	East Friesian Dairy	SRR11657480	28.97	0.9986	Germany	Europe	dairy
GZ10	Guanzhong goat	SRR20216606	10.42	0.9993	China	Asia	dairy		EFR6	East Friesian Dairy	SRR11657481	29.35	0.9988	Germany	Europe	dairy
GZ11	Guanzhong goat	SRR20216608	10.84	0.9993	China	Asia	dairy		EFR7	East Friesian Dairy	SRR11657482	29.89	0.9985	Germany	Europe	dairy
GZ12	Guanzhong goat	SRR20216616	10.5	0.9992	China	Asia	dairy		EFR8	East Friesian Dairy	SRR11657483	30.35	0.9981	Germany	Europe	dairy
GZ13	Guanzhong goat	SRR20216617	10.26	0.9992	China	Asia	dairy		EFR9	East Friesian Dairy	SRR11657484	31.11	0.997	Germany	Europe	dairy
GZ14	Guanzhong goat	SRR20216619	10.22	0.9992	China	Asia	dairy		EFR10	East Friesian Dairy	SRR11657485	30.84	0.999	Germany	Europe	dairy
LON1	Longlin goat	SRR11744807	12.98	0.9956	China	Asia	non-dairy		EFR11	East Friesian Dairy	SRR8859389	34.84	0.9983	Germany	Europe	dairy
LON2	Longlin goat	SRR11744808	14.74	0.9978	China	Asia	non-dairy		EFR12	East Friesian Dairy	SRR8859392	32.79	0.9985	Germany	Europe	dairy
LON3	Longlin goat	SRR11744809	11.48	0.9976	China	Asia	non-dairy		FIN1	Finnsheep	SRR11657543	33	0.9989	Finland	Europe	non-dairy
LON4	Longlin goat	SRR11744810	11.76	0.9982	China	Asia	non-dairy		FIN2	Finnsheep	SRR11657544	29.32	0.9989	Finland	Europe	non-dairy
LON5	Longlin goat	SRR11744811	16.54	0.9985	China	Asia	non-dairy		FIN3	Finnsheep	SRR11657545	31.01	0.9989	Finland	Europe	non-dairy
LON6	Longlin goat	SRR11744812	13.42	0.9985	China	Asia	non-dairy		FIN4	Finnsheep	SRR11657546	33.26	0.9992	Finland	Europe	non-dairy
LON7	Longlin goat	SRR11744813	12.72	0.9982	China	Asia	non-dairy		FIN5	Finnsheep	SRR11657547	33.32	0.9991	Finland	Europe	non-dairy
LON8	Longlin goat	SRR11744814	14.48	0.9974	China	Asia	non-dairy		FIN6	Finnsheep	SRR11657548	28.65	0.999	Finland	Europe	non-dairy
LON9	Longlin goat	SRR11744815	10.68	0.9987	China	Asia	non-dairy		FIN7	Finnsheep	SRR11657549	35.29	0.999	Finland	Europe	non-dairy
LON10	Longlin goat	SRR11744816	10.7	0.9987	China	Asia	non-dairy		FIN8	Finnsheep	SRR11657550	29.82	0.999	Finland	Europe	non-dairy
LON11	Longlin goat	SRR11744817	11.42	0.9976	China	Asia	non-dairy		FIN9	Finnsheep	SRR11657551	31.11	0.9992	Finland	Europe	non-dairy
LON12	Longlin goat	SRR11744818	14.3	0.9969	China	Asia	non-dairy		FIN10	Finnsheep	SRR11657552	31.27	0.9991	Finland	Europe	non-dairy
LON13	Longlin goat	SRR11744819	18.24	0.9983	China	Asia	non-dairy		HUS1	Hu Sheep	SRR11657579	28.98	0.9988	Jiangsu, China	Asia	non-dairy
LON14	Longlin goat	SRR11744820	12.1	0.9969	China	Asia	non-dairy		HUS2	Hu Sheep	SRR11657580	28.97	0.9986	Jiangsu, China	Asia	non-dairy
LON15	Longlin goat	SRR11744821	12.9	0.9981	China	Asia	non-dairy		HUS3	Hu Sheep	SRR11657581	29.35	0.9988	Jiangsu, China	Asia	non-dairy
LS1	Laoshan dairy	SRR3565902	22.62	0.9963	China	Asia	dairy		HUS4	Hu Sheep	SRR11657582	29.89	0.9985	Jiangsu, China	Asia	non-dairy
LS2	Laoshan dairy	SRR3565904	23.68	0.9943	China	Asia	dairy		HUS5	Hu Sheep	SRR11657583	30.35	0.9981	Jiangsu, China	Asia	non-dairy
NUB1	Chinese Nubian	CRR576023	36.26	0.9991	China	Asia	dairy		HUS6	Hu Sheep	SRR11657683	29.16	0.9989	Jiangsu, China	Asia	non-dairy
NUB2	Chinese Nubian	CRR576024	37.66	0.999	China	Asia	dairy		HUS7	Hu Sheep	SRR11657684	31.11	0.997	Jiangsu, China	Asia	non-dairy
NUB3	Chinese Nubian	CRR576025	42.64	0.9989	China	Asia	dairy		HUS8	Hu Sheep	SRR11657685	28.47	0.9988	Jiangsu, China	Asia	non-dairy
NUB4	Chinese Nubian	CRR576026	29.46	0.999	China	Asia	dairy		HUS9	Hu Sheep	SRR11657686	29.18	0.999	Jiangsu, China	Asia	non-dairy
NUB5	Chinese Nubian	CRR576027	37.18	0.9991	China	Asia	dairy		HUS10	Hu Sheep	SRR11657687	29.43	0.9991	Jiangsu, China	Asia	non-dairy
NUB6	Chinese Nubian	CRR576028	33.64	0.9991	China	Asia	dairy		STHS1	Small-tailed Han	SRR11657475	32.73	0.9973	Shandong, China	Asia	non-dairy
NUB7	Australian Nubian	ERR2309113	11.88	0.998	Australia	Oceania	dairy		STHS2	Small-tailed Han	SRR11657486	31.84	0.9981	Shandong, China	Asia	non-dairy
NUB8	Australian Nubian	ERR2309114	11.72	0.9976	Australia	Oceania	dairy		STHS3	Small-tailed Han	SRR11657497	29.23	0.9984	Shandong, China	Asia	non-dairy
NUB9	Australian Nubian	ERR2309115	12.08	0.9974	Australia	Oceania	dairy		STHS4	Small-tailed Han	SRR11657572	31.6	0.9986	Shandong, China	Asia	non-dairy
NUB10	Australian Nubian	ERR2309116	11.3	0.9979	Australia	Oceania	dairy		STHS5	Small-tailed Han	SRR11657529	32.2	0.9989	Shandong, China	Asia	non-dairy
NUB11	Australian Nubian	ERR2309117	10.68	0.9977	Australia	Oceania	dairy		STHS6	Small-tailed Han	SRR11657578	32.18	0.9973	Shandong, China	Asia	non-dairy
NUB12	Chinese Nubian	SRR8224116	14.96	0.998	China	Asia	dairy		STHS7	Small-tailed Han	SRR11657584	31.11	0.997	Shandong, China	Asia	non-dairy
NUB13	Chinese Nubian	SRR8224118	15.2	0.9984	China	Asia	dairy		STHS8	Small-tailed Han	SRR11657603	31.39	0.9974	Shandong, China	Asia	non-dairy
NUB14	Chinese Nubian	SRR8224126	11	0.9989	China	Asia	dairy		STHS9	Small-tailed Han	SRR11657681	31.87	0.9974	Shandong, China	Asia	non-dairy
NUB15	Chinese Nubian	SRR8224129	12.38	0.998	China	Asia	dairy		STHS10	Small-tailed Han	SRR11657682	28.67	0.9972	Shandong, China	Asia	non-dairy
PEA1	Peacock Goat	ERR2214963	26.7	0.9988	Switzerland	Europe	dairy		TAN1	Tan Sheep	SRR11657463	28.57	0.9986	Ningxia, China	Asia	non-dairy
PEA2	Peacock Goat	SRR8437779	20.98	0.9989	Switzerland	Europe	dairy		TAN2	Tan Sheep	SRR11657464	29.2	0.9988	Ningxia, China	Asia	non-dairy
PEA3	Peacock Goat	SRR8442892	22.24	0.9978	Switzerland	Europe	dairy		TAN3	Tan Sheep	SRR11657465	30.53	0.9987	Ningxia, China	Asia	non-dairy
PEA4	Peacock Goat	SRR8442895	35.08	0.998	Switzerland	Europe	dairy		TAN4	Tan Sheep	SRR11657573	30.04	0.9991	Ningxia, China	Asia	non-dairy
PEA5	Peacock Goat	SRR8442896	27.56	0.9979	Switzerland	Europe	dairy		TAN5	Tan Sheep	SRR11657574	28.16	0.999	Ningxia, China	Asia	non-dairy
PEA6	Peacock Goat	SRR8442897	24.42	0.9976	Switzerland	Europe	dairy		TAN6	Tan Sheep	SRR11657575	28.67	0.999	Ningxia, China	Asia	non-dairy
PEA7	Peacock Goat	SRR8442898	23.36	0.998	Switzerland	Europe	dairy		TAN7	Tan Sheep	SRR11657576	30.48	0.9991	Ningxia, China	Asia	non-dairy
PEA8	Peacock Goat	SRR8442899	25.42	0.9976	Switzerland	Europe	dairy		TAN8	Tan Sheep	SRR11657577	29.07	0.9986	Ningxia, China	Asia	non-dairy
PEA9	Peacock Goat	SRR8442901	22.54	0.9986	Switzerland	Europe	dairy		TAN9	Tan Sheep	SRR11657688	28.19	0.9989	Ningxia, China	Asia	non-dairy
PEA10	Peacock Goat	SRR8442954	19.6	0.9986	Switzerland	Europe	dairy		TAN10	Tan Sheep	SRR11657689	30.27	0.9988	Ningxia, China	Asia	non-dairy
PEA11	Peacock Goat	SRR8442957	18.08	0.9988	Switzerland	Europe	dairy
PEA12	Peacock Goat	SRR8442958	28.74	0.998	Switzerland	Europe	dairy
PEA13	Peacock Goat	SRR8442959	32.52	0.9978	Switzerland	Europe	dairy
PEA14	Peacock Goat	SRR8442961	28.74	0.9979	Switzerland	Europe	dairy
PEA15	Peacock Goat	SRR8442963	22.88	0.998	Switzerland	Europe	dairy
PEA16	Peacock Goat	SRR8442966	21.54	0.9945	Switzerland	Europe	dairy
SAN1	New Zealand Saanen	CRR576035	34.7	0.999	New Zealand	Oceania	dairy
SAN2	New Zealand Saanen	CRR576036	30.52	0.9991	New Zealand	Oceania	dairy
SAN3	New Zealand Saanen	CRR576037	30.94	0.9992	New Zealand	Oceania	dairy
SAN4	New Zealand Saanen	CRR576038	42.26	0.9991	New Zealand	Oceania	dairy
SAN5	Australian Saanen	CRR576040	36.42	0.9991	Australia	Oceania	dairy
SAN6	Australian Saanen	CRR576043	30.14	0.9989	Australia	Oceania	dairy
SAN7	New Zealand Saanen	CRR576044	35.18	0.9991	New Zealand	Oceania	dairy
SAN8	New Zealand Saanen	CRR576045	36.42	0.999	New Zealand	Oceania	dairy
SAN9	New Zealand Saanen	CRR576046	37.32	0.9991	New Zealand	Oceania	dairy
SAN10	Australian Saanen	CRR576040	34.52	0.9991	Australia	Oceania	dairy
SAN11	Australian Saanen	CRR576048	32.76	0.9991	Australia	Oceania	dairy
SAN12	Australian Saanen	CRR576049	33.12	0.999	Australia	Oceania	dairy
SAN13	Australian Saanen	CRR576050	32.58	0.9991	Australia	Oceania	dairy
SAN14	Saanen Goat	ERR2214964	22.46	0.9975	Switzerland	Europe	dairy
SAN15	Australian Saanen	ERR2309106	11.06	0.9978	Australia	Oceania	dairy
SAN16	Australian Saanen	ERR2309107	10.58	0.9965	Australia	Oceania	dairy
SAN17	Korean Saanen	ERR2309125	13	0.9992	Korea	Asia	dairy
SAN18	Korean Saanen	ERR2309126	12.4	0.9992	Korea	Asia	dairy
SAN19	Korean Saanen	ERR2309127	13.48	0.9992	Korea	Asia	dairy
SAN20	Korean Saanen	ERR2309128	11.8	0.9992	Korea	Asia	dairy
SAN21	Korean Saanen	ERR2309129	12.28	0.9992	Korea	Asia	dairy
SAN22	Korean Saanen	ERR2309130	12.16	0.9992	Korea	Asia	dairy
SAN23	Korean Saanen	ERR2309131	12.1	0.9993	Korea	Asia	dairy
SAN24	Korean Saanen	ERR2309132	11.66	0.9993	Korea	Asia	dairy
SAN25	Korean Saanen	ERR2309133	12.38	0.9991	Korea	Asia	dairy
SAN26	Saanen Goat	SRR11076271	21.22	0.9992	Switzerland	Europe	dairy
SAN27	Saanen Goat	SRR11076276	21.66	0.9962	Switzerland	Europe	dairy
SAN28	Saanen Goat	SRR11076279	23.94	0.9993	Switzerland	Europe	dairy
SAN29	Saanen Goat	SRR11076280	17.8	0.9961	Switzerland	Europe	dairy
SAN30	Saanen Goat	SRR11076281	17.16	0.9993	Switzerland	Europe	dairy
SAN31	Saanen Goat	SRR6246095	35.34	0.9983	Switzerland	Europe	dairy
SAN32	Saanen Goat	SRR6246097	32.72	0.9984	Switzerland	Europe	dairy
SAN33	Saanen Goat	SRR6246098	36.68	0.998	Switzerland	Europe	dairy
SAN34	Saanen Goat	SRR6246100	32.44	0.9989	Switzerland	Europe	dairy
TOG1	Toggenburg	CRR576029	35.46	0.9991	Switzerland	Europe	dairy
TOG2	Toggenburg	CRR576030	33.34	0.9991	Switzerland	Europe	dairy
TOG3	Toggenburg	CRR576031	35.62	0.9991	Switzerland	Europe	dairy
TOG4	Toggenburg	CRR576032	32.82	0.9991	Switzerland	Europe	dairy
TOG5	Toggenburg	CRR576033	33.32	0.9991	Switzerland	Europe	dairy
TOG6	Toggenburg	CRR576034	30.48	0.9991	Switzerland	Europe	dairy
TOG7	Toggenburg	ERR2214966	28.64	0.9991	Switzerland	Europe	dairy
TOG8	Toggenburg	SRR10201951	31.32	0.9992	Switzerland	Europe	dairy
TOG9	Toggenburg	SRR10201954	22.8	0.9991	Switzerland	Europe	dairy
TOG10	Toggenburg	SRR10201955	18.7	0.9992	Switzerland	Europe	dairy
TOG11	Toggenburg	SRR10201956	22.12	0.9992	Switzerland	Europe	dairy
TOG12	Toggenburg	SRR10201957	18.7	0.999	Switzerland	Europe	dairy
TOG13	Toggenburg	SRR10201958	21.36	0.9993	Switzerland	Europe	dairy
TOG14	Toggenburg	SRR10201959	23.14	0.9992	Switzerland	Europe	dairy
TOG15	Toggenburg	SRR10201961	26.2	0.9992	Switzerland	Europe	dairy
TOG16	Toggenburg	SRR10201962	22.5	0.9992	Switzerland	Europe	dairy
TOG17	Toggenburg	SRR10201965	24.28	0.9987	Switzerland	Europe	dairy
TOG18	Toggenburg	SRR10201968	19.74	0.9987	Switzerland	Europe	dairy
TOG19	Toggenburg	SRR10201970	18.16	0.9991	Switzerland	Europe	dairy
TOG20	Toggenburg	SRR10201972	18.82	0.9991	Switzerland	Europe	dairy
TOG21	Toggenburg	SRR10201973	18.9	0.9991	Switzerland	Europe	dairy
TOG22	Toggenburg	SRR10201974	21.44	0.9991	Switzerland	Europe	dairy
TS1	Tangshan dairy	SRR10051499	11.48	0.998	Tangshan, China	Asia	dairy
TS2	Tangshan dairy	SRR10051500	26.34	0.9991	Tangshan, China	Asia	dairy
TS3	Tangshan dairy	SRR10051501	24.44	0.9989	Tangshan, China	Asia	dairy
TS4	Tangshan dairy	SRR10051502	26.18	0.9982	Tangshan, China	Asia	dairy
TS5	Tangshan dairy	SRR10051503	30.82	0.9993	Tangshan, China	Asia	dairy
TS6	Tangshan dairy	SRR10051504	30.3	0.9989	Tangshan, China	Asia	dairy
TS7	Tangshan dairy	SRR10051510	10.64	0.9988	Tangshan, China	Asia	dairy
TS8	Tangshan dairy	SRR10051515	9.46	0.9992	Tangshan, China	Asia	dairy
TS9	Tangshan dairy	SRR10051517	11.2	0.9993	Tangshan, China	Asia	dairy
TS10	Tangshan dairy	SRR10051518	9.18	0.9963	Tangshan, China	Asia	dairy
TS11	Tangshan dairy	SRR10051519	9.14	0.9982	Tangshan, China	Asia	dairy
TS12	Tangshan dairy	SRR10051520	16.04	0.9958	Tangshan, China	Asia	dairy
TS13	Tangshan dairy	SRR10051521	23.72	0.999	Tangshan, China	Asia	dairy
TS14	Tangshan dairy	SRR10051522	9.34	0.9975	Tangshan, China	Asia	dairy
TS15	Tangshan dairy	SRR10051523	9.88	0.9976	Tangshan, China	Asia	dairy
TS16	Tangshan dairy	SRR10051524	11.3	0.9978	Tangshan, China	Asia	dairy
TS17	Tangshan dairy	SRR10051525	25.74	0.9993	Tangshan, China	Asia	dairy
TS18	Tangshan dairy	SRR10051526	25.04	0.999	Tangshan, China	Asia	dairy
TS19	Tangshan dairy	SRR10051527	26	0.9993	Tangshan, China	Asia	dairy
TS20	Tangshan dairy	SRR10051528	11.4	0.9986	Tangshan, China	Asia	dairy
TS21	Tangshan dairy	SRR10051529	11.04	0.9972	Tangshan, China	Asia	dairy
TS22	Tangshan dairy	SRR10051530	25.12	0.9959	Tangshan, China	Asia	dairy
TS23	Tangshan dairy	SRR10051531	11.94	0.9974	Tangshan, China	Asia	dairy
TS24	Tangshan dairy	SRR10051532	8.8	0.9986	Tangshan, China	Asia	dairy
YS1	Yunshang black	CRR576017	39.6	0.999	Yunnan, China	Asia	non-dairy
YS2	Yunshang black	CRR576018	32.18	0.9991	Yunnan, China	Asia	non-dairy
YS3	Yunshang black	CRR576019	39.16	0.9991	Yunnan, China	Asia	non-dairy
YS4	Yunshang black	CRR576020	39.32	0.9991	Yunnan, China	Asia	non-dairy
YS5	Yunshang black	CRR576021	36.96	0.9991	Yunnan, China	Asia	non-dairy
YS6	Yunshang black	CRR576022	32.34	0.9988	Yunnan, China	Asia	non-dairy

## Sheet: Table S2
Table S2. SNP information
GOAT
Number of snp by chromosome				Number of effects by type and region
Chromosome	Length	SNP	Variants rate	Type			Region
1	157403528	1913549	82	Type (alphabetical order)	Count	Percent	Type (alphabetical order)	Count	Percent
2	136510947	1551732	87	3_prime_UTR_variant	348639	0.00412	DOWNSTREAM	4269745	0.05047
3	120038259	1339904	89	5_prime_UTR_premature_start_codon_gain_variant	14437	0.00017	EXON	560878	0.00663
4	120734966	1431361	84	5_prime_UTR_variant	83269	0.00098	INTERGENIC	17771888	0.21006
5	119020588	1336103	89	downstream_gene_variant	4269745	0.05044	INTRON	28319838	0.33473
6	117642375	1475605	79	initiator_codon_variant	62	0	SPLICE_SITE_ACCEPTOR	533	1e-05
7	108433636	1204357	90	intergenic_region	17771888	0.20993	SPLICE_SITE_DONOR	660	1e-05
8	112672867	1291035	87	intragenic_variant	327353	0.00387	SPLICE_SITE_REGION	47742	0.00056
9	91568626	1035411	88	intron_variant	28360491	0.33502	TRANSCRIPT	28955001	0.34224
10	101087560	1119504	90	missense_variant	167186	0.00197	UPSTREAM	4231278	0.05001
11	106225002	1136800	93	non_canonical_start_codon	36	0	UTR_3_PRIME	348639	0.00412
12	87277232	1111626	78	non_coding_transcript_exon_variant	105622	0.00125	UTR_5_PRIME	97706	0.00115
13	83034183	851794	97	non_coding_transcript_variant	28627648	0.33817
14	94672733	1121215	84	splice_acceptor_variant	533	1e-05
15	81904557	1034727	79	splice_donor_variant	677	1e-05
16	79370172	912357	86	splice_region_variant	50692	0.0006
17	71137785	823143	86	start_lost	157	0
18	67275902	749183	89	stop_gained	1647	2e-05
19	62516450	665064	94	stop_lost	143	0
20	71784255	886379	80	stop_retained_variant	227	0
21	69425955	803118	86	synonymous_variant	292596	0.00346
22	60283066	626019	96	upstream_gene_variant	4231278	0.04998
23	48866549	646346	75
24	62310066	738460	84
25	42858509	465599	92
26	51421553	632511	81
27	44709034	536455	83
28	44672302	571710	78
29	51332696	640519	80
Total	2466191353	28651586	86
SHEEP
Number of snp by chromosome				Number of effects by type and region
Chromosome	Length	SNP	Variants rate	Type			Region
1	278617202	3047947	91	Type (alphabetical order)	Count	Percent	Type (alphabetical order)	Count	Percent
2	250202058	2648628	94	3_prime_UTR_variant	961115	0.00625	DOWNSTREAM	7049759	0.04585
3	226089100	2381258	94	5_prime_UTR_premature_start_codon_gain_variant	103141	0.00067	EXON	1316837	0.00856
4	121578099	1338913	90	5_prime_UTR_variant	546293	0.00355	INTERGENIC	15274728	0.09934
5	108220788	1152495	93	downstream_gene_variant	7049759	0.04582	INTRON	59804438	0.38895
6	118469697	1402264	84	initiator_codon_variant	141	0	SPLICE_SITE_ACCEPTOR	893	1e-05
7	101274418	1078148	93	intergenic_region	15274728	0.09928	SPLICE_SITE_DONOR	1068	1e-05
8	91792871	1002004	91	intragenic_variant	1165755	0.00758	SPLICE_SITE_REGION	85428	0.00056
9	95179658	1087325	87	intron_variant	59876742	0.38919	TRANSCRIPT	61707781	0.40132
10	86459471	1020508	84	missense_variant	182341	0.00119	UPSTREAM	6908675	0.04493
11	62547497	616286	101	non_canonical_start_codon	95	0	UTR_3_PRIME	961115	0.00625
12	80403655	868067	92	non_coding_transcript_exon_variant	663791	0.00431	UTR_5_PRIME	649434	0.00422
13	83511835	830876	100	non_coding_transcript_variant	60542026	0.39352
14	66516657	690182	96	splice_acceptor_variant	893	1e-05
15	82538637	943415	87	splice_donor_variant	1087	1e-05
16	71897364	840038	85	splice_region_variant	88989	0.00058
17	73167223	821212	89	start_lost	277	0
18	67984460	757803	89	stop_gained	1872	1e-05
19	60561550	627083	96	stop_lost	265	0
20	51451717	593439	86	stop_retained_variant	370	0
21	47514194	537737	88	synonymous_variant	479918	0.00312
22	51512491	599781	85	upstream_gene_variant	6908675	0.04491
23	62440644	725487	86
24	42630236	456183	93
25	44863754	547653	81
26	45052359	520061	86
Total	2472477635	27134793	91

## Sheet: Table S3
Table S3. Statistics on diversity parameters of different goat breeds
Breeds	Ho	He	MAF
ALP	0.167523	0.177071	0.856177
APP	0.161527	0.149405	0.925035
BOO	0.16541	0.157693	0.894793
GRI	0.180861	0.169708	0.885598
GS	0.181904	0.159447	0.949869
GZ	0.165811	0.174429	0.844557
LON	0.142763	0.14825	0.867945
LS	0.401207	0.224328	0.999734
NUB	0.148671	0.161044	0.848988
PEA	0.191205	0.173051	0.883301
SAN	0.175777	0.185709	0.763927
TOG	0.170914	0.169295	0.843447
TS	0.173824	0.183905	0.796359
YS	0.17881	0.161293	0.944818
Note: Ho, observed heterozygosity; He, expected heterozygosity; MAF, minor allele frequency

## Sheet: Table S4
Table S4. Statistics on diversity parameters of different sheep breeds
Breeds	Ho	He	MAF
ALS	0.37006	0.32895	0.05
AWA	1	0.50002	0.5
DMAN	0.2695	0.30346	0.02
DMS	0.30709	0.29765	0.025
EFR	0.32312	0.31152	0.04167
FIN	0.34774	0.32861	0.05
HUS	0.33784	0.32291	0.05
STHS	0.34191	0.32254	0.05
TAN	0.34742	0.32406	0.05
Note: Ho, observed heterozygosity; He, expected heterozygosity; MAF, minor allele frequency

## Sheet: Table S5
Table S5. The top 1% of candidate genes under selection in goat by FST
Chrom	Gene
1	B3GALNT1
1	BRWD1
1	C1H3orf33
1	CBLB
1	DCBLD2
1	EVA1C
1	GPR87
1	IGF2BP2
1	KCNH8
1	LAMP3
1	LOC102184199
1	LOC106501989
1	MCF2L2
1	MED12L
1	MRPL3
1	P2RY12
1	P2RY13
1	PLCH1
1	PSMG1
1	SEMA5B
1	SLC33A1
1	TRNAE
1	TRNAR
1	URB1
2	CFAP221
2	CLASP1
2	LOC108633356
2	METTL5
2	MGAT5
2	NCMAP
2	NECAP2
2	RCAN3
2	SPATA21
2	SSB
2	TRNAC
3	AMPD1
3	CD101
3	CSDE1
3	DENND2C
3	FAM102B
3	HENMT1
3	LOC102175073
3	LOC102177580
3	LOC102177854
3	LOC102183650
3	LOC102189080
3	NRAS
3	NTNG1
3	OMA1
3	PLPP3
3	REG4
3	SLC25A24
3	SYCP1
3	SYDE2
3	TSHB
3	TSPAN2
3	TTF2
4	ICA1
4	ISPD
4	KIAA1324L
4	LOC108635861
4	NOBOX
4	TRNAC
5	AAAS
5	C5H12orf10
5	CAPS2
5	CPNE8
5	CSAD
5	DDX11
5	EIF4B
5	EPS8
5	ESPL1
5	ETFBKMT
5	FKBP4
5	GLIPR1L1
5	ITFG2
5	ITGB7
5	KCNA6
5	LOC102169365
5	LOC102169653
5	LOC102179923
5	LOC102186205
5	LOC106502140
5	LOC108636060
5	LOC108636065
5	LOC108636066
5	LOC108636093
5	LOC108636097
5	MFSD5
5	MRPL42
5	MUC19
5	MUCL1
5	PFDN5
5	RARG
5	SMIM10L1
5	SOAT2
5	SP1
5	SP7
5	SPRYD3
5	SYN3
5	TIMP3
5	TNS2
5	ZNF740
6	ABCG2
6	AMTN
6	BANK1
6	C6H4orf32
6	LOC102172432
6	LOC102173083
6	LOC106502194
6	LRRC66
6	NSUN7
6	PDS5A
6	PPA2
6	SCARB2
6	SCFD2
6	SGCB
6	SPATA18
6	TBCK
7	CSF1R
7	DOT1L
7	ELL2
7	FAM114A2
7	HMGXB3
7	LOC102181858
7	LOC102182119
7	MARCH3.
7	PCBD2
7	PDE6A
7	PLEKHJ1
7	SF3A2
7	SLC26A2
7	TIGD6
7	TXNDC15
8	ALAD
8	B4GALT1
8	BAG1
8	C8H9orf43
8	CDK5RAP2
8	CHMP5
8	DCAF12
8	LOC102188855
8	NFX1
8	NKX2
8	NTRK2
8	PLPPR1
8	POLE3
8	SPINK4
8	STC1
9	ASCC3
9	DOPEY1
9	DSE
9	ECHDC1
9	FAM26E
9	GRM1
9	IFNGR1
9	LOC102173569
9	LOC102181592
9	LOC106502458
9	LOC108633231
9	LOC108636731
9	MANEA
9	PDE7B
9	RAB32
9	RARS2
9	SLC18B1
9	SLC35A1
9	STXBP5
9	TRAPPC3L
9	TRNAS
9	TTK
10	ACTC1
10	ADCK1
10	AGGF1
10	ANKDD1A
10	BBOF1
10	CCDC112
10	CHD8
10	EHD4
10	ENTPD5
10	FRMD6
10	GJD2
10	LOC102178361
10	LOC102187492
10	LOC102187772
10	LOC102188679
10	LOC102189488
10	LOC106502555
10	LOC108636840
10	LOC108637002
10	MTFMT
10	PGGT1B
10	PTGER2
10	RPGRIP1
10	SPG21
10	SUPT16H
10	VPS13C
10	ZBED3
11	BOLA3
11	BRE
11	CCDC187
11	CEBPZ
11	CEBPZOS
11	COMMD1
11	DGUOK
11	EIF2AK2
11	LOC102172165
11	LOC102183700
11	LOC102183973
11	LOC102184254
11	LOC102184531
11	LOC102189594
11	MERTK
11	MOB1A
11	NDUFAF7
11	NPAS2
11	PDCL
11	PRKD3
11	RC3H2
11	SULT6B1
11	VWA3B
12	ATP12A
12	CLYBL
12	ELF1
12	FBXL3
12	LOC102180841
12	LRCH1
12	MYCBP2
12	PDS5B
12	TRNAC
12	TRNAK
13	ABHD16B
13	ACSS2
13	ACTL10
13	AHCY
13	ARFGAP1
13	ASIP
13	ASXL1
13	BCL2L1
13	BPIFA1
13	BPIFA2
13	BPIFA3
13	C13H20orf144
13	C13H20orf96
13	CAMK1D
13	CBFA2T2
13	CCDC3
13	CDK5RAP1
13	CFAP61
13	CHRNA4
13	COL20A1
13	CREM
13	CTCFL
13	CTNNBL1
13	CUL2
13	DHTKD1
13	DLGAP4
13	DNAJC5
13	DUSP15
13	E2F1
13	EDN3
13	EIF2S2
13	ENKUR
13	FAM107B
13	FAM83D
13	FNDC11
13	FOXS1
13	GGT7
13	GMEB2
13	GSS
13	LKAAEAR1
13	LOC102171351
13	LOC102173668
13	LOC102175312
13	LOC102187204
13	LOC102187932
13	LOC102188299
13	LOC102188874
13	LOC102190430
13	LOC102190531
13	LOC106502777
13	LOC108633189
13	LOC108637400
13	LOC108637417
13	MCM10
13	MIR1388
13	MIR296
13	MIR499
13	MLLT10
13	MPP7
13	MYH7B
13	MYL9
13	MYLK2
13	MYT1
13	NECAB3
13	NFATC2
13	NPBWR2
13	NRSN2
13	NUDT5
13	OPRL1
13	OPTN
13	PABPC1L
13	PCK1
13	PHACTR3
13	PHF20
13	PIP4K2A
13	PPP1R16B
13	PRPF6
13	PRTFDC1
13	RALY
13	RBCK1
13	RGS19
13	SAMD10
13	SCAND1
13	SCRT2
13	SEC61A2
13	SLC24A3
13	SLCO4A1
13	SNRPB
13	SNTA1
13	SOX12
13	SOX18
13	SRMS
13	SRXN1
13	STK4
13	STMN3
13	TBC1D20
13	TCEA2
13	THNSL1
13	TMC2
13	TOMM34
13	TPD52L2
13	TRNAG
13	TRNAS
13	TRPC4AP
13	UCKL1
13	YWHAB
13	ZCCHC3
13	ZNF512B
13	ZNF831
14	CNGB3
14	CPNE3
14	EFCAB1
14	GRHL2
14	LOC106502867
14	LOC108637514
14	OXR1
14	PKIA
14	SDC2
14	STK3
14	TMEM74
14	TRNAE
14	TSPYL5
14	ZC2HC1A
15	ABTB2
15	ALKBH8
15	ARHGAP20
15	CCDC73
15	DCDC1
15	DNAJC24
15	LOC102168904
15	LOC102172740
15	LOC102173289
15	LOC102183344
15	LOC102183984
15	LOC102185386
15	LOC102185677
15	LOC102187148
15	LOC108637609
15	PIWIL4
16	ADORA1
16	ATP2B4
16	CD55
16	LAX1
16	LOC108637762
16	NCF2
17	BICDL1
17	TRNAG
17	TRNAS
18	CIC
18	CNFN
18	FCGBP
18	LOC102169213
18	LOC106503116
18	MEGF8
18	MPHOSPH6
18	PAFAH1B3
18	PRR19
18	TMEM145
18	TRNAC
18	ZNF792
19	ACACA
19	C19H17orf78
19	CARD14
19	CCDC40
19	EIF4A3
19	GAA
19	LOC108638228
19	RECQL5
19	RPA1
19	RPTOR
19	SAP30BP
19	SMIM6
19	TADA2A
19	USP32
20	ADAMTS6
20	CARD6
20	DEPDC1B
20	HCN1
20	IPO11
20	LOC108638402
20	LRRC70
20	NPR3
20	PRKAA1
20	RNF180
20	RPL37
21	ACAN
21	CRABP1
21	MBIP
21	PCSK6
22	BRK1
22	C22H3orf67
22	CHL1
22	EGFR
22	FANCD2
22	FANCD2OS
22	GLT8D1
22	LOC102177570
22	LOC102179243
22	MKRN2
22	MKRN2OS
22	NEK4
22	RAF1
22	SETD5
22	SPCS1
22	TRNAG
22	TRNAW
22	TSEN2
22	ZNF852
23	ADTRP
23	BPHL
23	BYSL
23	EXOC2
23	MED20
23	RIPK1
23	TFAP2A
23	TUBB2A
24	CCDC178
24	DSG1
24	DSG2
24	DSG4
24	LOC102180556
24	LOC102183378
24	LOC102184299
24	LOC108633772
24	LOC108633787
24	LOC108633803
24	LOC108633804
24	PHLPP1
24	SERPINB11
24	SERPINB12
24	SERPINB7
24	TRAPPC8
24	TTR
25	ACSM3
25	AP4M1
25	ARPC1B
25	ATP5J2
25	BUD31
25	CARHSP1
25	CCDC189
25	CHST12
25	CNPY4
25	CPSF4
25	ERI2
25	GRIFIN
25	IQCE
25	KIAA0556
25	LFNG
25	LOC102168966
25	LOC102171679
25	LOC102184304
25	LOC102190927
25	LOC102190928
25	MBLAC1
25	MCM7
25	MEPCE
25	PDAP1
25	PHKG2
25	PPP1R35
25	PTCD1
25	PVRIG
25	RNF40
25	SRCAP
25	TAF6
25	TMEM265
25	TRNAS
25	TRNAW
25	TTYH3
25	USP7
25	ZCWPW1
25	ZNF629
26	LOC102175357
26	LOC102185056
26	LOC102186455
26	LOC102188304
26	PDE6C
26	RBP4
26	SGMS1
27	BAG4
27	DDHD2
27	HGSNAT
27	INTS10
27	LOC106503669
27	LOC108634068
27	LSM1
27	NGLY1
27	PLPP5
27	WHSC1L1
28	C28H10orf107
28	CHRM3
28	COG2
28	FAM13C
28	HEATR1
28	LOC106503685
28	LOC106503688
28	LOC108634128
28	SH2D4B
28	TAF5L
28	TRNAG
28	URB2
29	ANO9
29	PKP3
29	SIGIRR

## Sheet: Table S6
Table S6. The top 1% of candidate genes under selection in goat by θπ
Chrom	Gene
1	ABCC5
1	BRWD1
1	C1H3orf33
1	CEP63
1	LOC102183269
1	MME
1	PLCH1
1	SEMA5B
1	SLC33A1
1	TFG
1	TM4SF4
1	TRNAR
1	WWTR1
1	ZBBX
2	ANKAR
2	ARL5A
2	CLASP1
2	DLX1
2	DLX2
2	GMEB1
2	GPD2
2	KIAA1522
2	LOC102176740
2	LOC108633356
2	METAP1D
2	METTL5
2	NABP1
2	ORMDL1
2	OSGEPL1
2	RUNX3
2	S100PBP
2	SSB
2	TMEFF2
2	TRNAC
2	TRNAE
2	UBR3
2	YARS
2	YTHDF2
3	ACOT11
3	AMPD1
3	CSDE1
3	DENND2C
3	LOC102175073
3	LOC102183650
3	LOC102187823
3	LOC102189080
3	LOC102191575
3	LOC108635625
3	MIR2284C
3	NRAS
3	NTNG1
3	OMA1
3	PLPP3
3	SIKE1
3	SYCP1
3	TRIM33
3	TRNAE
3	TRNAG
3	TRNAN
3	TRNAQ
3	TRNAV
3	TSHB
3	TSPAN2
3	ZNF644
4	FAM126A
4	ISPD
4	LOC102170866
4	LOC102179465
4	LOC102186105
4	LOC108635826
4	LOC108635861
4	MGAM
4	MTERF1
4	PHTF2
5	AAAS
5	ARL1
5	ATF7
5	C5H12orf10
5	CFAP54
5	COPZ1
5	CSAD
5	DENND5B
5	DIP2B
5	ESPL1
5	ETFBKMT
5	GPR84
5	HEBP1
5	HIGD1C
5	IGFBP6
5	LOC102168424
5	LOC102169365
5	LOC102169653
5	LOC102179923
5	LOC102186205
5	LOC108636060
5	MFSD5
5	MIR148B
5	MSRB3
5	NEDD1
5	PFDN5
5	PPHLN1
5	PRICKLE1
5	RARG
5	SCN8A
5	SMIM10L1
5	SOAT2
5	SP1
5	SP7
5	SPIC
5	SPRYD3
5	SYN3
5	SYT10
5	TIMP3
5	TRNAE
5	TRNAG
5	UTP20
5	ZNF385A
5	ZNF740
6	ART3
6	BANK1
6	CD38
6	DAPP1
6	DNAJB14
6	EVC
6	EVC2
6	HAUS3
6	LAMTOR3
6	LCORL
6	LOC102170130
6	LOC102186672
6	LOC102186941
6	LOC106502194
6	LOC108636224
6	LRRC66
6	NSUN7
6	NUP54
6	PI4K2B
6	RELL1
6	SCFD2
6	SEC24B
6	SGCB
6	SPATA18
6	TRNAC
6	TRNAW
7	ALKBH7
7	B3GNT3
7	CLPP
7	CRB3
7	DENND1C
7	DNMT1
7	DOT1L
7	EFNA2
7	FAM114A2
7	FAM81B
7	FCHO1
7	GRIA1
7	GTF2F1
7	ICAM1
7	ICAM4
7	ICAM5
7	KHSRP
7	LOC102178619
7	LOC102181858
7	LOC102182119
7	LOC102186946
7	LOC102187473
7	LOC108636393
7	LOC108636437
7	MRPL4
7	PAM
7	PCBD2
7	PDE6A
7	PLEKHJ1
7	PRDM6
7	PSPN
7	SF3A2
7	SLC12A2
7	SLC25A23
7	SLC25A41
7	SLC26A2
7	SPINK13
7	TIGD6
7	TTC37
7	XRCC4
7	ZGLP1
8	AQP3
8	AQP7
8	B4GALT1
8	BAG1
8	CDK5RAP2
8	CHMP5
8	DCAF12
8	ELAVL2
8	LOC102188855
8	LOC108636570
8	MSRA
8	NFX1
8	NOL6
8	SMU1
8	SPINK4
8	STC1
8	TRNAN
8	TTC39B
8	TXN
8	UBAP2
8	UBE2R2
8	VPS13A
8	ZCCHC7
9	ASCC3
9	CCR6
9	CEP57L1
9	DLL1
9	DSE
9	ECHDC1
9	FABP7
9	FAM120B
9	FGFR1OP
9	FYN
9	GABRR1
9	GABRR2
9	GPR31
9	GRM1
9	HBS1L
9	IGF2R
9	LOC102181592
9	LOC106502458
9	LOC106502463
9	LOC108633231
9	LOC108636758
9	LOC108636786
9	MANEA
9	RAB32
9	RNASET2
9	SESN1
9	SMPDL3A
9	STXBP5
9	THEMIS
9	TRNAS
9	TTK
10	AGGF1
10	ANKDD1A
10	AREL1
10	ARHGEF40
10	CCDC112
10	CHURC1
10	CORO2B
10	FCF1
10	FRMD6
10	GTF2A1
10	LOC102169186
10	LOC102174212
10	LOC102181869
10	LOC102189488
10	LOC106502529
10	LOC106502555
10	LOC108636840
10	MIR208B
10	NGDN
10	PGGT1B
10	PROX2
10	PTGER2
10	RPAP1
10	SPTB
10	TLE3
10	TMEM253
10	TNFAIP8L3
10	TSHR
10	TYRO3
10	VPS13C
10	YLPM1
10	ZBED3
10	ZNF219
11	ADCY3
11	BRE
11	CENPO
11	COMMD1
11	DGUOK
11	EIF2B4
11	ENDOG
11	GARNL3
11	GTF3C2
11	LOC102172165
11	LOC102184254
11	LOC102184531
11	MPV17
11	PDCL
11	PPM1G
11	PTRHD1
11	SNX17
11	TBC1D13
11	VWA3B
11	ZER1
11	ZNF513
12	CAB39L
12	CLYBL
12	LRCH1
12	METTL21C
12	PDS5B
12	PHF11
12	PSPC1
12	SETDB2
12	TPP2
12	TRNAC
12	TRNAC
12	ZMYM5
13	ABHD16B
13	ACSS2
13	ARL5B
13	BPIFA2
13	BTBD3
13	C13H20orf144
13	CBFA2T2
13	CCDC7
13	DLGAP4
13	DNAJC5
13	ECHDC3
13	EDN3
13	GSS
13	LKAAEAR1
13	LOC102171351
13	LOC102176896
13	LOC102187932
13	LOC102188299
13	LOC102188874
13	LOC102190430
13	LOC106502748
13	LOC108633189
13	LOC108637400
13	LOC108637412
13	MEIG1
13	MIR1388
13	MLLT10
13	MPP7
13	MYL9
13	MYT1
13	NECAB3
13	NFATC2
13	NPBWR2
13	OPRL1
13	PABPC1L
13	PROSER2
13	PRPF6
13	RGS19
13	SAMD10
13	SKIDA1
13	SNRPB
13	SOX18
13	STAM
13	TCEA2
13	TMC2
13	TMEM236
13	TOMM34
13	TPD52L2
13	UCKL1
13	UPF2
13	XRN2
13	YWHAB
13	ZBTB46
13	ZNF512B
13	ZNF831
14	LOC102171353
14	LOC102174584
14	LOC106502867
14	LOC108637486
14	LOC108637522
14	MROH5
14	PCMTD1
14	PRKDC
14	TMEM74
14	TRNAE
15	ALG9
15	BBOX1
15	C15H11orf1
15	CCDC73
15	CRYAB
15	DCDC1
15	DNAJC24
15	FDXACB1
15	HSPB2
15	LOC102168475
15	LOC102168753
15	LOC102168904
15	LOC102169889
15	LOC102173289
15	LOC102173320
15	LOC102174139
15	LOC102177820
15	LOC102183344
15	LOC102183984
15	LOC102185386
15	LOC102185677
15	LOC102187333
15	LOC102187877
15	LOC102187880
15	LOC102188152
15	LOC102188156
15	LOC102188423
15	LOC102188427
15	LOC106502903
15	LOC108637609
15	LOC108637671
15	MMP7
15	PIWIL4
15	TMPRSS13
15	USP28
16	ACTRT2
16	ATP2B4
16	FH
16	GPR153
16	HES3
16	ICMT
16	IGFN1
16	LAX1
16	LOC106502978
16	LOC108637762
16	LOC108637782
16	MORN1
16	PEX10
16	PKP1
16	PLCH2
16	PRDM2
16	RER1
16	RNF207
16	RPL22
16	RPS6KC1
16	SKI
16	TRNAC
18	ATP4A
18	AXL
18	C18H16orf46
18	CBFA2T3
18	CDH11
18	CIC
18	DEDD2
18	DMKN
18	ERF
18	GALNS
18	GAPDHS
18	GCSH
18	GNAO1
18	GSK3A
18	HNRNPUL1
18	LOC102168381
18	LOC102169213
18	LOC102180342
18	LOC102189985
18	LOC106503084
18	LOC108638071
18	LOC108638103
18	LOC108638120
18	MEGF8
18	MPHOSPH6
18	PABPN1L
18	PAFAH1B3
18	PKD1L2
18	POU2F2
18	PRR19
18	SBSN
18	TMEM145
18	TMEM147
18	TRAPPC2L
19	ACACA
19	BRCA1
19	C19H17orf78
19	C1QBP
19	CCDC40
19	DERL2
19	DHX33
19	EIF4A3
19	GAA
19	LOC102173120
19	LOC106503257
19	LOC106503287
19	MIS12
19	NUP88
19	RND2
19	RPAIN
19	RPTOR
19	TADA2A
19	TNFRSF13B
19	USP22
19	USP32
20	ADAMTS6
20	BDP1
20	DDX4
20	DEPDC1B
20	FBXL7
20	HCN1
20	IL31RA
20	MCCC2
20	NPR3
20	RNF180
20	TRNAS
21	CCDC33
21	CPEB1
21	CRABP1
21	LOC102175848
21	LOC102176116
21	LOC102178490
21	LOC102183270
21	LOC102183827
21	LOC102184095
21	LOC102187807
21	LOC102188356
21	LOC102188633
21	LOC102191088
21	LOC108638464
21	LOC108638532
21	LOC108638534
21	MBIP
21	TJP1
21	TRNAE
21	TRNAE
21	TTC6
21	UNC79
21	WARS
21	WDR25
22	AZI2
22	CMC1
22	EGFR
23	ABHD16A
23	AIF1
23	APOM
23	BAG6
23	C23H6orf25
23	C23H6orf47
23	CAPN11
23	CSNK2B
23	GPANK1
23	LOC102169865
23	LOC102180547
23	LOC108633423
23	LOC108633440
23	LOC108633456
23	LST1
23	LTB
23	LY6G5B
23	LY6G5C
23	LY6G6C
23	LY6G6D
23	LY6G6F
23	MED20
23	NCR3
23	PRIM2
23	PRRC2A
23	SLC29A1
23	SYCP2L
24	ATP8B1
24	DSG1
24	LAMA3
24	LOC102180556
24	LOC102184299
24	LOC108633803
24	LOC108633804
24	NOL4
24	PHLPP1
24	SERPINB12
24	TRNAW
24	ZNF532
25	ACSM3
25	ARPC1B
25	BFAR
25	BUD31
25	CPSF4
25	ERI2
25	LOC102172230
25	LOC102190927
25	LOC102190953
25	MEPCE
25	PDAP1
25	PPP1R35
25	PTCD1
25	USP7
25	ZCWPW1
26	ENO4
26	LOC106503891
26	SGMS1
26	TDRD1
26	VWA2
26	ZRANB1
27	BAG4
27	DDHD2
27	HGSNAT
27	HOOK3
27	INTS10
27	IRF2
27	LOC106503669
27	LOC108634068
27	LSM1
27	PLPP5
27	PSD3
27	RNF170
27	WHSC1L1
27	ZDHHC2
28	C28H10orf107
28	CSGALNACT2
28	DISC1
28	LOC102171842
28	LOC106503685
28	LOC108634148
28	RASGEF1A
28	SH2D4B
28	TAF5L
28	URB2
29	ANO9
29	LOC102170585
29	LOC102183041
29	LOC108634249
29	PKP3
29	PTDSS2
29	RSF1
29	SIGIRR

## Sheet: Table S7
Table S7. Overlapping selection candidate genes in goat by FST and θπ
Chrom	Start	End	Gene	FST	θπ
1	111400001	111450000	SLC33A1	5.62062795459456	0.849940345665611
1	111425001	111475000	C1H3orf33	6.85112119059388	1.11403435881924
1	111450001	111500000	C1H3orf33	5.88668886129016	0.754181976309186
1	111725001	111775000	PLCH1	6.23418244401108	0.510094100393217
1	112425001	112475000	TRNAR	3.30543981525293	0.599761015178352
1	138875001	138925000	BRWD1	5.50979758055294	0.548595642218505
1	138900001	138950000	BRWD1	5.95874601148159	0.668747424765976
1	138925001	138975000	BRWD1	4.70193167488987	0.575008218791211
1	66975001	67025000	SEMA5B	7.61597950279437	0.698512411633016
2	109725001	109775000	METTL5	4.5490571681579	0.760461445865599
2	109725001	109775000	SSB	4.5490571681579	0.760461445865599
2	17200001	17250000	LOC108633356	6.95661609699774	0.691566214158292
2	38900001	38950000	TRNAC	5.10768629724872	0.524200402453526
2	38925001	38975000	TRNAC	5.68923607714762	0.809490236613889
2	62875001	62925000	CLASP1	3.40323513178802	0.621234060259278
3	106925001	106975000	LOC102183650	5.61897630755647	1.30376338549177
3	106950001	107000000	LOC102183650	3.6621955754816	0.703556611828921
3	108550001	108600000	LOC102175073	4.91067881010174	0.534422090890976
3	108550001	108600000	LOC102189080	4.91067881010174	0.534422090890976
3	31150001	31200000	PLPP3	6.38137334181784	0.619603988512958
3	33225001	33275000	OMA1	3.7138176417311	0.68976937095694
3	33250001	33300000	OMA1	3.96378308611427	0.770815138351965
3	84425001	84475000	NTNG1	5.39859477629684	0.666949370671635
3	91900001	91950000	AMPD1	4.1930705572852	0.765418516748062
3	91900001	91950000	DENND2C	4.1930705572852	0.765418516748062
3	91925001	91975000	AMPD1	6.19434860368053	1.03575612206437
3	91925001	91975000	DENND2C	6.19434860368053	1.03575612206437
3	91950001	92000000	AMPD1	3.78542949492697	0.856373490958189
3	91950001	92000000	CSDE1	3.78542949492697	0.856373490958189
3	91950001	92000000	NRAS	3.78542949492697	0.856373490958189
3	92225001	92275000	SYCP1	4.87383250779599	0.758080893088869
3	92225001	92275000	TSHB	4.87383250779599	0.758080893088869
3	92250001	92300000	TSHB	6.08642480457359	0.890087145225745
3	92250001	92300000	TSPAN2	6.08642480457359	0.890087145225745
4	120575001	120625000	LOC108635861	4.9191556456355	0.544356007313269
4	120600001	120650000	LOC108635861	6.55714421043087	0.690055978521049
4	120625001	120675000	LOC108635861	6.78788901722365	0.65750841083258
4	120650001	120700000	LOC108635861	7.31269176726955	0.879495743243548
4	95925001	95975000	ISPD	3.86825473610206	0.561907320794507
5	100825001	100875000	LOC102186205	3.9569498013096	0.501983702035921
5	26375001	26425000	SP1	5.49379117763963	0.669714791676552
5	26400001	26450000	AAAS	8.58842717801827	1.80415215343865
5	26400001	26450000	SP7	8.58842717801827	1.80415215343865
5	26425001	26475000	AAAS	8.14248247773243	1.59402285198639
5	26425001	26475000	C5H12orf10	8.14248247773243	1.59402285198639
5	26425001	26475000	ESPL1	8.14248247773243	1.59402285198639
5	26425001	26475000	PFDN5	8.14248247773243	1.59402285198639
5	26425001	26475000	SP7	8.14248247773243	1.59402285198639
5	26450001	26500000	C5H12orf10	7.23464334841051	0.922159095146537
5	26450001	26500000	ESPL1	7.23464334841051	0.922159095146537
5	26450001	26500000	MFSD5	7.23464334841051	0.922159095146537
5	26450001	26500000	PFDN5	7.23464334841051	0.922159095146537
5	26475001	26525000	ESPL1	4.92486354348774	0.60859559129112
5	26475001	26525000	MFSD5	4.92486354348774	0.60859559129112
5	26475001	26525000	RARG	4.92486354348774	0.60859559129112
5	26550001	26600000	CSAD	4.31264494505793	0.872246824006595
5	26550001	26600000	SOAT2	4.31264494505793	0.872246824006595
5	26550001	26600000	ZNF740	4.31264494505793	0.872246824006595
5	69950001	70000000	SYN3	3.65120888415466	0.576999118332779
5	69975001	70025000	SYN3	4.54427224953283	0.687731260675268
5	70000001	70050000	SYN3	4.41677967154806	0.611859650971705
5	70025001	70075000	SYN3	4.76694503624237	0.698057744127937
5	70050001	70100000	SYN3	4.4729275745343	0.771219427139607
5	70050001	70100000	TIMP3	4.4729275745343	0.771219427139607
5	70075001	70125000	SYN3	3.3010840010054	0.536648008279443
5	70075001	70125000	TIMP3	3.3010840010054	0.536648008279443
5	76825001	76875000	ETFBKMT	4.72603438681346	0.82726980185353
5	97250001	97300000	LOC102169365	3.59769228159676	0.635406927276812
5	97250001	97300000	LOC102169653	3.59769228159676	0.635406927276812
5	97250001	97300000	LOC102179923	3.59769228159676	0.635406927276812
5	97250001	97300000	SMIM10L1	3.59769228159676	0.635406927276812
5	98900001	98950000	LOC108636060	3.74111839571374	0.543979592567325
5	98925001	98975000	LOC108636060	5.88887486472293	0.723575435117447
6	23125001	23175000	BANK1	4.39980171155351	0.536453695709418
6	60225001	60275000	LOC106502194	3.75456636497981	0.716906147232024
6	60225001	60275000	NSUN7	3.75456636497981	0.716906147232024
6	68375001	68425000	LRRC66	4.80477908824737	0.570429753657048
6	68375001	68425000	SGCB	4.80477908824737	0.570429753657048
6	68400001	68450000	LRRC66	4.23436982954661	0.524720151544469
6	68400001	68450000	SGCB	4.23436982954661	0.524720151544469
6	68400001	68450000	SPATA18	4.23436982954661	0.524720151544469
6	69275001	69325000	SCFD2	3.72013276275911	0.558550732477098
6	69300001	69350000	SCFD2	8.71562019256966	0.956949484736335
6	69325001	69375000	SCFD2	8.21591600045561	0.802063498420795
7	101250001	101300000	LOC102182119	3.71539642198811	0.556711777070667
7	101275001	101325000	LOC102181858	3.53902642650832	0.608961723736533
7	101275001	101325000	LOC102182119	3.53902642650832	0.608961723736533
7	45075001	45125000	FAM114A2	3.37376456699062	0.570262018795459
7	49100001	49150000	SLC26A2	6.03347494364641	0.49072122911469
7	49100001	49150000	TIGD6	6.03347494364641	0.49072122911469
7	49125001	49175000	PDE6A	9.02967601907815	0.926599849089146
7	49125001	49175000	SLC26A2	9.02967601907815	0.926599849089146
7	49150001	49200000	PDE6A	6.88334450045477	0.827437979893032
7	64100001	64150000	PCBD2	3.91716453883312	0.491615110590223
7	89175001	89225000	DOT1L	4.06111691303577	0.585150945246009
7	89175001	89225000	PLEKHJ1	4.06111691303577	0.585150945246009
7	89175001	89225000	SF3A2	4.06111691303577	0.585150945246009
8	109650001	109700000	CDK5RAP2	4.30291318162758	0.548906987212189
8	70750001	70800000	STC1	4.35761184530098	0.77610931361142
8	70775001	70825000	STC1	4.00156046395621	0.829036209675178
8	74650001	74700000	B4GALT1	3.60108463507206	0.888132480753569
8	74675001	74725000	B4GALT1	4.15346341360695	1.20678108231608
8	74675001	74725000	LOC102188855	4.15346341360695	1.20678108231608
8	74700001	74750000	B4GALT1	4.0233071499578	1.08627947031326
8	74700001	74750000	LOC102188855	4.0233071499578	1.08627947031326
8	74725001	74775000	LOC102188855	4.67446089841802	0.991069456602335
8	74775001	74825000	BAG1	4.00223245760406	1.08643080364084
8	74775001	74825000	SPINK4	4.00223245760406	1.08643080364084
8	74800001	74850000	BAG1	3.30503499980242	1.04232509690712
8	74800001	74850000	CHMP5	3.30503499980242	1.04232509690712
8	74800001	74850000	SPINK4	3.30503499980242	1.04232509690712
8	74825001	74875000	BAG1	3.40985791255842	1.02984048554971
8	74825001	74875000	CHMP5	3.40985791255842	1.02984048554971
8	74825001	74875000	NFX1	3.40985791255842	1.02984048554971
8	75275001	75325000	DCAF12	3.27070664959886	0.553050266496754
9	11225001	11275000	ECHDC1	3.46875046429915	0.74324896844324
9	11225001	11275000	TRNAS	3.46875046429915	0.74324896844324
9	21450001	21500000	LOC102181592	6.00108970760532	0.673388006373355
9	21475001	21525000	LOC102181592	9.28373819582051	0.890118647809692
9	21475001	21525000	LOC108633231	9.28373819582051	0.890118647809692
9	21500001	21550000	DSE	6.96042136223257	0.596281934854391
9	21500001	21550000	LOC108633231	6.96042136223257	0.596281934854391
9	41525001	41575000	MANEA	3.69799745392503	0.556496668961218
9	41550001	41600000	MANEA	5.02503917487185	0.656622533611989
9	41575001	41625000	MANEA	5.39691884033171	0.654648535371721
9	41600001	41650000	MANEA	4.48054620131297	0.519962866396359
9	6950001	7000000	LOC106502458	3.39007053333731	0.64821292052086
9	6975001	7025000	LOC106502458	3.74811360669862	0.759776949860065
9	6975001	7025000	TTK	3.74811360669862	0.759776949860065
9	70475001	70525000	GRM1	9.60240891846486	0.780229
9	70500001	70550000	GRM1	6.23126777276738	0.526220605741571
9	70875001	70925000	RAB32	4.40589823223825	0.582483008341654
9	71675001	71725000	STXBP5	3.62297705463584	0.707647173190387
10	25975001	26025000	LOC102189488	3.48491069708365	0.527227914245336
10	55000001	55050000	VPS13C	4.36974821250738	0.523751990186405
10	55025001	55075000	VPS13C	4.7880116322871	0.723656185992556
10	55050001	55100000	LOC106502555	5.9028005162206	1.18148102389906
10	55050001	55100000	VPS13C	5.9028005162206	1.18148102389906
10	55075001	55125000	LOC106502555	4.80084428206838	1.16390763973153
10	58500001	58550000	FRMD6	4.28868796669653	0.824042083483348
10	58525001	58575000	FRMD6	4.99101038810167	0.725528122310527
10	89400001	89450000	ANKDD1A	3.65482793428225	0.527741796360975
10	89400001	89450000	LOC108636840	3.65482793428225	0.527741796360975
10	89400001	89450000	PTGER2	3.65482793428225	0.527741796360975
10	92975001	93025000	AGGF1	3.72375181288671	0.722707613087461
10	92975001	93025000	ZBED3	3.72375181288671	0.722707613087461
10	93000001	93050000	AGGF1	3.52649334016041	0.674957946287443
10	97075001	97125000	CCDC112	3.28315877285666	0.608770853331272
10	97075001	97125000	PGGT1B	3.28315877285666	0.608770853331272
11	10525001	10575000	DGUOK	3.84161787945826	0.744638330707559
11	3325001	3375000	VWA3B	4.27000168550082	0.582423668001827
11	60225001	60275000	COMMD1	4.13536006665998	0.567181804272741
11	71100001	71150000	LOC102172165	3.59574107112528	0.574539712799299
11	71175001	71225000	BRE	3.48079777210643	0.50824623723348
11	93475001	93525000	LOC102184254	6.38396416070113	0.638663874986409
11	93475001	93525000	LOC102184531	6.38396416070113	0.638663874986409
11	93475001	93525000	PDCL	6.38396416070113	0.638663874986409
12	58325001	58375000	PDS5B	3.71810058919754	0.862712859950153
12	59600001	59650000	TRNAC	4.95686015669634	0.590689998420139
12	70025001	70075000	LRCH1	4.08080713654876	0.861132093135179
12	9700001	9750000	CLYBL	3.84004719551027	0.810776229223187
12	9725001	9775000	CLYBL	3.83032352838893	0.747943072070567
13	22150001	22200000	MLLT10	3.45934255322921	0.776803837031631
13	35675001	35725000	MPP7	6.63705478036226	0.634146735706182
13	35700001	35750000	MPP7	4.93311368236921	0.503128944294811
13	42900001	42950000	LOC102187932	6.3357101589999	0.598041703659495
13	42900001	42950000	LOC102188299	6.3357101589999	0.598041703659495
13	51975001	52025000	SNRPB	4.24249042748391	0.554812995757843
13	51975001	52025000	TMC2	4.24249042748391	0.554812995757843
13	53050001	53100000	MYT1	5.51407243171036	0.917435781202605
13	53050001	53100000	NPBWR2	5.51407243171036	0.917435781202605
13	53075001	53125000	LKAAEAR1	7.89829779798259	1.52306798230352
13	53075001	53125000	NPBWR2	7.89829779798259	1.52306798230352
13	53075001	53125000	OPRL1	7.89829779798259	1.52306798230352
13	53075001	53125000	RGS19	7.89829779798259	1.52306798230352
13	53100001	53150000	LKAAEAR1	6.30785885600456	1.90453127912947
13	53100001	53150000	OPRL1	6.30785885600456	1.90453127912947
13	53100001	53150000	RGS19	6.30785885600456	1.90453127912947
13	53100001	53150000	SOX18	6.30785885600456	1.90453127912947
13	53100001	53150000	TCEA2	6.30785885600456	1.90453127912947
13	53125001	53175000	PRPF6	5.27460790011352	1.64215341904945
13	53125001	53175000	SOX18	5.27460790011352	1.64215341904945
13	53125001	53175000	TCEA2	5.27460790011352	1.64215341904945
13	53150001	53200000	PRPF6	6.92803612619147	1.62881121949164
13	53150001	53200000	SAMD10	6.92803612619147	1.62881121949164
13	53175001	53225000	LOC108637400	7.78656873364083	1.66268361057894
13	53175001	53225000	MIR1388	7.78656873364083	1.66268361057894
13	53175001	53225000	PRPF6	7.78656873364083	1.66268361057894
13	53175001	53225000	SAMD10	7.78656873364083	1.66268361057894
13	53175001	53225000	UCKL1	7.78656873364083	1.66268361057894
13	53175001	53225000	ZNF512B	7.78656873364083	1.66268361057894
13	53200001	53250000	DNAJC5	7.54351753715243	1.67643043139633
13	53200001	53250000	LOC108637400	7.54351753715243	1.67643043139633
13	53200001	53250000	MIR1388	7.54351753715243	1.67643043139633
13	53200001	53250000	UCKL1	7.54351753715243	1.67643043139633
13	53200001	53250000	ZNF512B	7.54351753715243	1.67643043139633
13	53225001	53275000	DNAJC5	7.08850497077509	1.53674061989319
13	53225001	53275000	TPD52L2	7.08850497077509	1.53674061989319
13	53250001	53300000	ABHD16B	5.42133730830669	1.27977116990787
13	53250001	53300000	DNAJC5	5.42133730830669	1.27977116990787
13	53250001	53300000	TPD52L2	5.42133730830669	1.27977116990787
13	56350001	56400000	EDN3	6.07816656938311	0.802320164611077
13	56375001	56425000	EDN3	6.68789960094678	0.965744534332917
13	56400001	56450000	EDN3	5.42037384753447	0.992867091294581
13	56425001	56475000	ZNF831	6.00886216425518	0.957561783463582
13	56450001	56500000	ZNF831	8.66866160031007	1.04339253510595
13	56475001	56525000	ZNF831	6.46363184136221	0.95040527749784
13	56500001	56550000	ZNF831	4.3264977297745	0.773391512798836
13	56800001	56850000	LOC102188874	6.47294259672403	0.636498474798393
13	56800001	56850000	LOC102190430	6.47294259672403	0.636498474798393
13	56800001	56850000	LOC108633189	6.47294259672403	0.636498474798393
13	61950001	62000000	BPIFA2	5.72008301447676	0.631143060364968
13	61950001	62000000	LOC102171351	5.72008301447676	0.631143060364968
13	61975001	62025000	LOC102171351	5.8492839136627	0.928904671230916
13	62650001	62700000	C13H20orf144	7.92015783231033	0.577352751885605
13	62650001	62700000	CBFA2T2	7.92015783231033	0.577352751885605
13	62650001	62700000	NECAB3	7.92015783231033	0.577352751885605
13	63775001	63825000	ACSS2	3.36462383411803	0.560177700604671
13	63775001	63825000	GSS	3.36462383411803	0.560177700604671
13	65150001	65200000	DLGAP4	5.68321242324398	0.693712186198508
13	65175001	65225000	DLGAP4	5.70020657585654	0.663604635857548
13	65175001	65225000	MYL9	5.70020657585654	0.663604635857548
13	72825001	72875000	PABPC1L	3.83586950006097	0.599034704259065
13	72825001	72875000	TOMM34	3.83586950006097	0.599034704259065
13	72825001	72875000	YWHAB	3.83586950006097	0.599034704259065
13	78750001	78800000	NFATC2	4.35871294332638	0.550501946305976
14	26550001	26600000	TMEM74	3.72541965254282	0.683212984043144
14	28875001	28925000	TRNAE	4.04862430823292	0.557338580935366
14	36475001	36525000	LOC106502867	5.02376805435724	0.484305871888739
14	36500001	36550000	LOC106502867	5.69904070735906	0.786855499164293
15	19475001	19525000	CCDC73	4.06607995045907	0.720719912178465
15	20725001	20775000	DCDC1	3.90749754587485	0.583280844278679
15	20725001	20775000	DNAJC24	3.90749754587485	0.583280844278679
15	33825001	33875000	LOC108637609	4.8334885999978	0.571581839252845
15	33850001	33900000	LOC102185386	5.09720157708041	0.938121977354732
15	33850001	33900000	LOC102185677	5.09720157708041	0.938121977354732
15	33850001	33900000	LOC108637609	5.09720157708041	0.938121977354732
15	66500001	66550000	PIWIL4	10.3077593594398	0.903101681301085
15	66525001	66575000	LOC102183984	10.2173235877951	0.881985161050394
15	81550001	81600000	LOC102183344	3.70704912739851	0.684665909176162
15	81575001	81625000	LOC102183344	3.73285206421425	0.789172451638602
15	950001	1000000	LOC102168904	3.42703828027822	0.577088216320281
15	950001	1000000	LOC102173289	3.42703828027822	0.577088216320281
16	850001	900000	LAX1	3.47956713313687	0.601607320207703
16	850001	900000	LOC108637762	3.47956713313687	0.601607320207703
16	875001	925000	ATP2B4	3.85387569129982	0.632107493045246
16	875001	925000	LAX1	3.85387569129982	0.632107493045246
16	875001	925000	LOC108637762	3.85387569129982	0.632107493045246
18	10050001	10100000	MPHOSPH6	3.80463393989933	0.519834117848378
18	51075001	51125000	LOC102169213	4.06306812350725	0.922290577766187
18	51825001	51875000	MEGF8	5.35404888412231	0.72270727329472
18	51825001	51875000	PAFAH1B3	5.35404888412231	0.72270727329472
18	51825001	51875000	PRR19	5.35404888412231	0.72270727329472
18	51825001	51875000	TMEM145	5.35404888412231	0.72270727329472
18	51850001	51900000	CIC	4.22628971315435	0.69208291654515
18	51850001	51900000	PAFAH1B3	4.22628971315435	0.69208291654515
18	51850001	51900000	PRR19	4.22628971315435	0.69208291654515
18	51850001	51900000	TMEM145	4.22628971315435	0.69208291654515
19	12350001	12400000	USP32	3.80924073972618	0.580109223244304
19	13300001	13350000	ACACA	5.38600501578586	0.527044133818911
19	13300001	13350000	C19H17orf78	5.38600501578586	0.527044133818911
19	13325001	13375000	C19H17orf78	4.73168561050263	0.498292974495488
19	13325001	13375000	TADA2A	4.73168561050263	0.498292974495488
19	51200001	51250000	RPTOR	4.88236601749282	0.520007179936431
19	51675001	51725000	CCDC40	6.1636635925316	0.671815434198559
19	51675001	51725000	EIF4A3	6.1636635925316	0.671815434198559
19	51675001	51725000	GAA	6.1636635925316	0.671815434198559
19	51700001	51750000	CCDC40	4.78069256894181	0.514938479139047
19	51700001	51750000	GAA	4.78069256894181	0.514938479139047
20	14200001	14250000	ADAMTS6	3.30363433834364	0.621030845681591
20	14225001	14275000	ADAMTS6	4.39819864236948	0.612058526635285
20	15200001	15250000	RNF180	6.20090661397885	0.947924910706357
20	15225001	15275000	RNF180	5.33818011846218	0.819462206982755
20	15275001	15325000	RNF180	3.73219626318442	0.569303822078402
20	18575001	18625000	DEPDC1B	4.8601254566416	0.839552306718686
20	18600001	18650000	DEPDC1B	4.07586838805249	0.755046207652866
20	40875001	40925000	NPR3	6.82998982407707	0.834449869574389
20	40900001	40950000	NPR3	5.39901578436537	0.643678488969378
21	30350001	30400000	CRABP1	3.72682841031061	0.484133693124768
21	45900001	45950000	MBIP	3.63500007351609	0.613173573038098
22	850001	900000	EGFR	3.47272575202319	0.51574884161278
23	33125001	33175000	MED20	6.33101429977394	0.598865857783233
24	26075001	26125000	DSG1	8.04872721939347	0.644896041854942
24	61375001	61425000	PHLPP1	5.27990288620624	0.815774228640935
24	61400001	61450000	PHLPP1	5.61958353073224	1.02341114609481
24	61425001	61475000	PHLPP1	4.77326825357939	0.786812010441584
24	62000001	62050000	LOC102180556	11.4371944663729	0.84809173374711
24	62000001	62050000	SERPINB12	11.4371944663729	0.84809173374711
24	62025001	62075000	LOC102180556	8.05050840737573	0.581210430377876
24	62025001	62075000	LOC102184299	8.05050840737573	0.581210430377876
24	62025001	62075000	LOC108633803	8.05050840737573	0.581210430377876
24	62025001	62075000	LOC108633804	8.05050840737573	0.581210430377876
25	18325001	18375000	ACSM3	4.89845338349623	0.549731530255714
25	18350001	18400000	ACSM3	6.8011669640005	0.828398699043637
25	18350001	18400000	ERI2	6.8011669640005	0.828398699043637
25	18375001	18425000	ACSM3	4.61893641122557	0.53251140264985
25	18375001	18425000	ERI2	4.61893641122557	0.53251140264985
25	36975001	37025000	LOC102190927	8.97356859763696	0.787644696795779
25	36975001	37025000	MEPCE	8.97356859763696	0.787644696795779
25	36975001	37025000	PPP1R35	8.97356859763696	0.787644696795779
25	36975001	37025000	ZCWPW1	8.97356859763696	0.787644696795779
25	37000001	37050000	LOC102190927	9.38575168934995	0.71671658978945
25	37000001	37050000	ZCWPW1	9.38575168934995	0.71671658978945
25	37850001	37900000	ARPC1B	5.10206745879559	0.635316598548648
25	37850001	37900000	BUD31	5.10206745879559	0.635316598548648
25	37850001	37900000	CPSF4	5.10206745879559	0.635316598548648
25	37850001	37900000	PDAP1	5.10206745879559	0.635316598548648
25	37850001	37900000	PTCD1	5.10206745879559	0.635316598548648
25	7600001	7650000	USP7	6.07290396852644	0.553887296499733
25	7625001	7675000	USP7	6.05663038741579	0.556551896667595
27	12250001	12300000	BAG4	3.36116671017064	0.614152836709926
27	12250001	12300000	DDHD2	3.36116671017064	0.614152836709926
27	12250001	12300000	LOC108634068	3.36116671017064	0.614152836709926
27	12250001	12300000	PLPP5	3.36116671017064	0.614152836709926
27	12275001	12325000	BAG4	4.36360311396858	0.599270790545638
27	12275001	12325000	DDHD2	4.36360311396858	0.599270790545638
27	12275001	12325000	LOC106503669	4.36360311396858	0.599270790545638
27	12275001	12325000	LOC108634068	4.36360311396858	0.599270790545638
27	12275001	12325000	LSM1	4.36360311396858	0.599270790545638
27	12300001	12350000	BAG4	3.85577832391723	0.523597461955773
27	12300001	12350000	LOC106503669	3.85577832391723	0.523597461955773
27	12300001	12350000	LSM1	3.85577832391723	0.523597461955773
27	7750001	7800000	INTS10	7.50586970025466	1.08526600289375
27	7775001	7825000	HGSNAT	6.81136831335344	0.921410243411755
27	7775001	7825000	INTS10	6.81136831335344	0.921410243411755
28	43575001	43625000	TAF5L	4.66026806872301	0.819089791385937
28	43575001	43625000	URB2	4.66026806872301	0.819089791385937
28	43600001	43650000	LOC106503685	4.32380975518309	0.667110103658037
28	43600001	43650000	TAF5L	4.32380975518309	0.667110103658037
28	9825001	9875000	SH2D4B	3.90443714106897	0.5280664973073
28	9850001	9900000	SH2D4B	6.18560458994944	0.897426016248753
29	45975001	46025000	ANO9	3.64751696724598	0.999681443249552
29	45975001	46025000	PKP3	3.64751696724598	0.999681443249552
29	45975001	46025000	SIGIRR	3.64751696724598	0.999681443249552

## Sheet: Table S8
Table S8. The top 5% of candidate genes under selection in sheep by FST
Chrom	Gene
1	A4GNT
1	ABCC5
1	ABHD10
1	ACP3
1	ADAMTS4
1	ADCY10
1	ADGRL4
1	AGAP1
1	AGBL4
1	AK4
1	AKR1A1
1	ALDH9A1
1	ALG6
1	AMOTL2
1	ANKRD13C
1	APOA2
1	AQP10
1	ARHGAP30
1	ARHGEF11
1	ARMC8
1	ARNT
1	ASB17
1	ASH1L
1	ASTE1
1	ATF6
1	ATG3
1	ATP5PF
1	ATP8B2
1	BCAR3
1	BFSP2
1	BTBD19
1	C1H1orf226
1	C2CD4D
1	CACHD1
1	CAPZA1
1	CBLB
1	CCDC163
1	CCDC30
1	CCDC54
1	CD1
1	CD244
1	CD247
1	CD86
1	CDV3
1	CEP63
1	CEP70
1	CEP97
1	CFAP144
1	CFAP298
1	CFAP57
1	CIP2A
1	CLIC6
1	CLSTN2
1	CPNE4
1	CREG1
1	CRYZ
1	CTH
1	CTSK
1	CZIB
1	DAB1
1	DAP3
1	DBR1
1	DEDD
1	DENND4B
1	DIP2A
1	DMAP1
1	DOCK7
1	DPYD
1	DTX3L
1	DUSP12
1	DYNLT4
1	DZIP1L
1	DZIP3
1	EBNA1BP2
1	EIF2B3
1	ELAVL4
1	EPS15
1	ERI3
1	ESYT3
1	ETV3L
1	EVI5
1	FAM78B
1	FCER1G
1	FCGR2B
1	FCGR3A
1	FCRLA
1	FCRLB
1	FOXD3
1	GABPA
1	GAP43
1	GATAD2B
1	GIGYF2
1	GK5
1	GLIS1
1	GLMN
1	GNAI3
1	GNAT2
1	GPA33
1	GPBP1L1
1	GPR61
1	HAX1
1	HDAC4
1	HECTD3
1	HEG1
1	HEYL
1	HOOK1
1	HS2ST1
1	HSPA6
1	HUNK
1	IFNAR1
1	IL12RB2
1	IL23R
1	ILDR2
1	IQCG
1	IQGAP3
1	ITGB3BP
1	ITLN
1	JAK1
1	JAM2
1	KANK4
1	KCNJ13
1	KLHDC9
1	KY
1	LEPR
1	LINGO4
1	LMLN
1	LMX1A
1	LOC100125357
1	LOC101103772
1	LOC101104027
1	LOC101105114
1	LOC101105373
1	LOC101105378
1	LOC101105621
1	LOC101105704
1	LOC101106046
1	LOC101106296
1	LOC101106730
1	LOC101107754
1	LOC101108173
1	LOC101108434
1	LOC101108528
1	LOC101110546
1	LOC101111513
1	LOC101114089
1	LOC101114575
1	LOC101114658
1	LOC101115328
1	LOC101115586
1	LOC101115597
1	LOC101115653
1	LOC101115849
1	LOC101116196
1	LOC101116371
1	LOC101116626
1	LOC101117028
1	LOC101117979
1	LOC101118497
1	LOC101121563
1	LOC101121646
1	LOC101121820
1	LOC101122151
1	LOC105602104
1	LOC105602127
1	LOC105604745
1	LOC105608026
1	LOC105609515
1	LOC105609869
1	LOC105611362
1	LOC105612995
1	LOC105613604
1	LOC105615960
1	LOC106990819
1	LOC114109376
1	LOC114110945
1	LOC114110971
1	LOC114111020
1	LOC114111027
1	LOC114111032
1	LOC114111057
1	LOC114111067
1	LOC114111071
1	LOC114111077
1	LOC114111081
1	LOC114111156
1	LOC114111198
1	LOC114111238
1	LOC114111239
1	LOC114111257
1	LOC114111320
1	LOC114112886
1	LOC114113098
1	LOC114113396
1	LOC114113766
1	LOC114114887
1	LOC114115268
1	LOC114117337
1	LOC114117862
1	LOC114117969
1	LOC114118004
1	LOC114118459
1	LOC114118461
1	LOC121816219
1	LOC121816352
1	LOC121816356
1	LOC121817295
1	LOC121817474
1	LOC121817520
1	LOC121817808
1	LOC121817852
1	LOC121819112
1	LOC121819116
1	LOC121819166
1	LOC121819445
1	LOC121819452
1	LOC121819525
1	LOC121819822
1	LOC121820359
1	LOC121820608
1	LOC121820609
1	LOC121820706
1	LOC121820741
1	LOC121820785
1	LOC132657259
1	LOC132657349
1	LOC132657359
1	LOC132657429
1	LOC132657490
1	LOC132657679
1	LOC132657857
1	LOC132657858
1	LOC132657904
1	LOC132658207
1	LOC132658260
1	LOC132658292
1	LOC132658372
1	LOC132658373
1	LOC132658540
1	LOC132658547
1	LOC132659276
1	LOC132659287
1	LOC132659857
1	LOC132659959
1	LOC132659968
1	LOC132659969
1	LOC132660066
1	LOC132660228
1	LOC443423
1	LOC443441
1	LRP8
1	LRRC31
1	LRRC53
1	LSAMP
1	MAEL
1	MAGOH
1	MECOM
1	MEF2D
1	MFSD2A
1	MGST3
1	MMACHC
1	MPZL1
1	MRAS
1	MSH4
1	MYCL
1	MYH15
1	NAALADL2
1	NAXE
1	NCAM2
1	NDUFA10
1	NDUFS2
1	NECTIN4
1	NEK11
1	NIT1
1	NME9
1	NOTCH2
1	NR1I3
1	NUF2
1	NUP210L
1	OLFML2B
1	OLIG2
1	OSBPL11
1	OSBPL9
1	PABPC4
1	PARP14
1	PARP9
1	PATJ
1	PBX1
1	PCNP
1	PDE4B
1	PFDN2
1	PHLDB2
1	PLK3
1	PODN
1	POU2F1
1	POU3F1
1	PPM1L
1	PRDX1
1	PRKACB
1	PTCH2
1	RAVER2
1	RCSD1
1	RLF
1	RNF220
1	ROBO2
1	ROR1
1	RORC
1	RPAP2
1	RPL24
1	RPL35A
1	RXRG
1	RYK
1	S100A5
1	S100A6
1	SFPQ
1	SFT2D2
1	SH2D1B
1	SLC12A8
1	SLC1A7
1	SLC2A1
1	SLC9A9
1	SNX4
1	SST
1	ST3GAL6
1	ST6GALNAC3
1	ST7L
1	STYXL2
1	SYCP1
1	SYNJ1
1	TAGLN3
1	TBC1D23
1	TBX19
1	TESK2
1	TEX55
1	TFDP2
1	TGFBR3
1	THEM4
1	THEM5
1	TIAM1
1	TM2D1
1	TM4SF4
1	TMCO1
1	TMCO2
1	TMPRSS7
1	TNNI3K
1	TOMM40L
1	TPM3
1	TRABD2B
1	TRNAC
1	TRNAC
1	TRNAD
1	TRNAE
1	TRNAE
1	TRNAG
1	TRNAG
1	TRNAL
1	TRNAN
1	TRNAP
1	TRNAP
1	TRNAS
1	TRNAS
1	TRNAW
1	TRNAY
1	TRNAY
1	TSHB
1	TSPAN2
1	TSPEAR
1	TTC24
1	TYW3
1	UAP1
1	UBAP2L
1	UBE2G2
1	UCK2
1	UHMK1
1	UROD
1	USP1
1	WARS2
1	ZBTB11
1	ZBTB20
1	ZBTB38
1	ZFYVE9
1	ZMPSTE24
1	ZMYM1
1	ZNF691
1	ZSWIM5
2	ABCB11
2	ADAMTSL1
2	AK2
2	AMER3
2	AMMECR1L
2	ANKAR
2	ANXA10
2	AOPEP
2	ARHGEF4
2	ARID3C
2	ARL6IP6
2	ASDURF
2	ASNSD1
2	ATOSB
2	ATP6V1B2
2	AUH
2	B3GALT1
2	B3GNT7
2	BARD1
2	BNC2
2	C2H2orf69
2	C2H2orf72
2	C2H2orf88
2	CARD19
2	CBR4
2	CCDC150
2	CCDC171
2	CCDC25
2	CCDC28B
2	CCDC93
2	CCIN
2	CCL19
2	CCL21
2	CCL27
2	CDCA7
2	CDK15
2	CER1
2	CERKL
2	CERS6
2	CFAP210
2	CFAP221
2	CLASP1
2	CLTA
2	CNTFR
2	CNTLN
2	CNTNAP5
2	COL15A1
2	COL3A1
2	COL5A2
2	CXCR2
2	DARS1
2	DCDC2B
2	DEFB134
2	DEFB136
2	DHRS9
2	DIS3L2
2	DMRT1
2	DNAI1
2	DOCK8
2	DPP10
2	ECE1
2	EIF3I
2	EIF4G3
2	ELAVL2
2	ELOA
2	EN1
2	ENHO
2	ENTREP1
2	EPB41L5
2	ERCC6L2
2	ESCO2
2	FAM167B
2	FAM221B
2	FANCG
2	FGD3
2	FOXD4
2	FREM1
2	FTCDNL1
2	FZD3
2	GABBR2
2	GALE
2	GALNTL6
2	GALT
2	GCNT1
2	GDA
2	GLDC
2	GLI2
2	GLIPR2
2	GLIS3
2	GLRA3
2	GNAQ
2	GNE
2	GORASP2
2	GRB14
2	GTDC1
2	GTF3C3
2	GULP1
2	HAUS6
2	HERC2
2	HIBCH
2	HINT2
2	HMGCL
2	HNRNPR
2	HRCT1
2	HS6ST1
2	HTR2B
2	IFT74
2	IHH
2	IL11RA
2	IL33
2	INSIG2
2	IQCC
2	ITGA4
2	ITPRID2
2	IWS1
2	KANK1
2	KHDRBS1
2	KIF5C
2	KLHL23
2	KLHL9
2	KPNA6
2	LCK
2	LINGO2
2	LOC100147796
2	LOC101102963
2	LOC101105632
2	LOC101106919
2	LOC101107417
2	LOC101108371
2	LOC101108811
2	LOC101110740
2	LOC101111607
2	LOC101111942
2	LOC101112201
2	LOC101115261
2	LOC101115435
2	LOC101116458
2	LOC101116964
2	LOC101118164
2	LOC101120890
2	LOC101121661
2	LOC105601854
2	LOC105601956
2	LOC105607956
2	LOC105608311
2	LOC105608393
2	LOC105608622
2	LOC105608693
2	LOC105608734
2	LOC105608783
2	LOC105608837
2	LOC105609277
2	LOC105609873
2	LOC106990496
2	LOC106990930
2	LOC114112248
2	LOC114112800
2	LOC114112837
2	LOC114112903
2	LOC114112952
2	LOC114112973
2	LOC114113035
2	LOC114113036
2	LOC114113039
2	LOC114113042
2	LOC114113058
2	LOC114113270
2	LOC114113314
2	LOC114113320
2	LOC114113323
2	LOC114113327
2	LOC114113328
2	LOC114113342
2	LOC114113384
2	LOC114113385
2	LOC114113390
2	LOC114113391
2	LOC114113404
2	LOC114113405
2	LOC114113418
2	LOC114113423
2	LOC114113426
2	LOC114113467
2	LOC114113468
2	LOC121818528
2	LOC121818545
2	LOC121818550
2	LOC121818555
2	LOC121818564
2	LOC121818596
2	LOC121818620
2	LOC121818625
2	LOC121818626
2	LOC121818630
2	LOC121818641
2	LOC121818649
2	LOC121818650
2	LOC121818661
2	LOC121818676
2	LOC121818679
2	LOC121818687
2	LOC121818706
2	LOC121818721
2	LOC121818747
2	LOC121818753
2	LOC121818768
2	LOC121818807
2	LOC121818813
2	LOC121818816
2	LOC132659122
2	LOC132659130
2	LOC132659133
2	LOC132659136
2	LOC132659164
2	LOC132659177
2	LOC132659184
2	LOC132659188
2	LOC132659191
2	LOC132659192
2	LOC132659193
2	LOC132659233
2	LOC132659237
2	LOC132659247
2	LOC132659263
2	LOC132659286
2	LOC132659291
2	LOC132659297
2	LOC132659301
2	LOC132659305
2	LOC132659306
2	LOC132659307
2	LOC132659313
2	LOC132659321
2	LOC132659323
2	LOC132659324
2	LOC132659330
2	LOC132659332
2	LOC132659347
2	LRRC19
2	LYPLA2
2	MAP3K20
2	MARCHF4
2	MECR
2	METTL5
2	MFSD6
2	MPDZ
2	MSRA
2	MTMR9
2	MYO7B
2	NAB1
2	NCKAP5
2	NEMP2
2	NFIB
2	NHEJ1
2	NINJ1
2	NPR2
2	OCA2
2	ORMDL1
2	OSGEPL1
2	OSTF1
2	PALLD
2	PALM2AKAP2
2	PBK
2	PDE1A
2	PEBP4
2	PECR
2	PGM5
2	PHC2
2	PHOSPHO2
2	PIGO
2	PITHD1
2	PLAA
2	PLEKHB2
2	PMS1
2	POLR2D
2	PPP1R1C
2	PRKAG3
2	PROC
2	PSIP1
2	PSMD1
2	PTP4A2
2	PTPN18
2	PTPN4
2	PTPRD
2	PTPRU
2	PUM1
2	PXDN
2	R3HDM1
2	RAB3GAP1
2	RALB
2	RBBP4
2	RECK
2	RGS3
2	RNF19B
2	RNF25
2	RORB
2	RPP25L
2	RRAGA
2	RUFY4
2	SAP130
2	SAXO1
2	SCTR
2	SDC3
2	SERINC2
2	SESTD1
2	SFT2D3
2	SH3GL2
2	SH3RF1
2	SIGMAR1
2	SLC25A37
2	SLC28A3
2	SLC40A1
2	SLC4A10
2	SNAPC3
2	SNTG2
2	SPAAR
2	SPAG8
2	SPATA3
2	SPATA31G1
2	SRSF4
2	SSB
2	STEAP3
2	STK36
2	STK39
2	STOML2
2	SUSD3
2	SYNC
2	TGFBR1
2	THSD7B
2	TJP2
2	TLK1
2	TMEM163
2	TMEM169
2	TMEM177
2	TMEM234
2	TMEM39B
2	TMEM8B
2	TNS1
2	TPO
2	TRNAA
2	TRNAC
2	TRNAC
2	TRNAE
2	TRNAE
2	TRNAG
2	TRNAG
2	TRNAH
2	TRNAR
2	TRNAS
2	TRNAT
2	TRNAW
2	TRNAY
2	TTC21B
2	TTC39B
2	TTLL4
2	TXLNA
2	UBR3
2	UGGT1
2	UHRF2
2	UNC13B
2	VCP
2	WDR33
2	WDR75
2	WNT10A
2	WNT6
2	XRCC5
2	ZCCHC17
2	ZDHHC21
2	ZEB2
2	ZNF142
2	ZNF462
2	ZNF804A
2	ZNG1A
2	ZRANB3
3	ABCD2
3	ABTB3
3	ACOXL
3	ACYP2
3	AFF3
3	AGBL5
3	ALX1
3	AMIGO2
3	ANO2
3	APOF
3	ARID2
3	ASPRV1
3	ATP6V1E1
3	ATXN7L3B
3	BCL11A
3	BCL2L13
3	C3H12orf42
3	C3H2orf15
3	C3H2orf68
3	CEP83
3	CHPT1
3	CREG2
3	CSNK1E
3	CYRIA
3	DDX17
3	DMC1
3	DNMT3A
3	E2F7
3	EFEMP1
3	EMILIN1
3	EML4
3	ETAA1
3	FAM228B
3	FBLN7
3	FKBP1B
3	FOXN2
3	GEN1
3	GGCX
3	GLS2
3	GLT8D2
3	GNPTAB
3	GREB1
3	GTF2A1L
3	HDAC7
3	HMGA2
3	ID2
3	ITSN2
3	KCNA1
3	KDELR3
3	KHK
3	KIDINS220
3	KITLG
3	KLRF1
3	LDAH
3	LIPT1
3	LOC101102714
3	LOC101102969
3	LOC101106246
3	LOC101107947
3	LOC101113221
3	LOC101115694
3	LOC101116981
3	LOC101117240
3	LOC101117325
3	LOC101119032
3	LOC101119548
3	LOC101120997
3	LOC105606932
3	LOC105607483
3	LOC105609280
3	LOC105611140
3	LOC105611708
3	LOC105614148
3	LOC105614674
3	LOC105614699
3	LOC106990986
3	LOC106991077
3	LOC114108643
3	LOC114113611
3	LOC114113899
3	LOC114113902
3	LOC114113931
3	LOC114113961
3	LOC114114146
3	LOC114114175
3	LOC114114296
3	LOC121819008
3	LOC121819037
3	LOC121819049
3	LOC121819066
3	LOC121819072
3	LOC121819095
3	LOC121819117
3	LOC121819119
3	LOC121819126
3	LOC121819133
3	LOC121819268
3	LOC121819274
3	LOC132659409
3	LOC132659421
3	LOC132659424
3	LOC132659495
3	LOC132659496
3	LOC132659501
3	LOC132659502
3	LOC132659560
3	LOC132659562
3	LOC132659565
3	LOC132659566
3	LOC132659569
3	LOC132659578
3	LOC132659590
3	LOC132659623
3	LOC132659628
3	LOC132659647
3	LONRF2
3	LPIN1
3	LRP1
3	LRRIQ1
3	MAFF
3	MAPRE3
3	MED21
3	MFSD2B
3	MICAL3
3	MIP
3	MITD1
3	MLC1
3	MOV10L1
3	MRPL30
3	MSGN1
3	MSRB3
3	MXD1
3	MYF5
3	MYF6
3	MYRFL
3	NAP1L1
3	NAV3
3	NDUFA4L2
3	NELL2
3	NPAS2
3	NRXN1
3	NTS
3	NTSR2
3	NXPH4
3	OSBPL8
3	OST4
3	PANX2
3	PAPOLG
3	PAWR
3	PBX3
3	PCED1B
3	PFN4
3	PHLDA1
3	PPFIA2
3	PPP1CB
3	PPP1R12A
3	PPP1R21
3	PREB
3	PRKCE
3	PSME4
3	PTPRQ
3	PTPRR
3	R3HDM2
3	RAB21
3	RAB3IP
3	RASGRP3
3	RASSF3
3	RASSF9
3	RBMS2
3	REDIC1
3	RFX8
3	RNF149
3	RNF181
3	RPL31
3	SCAF11
3	SETX
3	SF3B6
3	SHMT2
3	SLC2A13
3	SLC30A6
3	SLC38A2
3	SLC8A1
3	SOCS2
3	SOCS5
3	SOX5
3	SPAST
3	SPDYA
3	SPRYD4
3	STAC3
3	STAT2
3	STON1
3	STRBP
3	SYCP3
3	SYT1
3	TBC1D15
3	TBC1D8
3	TDG
3	TEAD4
3	TGFA
3	TIMELESS
3	TM7SF3
3	TMEM150A
3	TMEM184B
3	TMEM214
3	TNRC6B
3	TOGARAM2
3	TP53I3
3	TRHDE
3	TRMT61B
3	TRNAA
3	TRNAC
3	TRNAC
3	TRNAE
3	TRNAG
3	TRNAL
3	TRNAQ
3	TRNAR
3	TRNAS
3	TRNAW
3	TRNAY
3	TSGA10
3	TSPAN9
3	TTC27
3	TULP3
3	UBXN2A
3	USP39
3	VAMP5
3	VAMP8
3	VDR
3	VWF
3	WDCP
3	WDPCP
3	WDR43
3	YAF2
3	YEATS4
3	ZBTB34
3	ZBTB43
3	ZC3H6
3	ZC3H8
4	ABCA13
4	ACTR3B
4	AGMO
4	AHCYL2
4	ATP6V1F
4	ATXN7L1
4	BMT2
4	BZW2
4	C4H7orf57
4	CASP2
4	CDHR3
4	CFAP69
4	CHN2
4	CLCN1
4	CLDN12
4	COPG2
4	CPED1
4	CPVL
4	CRPPA
4	DDC
4	DGKB
4	DLX6
4	DNAH11
4	EFCAB10
4	EVX1
4	FIGNL1
4	FLNC
4	GSDME
4	HDAC9
4	HIPK2
4	HOXA10
4	HOXA3
4	HOXA4
4	HOXA5
4	HOXA6
4	HOXA7
4	HOXA9
4	IGF2BP3
4	IKZF1
4	KCND2
4	KCP
4	LOC101104822
4	LOC101106767
4	LOC101119206
4	LOC101121769
4	LOC105609418
4	LOC105609617
4	LOC105612556
4	LOC114114478
4	LOC114114483
4	LOC114114485
4	LOC114114527
4	LOC114114534
4	LOC114114541
4	LOC114114636
4	LOC114114653
4	LOC114114660
4	LOC121819374
4	LOC121819375
4	LOC121819381
4	LOC121819382
4	LOC121819397
4	LOC121819410
4	LOC121819411
4	LOC121819412
4	LOC121819413
4	LOC132659657
4	LOC132659696
4	LOC132659698
4	LOC132659703
4	LOC132659741
4	LOC132659744
4	LOC132659751
4	LOC132659760
4	LOC132659761
4	LOC132659762
4	MEST
4	MIR148A
4	NME8
4	NRCAM
4	PARP12
4	PHF14
4	PNPLA8
4	POLE3
4	PUS7
4	RINT1
4	RUNDC3B
4	SCIN
4	SMO
4	SNX13
4	SPMIP1
4	STEAP2
4	SUGCT
4	SUN3
4	TAX1BP1
4	TFEC
4	TMEM196
4	TNS3
4	TRIM24
4	TRNAC
4	TRNAE
4	TRNAS
4	TRNAS
4	TSGA13
4	TSPAN12
4	TSPAN33
4	ZNF777
4	ZPBP
5	ABLIM3
5	ACER1
5	ADAMTS2
5	ALKBH7
5	ANGPTL8
5	ARMC6
5	ARRDC3
5	ARSI
5	B3GNT3
5	C3
5	CAMK2A
5	CERS1
5	CLINT1
5	CLK4
5	CLPP
5	COL23A1
5	COLGALT1
5	COMMD10
5	COPE
5	CSF2
5	CYSTM1
5	DDX49
5	DOCK6
5	ECSCR
5	FAM114A2
5	FCHO1
5	FER
5	FGFR4
5	GABRB2
5	GALNT10
5	GDF1
5	GPR108
5	GRIA1
5	GTF2F1
5	HAUS8
5	HBEGF
5	HOMER3
5	HSD17B4
5	IER2
5	IGIP
5	IL3
5	IL5
5	IQCN
5	IRF1
5	JUND
5	KANK2
5	LOC101102391
5	LOC101102643
5	LOC101108654
5	LOC101112316
5	LOC101118184
5	LOC101118441
5	LOC101119041
5	LOC105609426
5	LOC105611547
5	LOC105613357
5	LOC105615197
5	LOC106990140
5	LOC114108666
5	LOC114108689
5	LOC114114824
5	LOC114114850
5	LOC114114894
5	LOC114114907
5	LOC114114917
5	LOC114114921
5	LOC114114982
5	LOC114115046
5	LOC114115052
5	LOC114115075
5	LOC114115078
5	LOC114115113
5	LOC114115132
5	LOC121819632
5	LOC121819661
5	LOC121819662
5	LOC121819669
5	LOC121819690
5	LOC121819724
5	LOC132657132
5	LOC132659794
5	LOC132659798
5	LOC132659804
5	LOC132659812
5	LOC132659813
5	LOC132659819
5	LOC132659823
5	LOC132659826
5	LOC132659840
5	LOC132659845
5	LOC132659852
5	LOC132659859
5	LOC132659862
5	LOC132659894
5	LSM4
5	LYL1
5	MACIR
5	MCTP1
5	MFAP3
5	MYO9B
5	NACC1
5	NFIX
5	NIBAN3
5	NSD1
5	OLFM2
5	PAM
5	PGLS
5	PIN1
5	PPIP5K2
5	PPP2R2B
5	PSPN
5	PURA
5	RAD50
5	RASGRF2
5	RHOBTB3
5	RPL18A
5	SAFB2
5	SAP30L
5	SH2D3A
5	SLC25A46
5	SLC4A9
5	SLC5A5
5	SMAD5
5	SMIM33
5	SPATA9
5	SPINK14
5	SPINK5
5	SPRY4
5	STING1
5	STX10
5	SUGP2
5	TINCR
5	TMEM232
5	TNFSF14
5	TRIP10
5	TRMT1
5	TRNAC
5	TRNAE
5	TRNAG
5	TRNAG
5	TRNAM
5	TRNAS
5	TRNAW
5	UBE2D2
5	UBL5
5	UPF1
5	VAV1
5	XRCC4
5	ZFP62
5	ZNF300
5	ZNF354C
5	ZNF879
6	ADD1
6	ADGRL3
6	AFM
6	AIMP1
6	ANAPC4
6	ANKRD17
6	ARAP2
6	ATOH1
6	ATP5ME
6	ATP8A1
6	CFAP299
6	CLNK
6	COL25A1
6	COPS4
6	CPLX1
6	CSN3
6	CXXC4
6	DGKQ
6	ELOVL6
6	EPHA5
6	EREG
6	FAM193A
6	FGFRL1
6	FRAS1
6	GABRB1
6	GABRG1
6	GAK
6	GIMD1
6	GRID2
6	HPGDS
6	HS3ST1
6	IDUA
6	KLHL8
6	LGI2
6	LIN54
6	LOC101102731
6	LOC101102814
6	LOC101103238
6	LOC101105412
6	LOC101118447
6	LOC101120329
6	LOC105607312
6	LOC114115302
6	LOC114115331
6	LOC114115353
6	LOC114115366
6	LOC114115410
6	LOC114115418
6	LOC114115432
6	LOC114115448
6	LOC114115487
6	LOC121819808
6	LOC121819832
6	LOC121819841
6	LOC121819860
6	LOC121819861
6	LOC121819875
6	LOC121819876
6	LOC121819882
6	LOC121819885
6	LOC132659944
6	LOC132659977
6	LOC132659979
6	LOC132660002
6	LOC132660030
6	LOC132660031
6	MRPL1
6	NPNT
6	NWD2
6	PARM1
6	PCDH7
6	PCGF3
6	PDE6B
6	PDS5A
6	PLAC8
6	RAB28
6	RASGEF1B
6	RASSF6
6	RBM47
6	RNF212
6	SCFD2
6	SEC24B
6	SEPSECS
6	SGMS2
6	SH3BP2
6	SLC26A1
6	SLC49A3
6	SMARCAD1
6	SORCS2
6	TAPT1
6	TBC1D1
6	TBCK
6	TMEM175
6	TNIP2
6	TRNAC
6	TRNAS
6	UBE2K
6	UNC5C
6	ZCCHC4
7	ADAM10
7	ADCK1
7	AKAP5
7	ALDH1A2
7	ANGEL1
7	AP1G2
7	AQP9
7	ARIH1
7	ARPP19
7	ATP8B4
7	BBS4
7	BLOC1S6
7	C7H15orf62
7	CALML4
7	CCDC175
7	CCPG1
7	CEP152
7	CERT1
7	CLN6
7	DAAM1
7	DMXL2
7	DNAAF4
7	DNAJC17
7	DUOX1
7	DUOX2
7	DUOXA1
7	DUOXA2
7	EIF2AK4
7	EIF3J
7	EML5
7	ESRRB
7	FAM227B
7	FAM98B
7	FBN1
7	FERMT2
7	FMN1
7	FSIP1
7	GATM
7	GCHFR
7	GPR135
7	GPR176
7	HIF1A
7	HSPA2
7	ISM2
7	JMJD7
7	JPH4
7	KCNN2
7	L3HYPDH
7	LOC101109541
7	LOC101115626
7	LOC101116732
7	LOC101116991
7	LOC101118279
7	LOC101118533
7	LOC101118791
7	LOC101119313
7	LOC101120336
7	LOC101120583
7	LOC101121100
7	LOC101121354
7	LOC101121938
7	LOC105601958
7	LOC105608741
7	LOC105610613
7	LOC106991282
7	LOC114108595
7	LOC114115604
7	LOC114115633
7	LOC114115902
7	LOC114115905
7	LOC114115912
7	LOC114115913
7	LOC114115918
7	LOC114115922
7	LOC114115923
7	LOC114115953
7	LOC114115965
7	LOC114115985
7	LOC114115989
7	LOC121819957
7	LOC121819958
7	LOC121819974
7	LOC121819982
7	LOC121819984
7	LOC121820009
7	LOC121820028
7	LOC121820036
7	LOC121820040
7	LOC121820043
7	LOC121820045
7	LOC121820080
7	LOC121820089
7	LOC132660041
7	LOC132660044
7	LOC132660045
7	LOC132660046
7	LOC132660050
7	LOC132660051
7	LOC132660053
7	LOC132660055
7	LOC132660067
7	LOC132660087
7	LOC132660115
7	LOC132660122
7	LOC132660130
7	LOC132660146
7	LOC442995
7	LRRC74A
7	LTBP2
7	LYSMD2
7	MAPK6
7	MAPKBP1
7	MDGA2
7	MEIS2
7	MGA
7	MNAT1
7	MTHFD1
7	MYO5A
7	NDUFAF1
7	NEDD4
7	NEMF
7	NGDN
7	NREP
7	NUSAP1
7	OIP5
7	ONECUT1
7	PELI2
7	PIGB
7	PIGBOS1
7	PLA2G4B
7	PPP1R14D
7	PPP1R36
7	PRTG
7	PTGDR
7	PYGO1
7	RAB27A
7	RAD51
7	RASGRP1
7	RFX7
7	RMDN3
7	RNF212B
7	RSL24D1
7	SAMD4A
7	SHC4
7	SHF
7	SLC28A2
7	SLC30A4
7	SLC7A8
7	SLTM
7	SNAPC1
7	SORD
7	SPG11
7	SPRED1
7	SPTLC2
7	SQOR
7	TBCA
7	TEX9
7	THTPA
7	TMOD2
7	TRNAC
7	TRNAC
7	TRNAH
7	TRNAS
7	TRPM7
7	TTBK2
7	TTC5
7	UBR1
7	UNC13C
7	USP50
7	YLPM1
7	YTHDC2
7	ZC3H14
7	ZFHX2
7	ZFYVE19
7	ZNF280D
8	ADGRG6
8	AIG1
8	AKAP12
8	ANKRD6
8	ARHGAP18
8	ARID1B
8	ASCC3
8	BVES
8	CCDC170
8	CNR1
8	DLL1
8	EZR
8	FAM120B
8	FYN
8	GRIK2
8	LIN28B
8	LOC105611302
8	LOC114116072
8	LOC114116179
8	LOC114116180
8	LOC114116235
8	LOC114116285
8	LOC121820177
8	LOC121820205
8	LOC121820207
8	LOC121820226
8	LOC132660188
8	LOC132660241
8	LOC132660246
8	LOC132660257
8	LYRM2
8	MAN1A1
8	MDN1
8	NCOA7
8	OPRM1
8	OSTM1
8	PTPRK
8	RARS2
8	RNGTT
8	SERINC1
8	SLC35A1
8	SNAP91
8	TBXT
8	THEMIS
8	TRMT11
8	TRNAC
8	TRNAF
8	TRNAL
8	TRNAQ
8	TRNAS
8	TRNAV
8	TRNAY
8	UST
8	VTA1
9	ADCY8
9	ADGRB3
9	ANXA13
9	C9H8orf76
9	CNBD1
9	CSMD3
9	CTHRC1
9	DCAF13
9	DERL1
9	DPYS
9	ELOC
9	EXT1
9	EYA1
9	FAM135A
9	FAM83A
9	FER1L6
9	FSBP
9	HAS2
9	KCNB2
9	KLF10
9	KLHL38
9	LACTB2
9	LOC101109545
9	LOC101114620
9	LOC101115217
9	LOC101121611
9	LOC105607365
9	LOC105609073
9	LOC105616014
9	LOC106991348
9	LOC114116360
9	LOC114116509
9	LOC114116519
9	LOC121816003
9	LOC121820331
9	LOC121820340
9	LOC121820352
9	LOC121820391
9	LOC132657210
9	LOC132657211
9	LOC132657212
9	LOC132657213
9	LOC132657222
9	LY96
9	MCM4
9	MTSS1
9	NBN
9	NCALD
9	NCOA2
9	NIPAL2
9	NSMCE2
9	OSGIN2
9	PEX2
9	POP1
9	PRKDC
9	RAD54B
9	RIDA
9	RIMS2
9	RNF139
9	RRM2B
9	SDHAF4
9	SLC25A32
9	STK3
9	TATDN1
9	TBC1D31
9	TMEM64
9	TMEM65
9	TMEM70
9	TRAM1
9	TRMT12
9	TRNAC
9	TRNAG
9	TRNAG
9	TRNAM
9	TRPA1
9	TRPS1
9	UBR5
9	VIRMA
9	WWP1
9	XKR9
9	ZFHX4
9	ZFPM2
9	ZHX1
10	ARHGEF7
10	BRCA2
10	CRYL1
10	DACH1
10	DGKH
10	DOCK9
10	EEF1AKMT1
10	ENOX1
10	ERICH6B
10	F10
10	F7
10	FAM124A
10	FRY
10	GGACT
10	GJA3
10	GJB2
10	GJB6
10	GPALPP1
10	HMGB1
10	IFT88
10	IL17D
10	ITGBL1
10	KATNAL1
10	LACC1
10	LATS2
10	LOC101106088
10	LOC101106534
10	LOC101112491
10	LOC105607399
10	LOC105608010
10	LOC105611671
10	LOC105611675
10	LOC114116728
10	LOC121820433
10	LOC121820448
10	LOC121820449
10	LOC132657251
10	LOC132657290
10	LOC132657294
10	LOC132657297
10	LOC132657298
10	MAB21L1
10	MCF2L
10	MEDAG
10	MICU2
10	MYO16
10	N4BP2L1
10	N4BP2L2
10	NBEA
10	NUFIP1
10	PCCA
10	PCDH17
10	PCID2
10	PDS5B
10	PROZ
10	RFC3
10	RNASEH2B
10	STARD13
10	TEX26
10	TMTC4
10	TRNAC
10	TRNAC
10	TRNAE
10	TRNAN
10	TRNAR
10	TRNAY
10	USPL1
10	VWA8
10	XPO4
10	ZAR1L
10	ZMYM2
11	AARSD1
11	AATF
11	ABR
11	ACACA
11	ACOX1
11	ADPRM
11	ALOX12
11	ALOX15
11	AOC2
11	AOC3
11	ARHGAP23
11	ARHGAP44
11	ATXN7L3
11	BAIAP2
11	BCL6B
11	BECN1
11	BLMH
11	BRCA1
11	C11H17orf100
11	C11H17orf49
11	C1QTNF1
11	CA10
11	CA4
11	CACNB1
11	CAMTA2
11	CANT1
11	CCDC57
11	CDC42EP4
11	CDK12
11	CEP95
11	CHMP6
11	CNTD1
11	COPZ2
11	CRK
11	CSNK1D
11	DDX5
11	DNAH2
11	DNAH9
11	DPH1
11	DUSP14
11	EFNB3
11	ELAC2
11	ENDOV
11	ENGASE
11	ENO3
11	ERBB2
11	ERN1
11	EVI2A
11	EVI2B
11	FAM117A
11	FASN
11	FBF1
11	FBXO39
11	G6PC3
11	GALK1
11	GGA3
11	GGT6
11	GP1BA
11	GPR179
11	GPRC5C
11	GRB7
11	HDAC5
11	IFI35
11	IKZF3
11	INCA1
11	ITGB3
11	ITGB4
11	JPT1
11	KANSL1
11	KAT7
11	KIF1C
11	KRT222
11	LOC101102001
11	LOC101102254
11	LOC101103335
11	LOC101106344
11	LOC101112076
11	LOC101112584
11	LOC101112832
11	LOC101113251
11	LOC101113252
11	LOC101113508
11	LOC101114791
11	LOC101117600
11	LOC101120590
11	LOC105606280
11	LOC105606327
11	LOC105607815
11	LOC105608413
11	LOC105610170
11	LOC105612015
11	LOC105616378
11	LOC105616394
11	LOC114110093
11	LOC114116812
11	LOC114116813
11	LOC114116823
11	LOC114116836
11	LOC114116945
11	LOC114116953
11	LOC114116976
11	LOC114116977
11	LOC114117037
11	LOC114117056
11	LOC114117083
11	LOC114117088
11	LOC114117089
11	LOC114117115
11	LOC114117116
11	LOC114117117
11	LOC114117118
11	LOC114117119
11	LOC114117123
11	LOC114117124
11	LOC114117133
11	LOC114117139
11	LOC121820546
11	LOC121820559
11	LOC121820566
11	LOC121820586
11	LOC121820611
11	LOC121820616
11	LOC121820623
11	LOC121820639
11	LOC121820667
11	LOC121820694
11	LOC121820699
11	LOC121820715
11	LOC121820718
11	LOC132657313
11	LOC132657323
11	LOC132657335
11	LOC132657339
11	LOC132657340
11	LOC132657344
11	LOC132657347
11	LOC132657357
11	LOC132657367
11	LOC132657368
11	LOC132657374
11	LOC132657377
11	LOC132657403
11	LOC132657407
11	LOC132657410
11	LOC132657430
11	LOC132657439
11	LSM12
11	MAP2K4
11	MAPT
11	MED1
11	MED13
11	MED24
11	MIF4GD
11	MIR152
11	MPP2
11	MRPL38
11	MRPL45
11	MRPS7
11	MSI2
11	MSL1
11	MYBBP1A
11	MYH1
11	MYH10
11	MYH2
11	MYL4
11	NAGS
11	NDEL1
11	NEUROD2
11	NF1
11	NFE2L1
11	NPTX1
11	NR1D1
11	NSF
11	NSRP1
11	NUP85
11	NXPH3
11	OMG
11	PELP1
11	PFN1
11	PGAP3
11	PHB1
11	PNMT
11	POLDIP2
11	POLG2
11	PPP1R1B
11	PPY
11	PRR29
11	PSME3
11	PTGES3L
11	PYY
11	RBFOX3
11	RNASEK
11	RND2
11	RNF167
11	RNF213
11	RPL19
11	RPL27
11	RTN4RL1
11	RUNDC1
11	SAP30BP
11	SARM1
11	SDK2
11	SEBOX
11	SGSM2
11	SHISA6
11	SKAP1
11	SLC13A5
11	SLC16A11
11	SLC16A13
11	SLC16A3
11	SLC25A11
11	SLC25A19
11	SLC35B1
11	SLC46A1
11	SLC4A1
11	SLC6A4
11	SMARCE1
11	SMG6
11	SMTNL2
11	SMURF2
11	SOCS7
11	SPAG7
11	SPAG9
11	SPNS2
11	SPNS3
11	SPOP
11	SRR
11	SSH2
11	STAC2
11	STARD3
11	SUMO2
11	SYNRG
11	TAC4
11	TADA2A
11	TANC2
11	TCAP
11	TEKT1
11	THRA
11	TMEM101
11	TMEM199
11	TMEM220
11	TMIGD1
11	TNFAIP1
11	TRIM47
11	TRIM65
11	TRNAA
11	TRNAE
11	TRNAG
11	TRNAG
11	TRNAS
11	TRNAV
11	TSR1
11	UBTF
11	USP32
11	VAT1
11	VTN
11	WNK4
11	XAF1
11	YWHAE
[truncated: 1,459 more rows]

## Sheet: Table S9
Table S9. The top 5% of candidate genes under selection in sheep by θπ
Chrom	Gene
1	ABCF3
1	ABHD10
1	ACAD11
1	ACKR4
1	ADAMTS5
1	ADAR
1	ADCY10
1	ADGRL2
1	AGAP1
1	AGBL4
1	AK4
1	ALDH9A1
1	ALG3
1	AMOTL2
1	ANAPC13
1	ANGPTL3
1	APP
1	ARHGAP30
1	ARHGEF11
1	ARL13B
1	ARNT
1	ASB17
1	ASH1L
1	ASTE1
1	ATF6
1	ATG16L1
1	ATG4B
1	ATG4C
1	ATP5PO
1	B4GALT3
1	BBX
1	BCAR3
1	BEND5
1	BOK
1	BTBD19
1	BTF3L4
1	C1H1orf226
1	C2CD4D
1	CACHD1
1	CAMK2N2
1	CAPZA1
1	CC2D1B
1	CCDC30
1	CD244
1	CD47
1	CEP63
1	CHRNB2
1	CLCN2
1	CLDN19
1	CLIC6
1	CLSTN2
1	CMPK1
1	COL11A1
1	CPA3
1	CPT2
1	CRTC2
1	CTBS
1	CTSK
1	CTSS
1	CTXND2
1	CZIB
1	D2HGDH
1	DAB1
1	DAP3
1	DCLRE1B
1	DDR2
1	DEDD
1	DENND2C
1	DENND4B
1	DIP2A
1	DIPK1A
1	DNAI4
1	DOCK7
1	DPYD
1	DTYMK
1	DYNLT4
1	DZIP3
1	ECE2
1	EIF2B3
1	EIF4G1
1	ELAVL4
1	EPHA6
1	EPHB1
1	EVI5
1	FAAH
1	FAF1
1	FAM131A
1	FAM3B
1	FAM78B
1	FGGY
1	FLG
1	FNBP1L
1	FOXD2
1	FOXD3
1	FOXE3
1	FOXJ3
1	GAL3ST2
1	GATAD2B
1	GATD3
1	GFI1
1	GIGYF2
1	GK5
1	GON4L
1	GPA33
1	GPR156
1	GPR161
1	GPR171
1	HAO2
1	HAPLN2
1	HDAC4
1	HECTD3
1	HEG1
1	HIPK1
1	HIVEP3
1	IFI44
1	IFI44L
1	IFNAR1
1	IFT80
1	IGF2BP2
1	IMPG2
1	ING5
1	INPP5B
1	INPP5D
1	IQGAP3
1	JTB
1	KANK4
1	KCNJ13
1	KCNN3
1	KLHDC9
1	KNCN
1	KPLCE
1	KTI12
1	LEPR
1	LHX8
1	LMLN
1	LOC101102851
1	LOC101102861
1	LOC101103112
1	LOC101103547
1	LOC101103771
1	LOC101105114
1	LOC101105610
1	LOC101105704
1	LOC101107565
1	LOC101109132
1	LOC101109142
1	LOC101110467
1	LOC101110546
1	LOC101111409
1	LOC101111677
1	LOC101112774
1	LOC101114658
1	LOC101114669
1	LOC101114922
1	LOC101115653
1	LOC101116193
1	LOC101116196
1	LOC101116699
1	LOC101117285
1	LOC101117979
1	LOC101120617
1	LOC101121385
1	LOC101121563
1	LOC101121646
1	LOC101121820
1	LOC101121986
1	LOC101122496
1	LOC105602127
1	LOC105602566
1	LOC105604319
1	LOC105605201
1	LOC105605703
1	LOC105607754
1	LOC105609232
1	LOC105609509
1	LOC105609874
1	LOC105611362
1	LOC105611653
1	LOC105613604
1	LOC105614079
1	LOC106990841
1	LOC106990860
1	LOC114109297
1	LOC114109738
1	LOC114110055
1	LOC114110880
1	LOC114110945
1	LOC114110971
1	LOC114111020
1	LOC114111041
1	LOC114111055
1	LOC114111057
1	LOC114111064
1	LOC114111077
1	LOC114111198
1	LOC114111223
1	LOC114111265
1	LOC114111275
1	LOC114111327
1	LOC114111353
1	LOC114111415
1	LOC114112886
1	LOC114113046
1	LOC114113269
1	LOC114113348
1	LOC114113766
1	LOC114114831
1	LOC114114864
1	LOC114114872
1	LOC114115222
1	LOC114116621
1	LOC114116973
1	LOC114117337
1	LOC114117862
1	LOC114117969
1	LOC114118461
1	LOC121816219
1	LOC121816304
1	LOC121816352
1	LOC121816643
1	LOC121817095
1	LOC121817212
1	LOC121817389
1	LOC121817418
1	LOC121817520
1	LOC121817852
1	LOC121817945
1	LOC121818042
1	LOC121818571
1	LOC121818722
1	LOC121818846
1	LOC121819109
1	LOC121819226
1	LOC121819228
1	LOC121819434
1	LOC121819464
1	LOC121820159
1	LOC121820359
1	LOC121820706
1	LOC121820785
1	LOC132657359
1	LOC132657418
1	LOC132657460
1	LOC132657670
1	LOC132657698
1	LOC132657729
1	LOC132657857
1	LOC132657858
1	LOC132657881
1	LOC132657903
1	LOC132657904
1	LOC132657931
1	LOC132658150
1	LOC132658261
1	LOC132658273
1	LOC132658292
1	LOC132658339
1	LOC132658359
1	LOC132658443
1	LOC132658549
1	LOC132658715
1	LOC132659140
1	LOC132659159
1	LOC132659342
1	LOC132659386
1	LOC132659748
1	LOC132659831
1	LOC132659839
1	LOC132660228
1	LPAR3
1	LRP8
1	LRRC40
1	LRRC41
1	LRRC52
1	LRRC58
1	LRRC7
1	LRRIQ3
1	LURAP1
1	MACF1
1	MAEL
1	MAGOH
1	MAN1A2
1	MAST2
1	MECOM
1	MED12L
1	MGST3
1	MKNK1
1	MOB3C
1	MOV10
1	MRPS6
1	MSL2
1	MSTO1
1	MYLK
1	NAXE
1	NECTIN3
1	NECTIN4
1	NEK11
1	NEU4
1	NIT1
1	NLGN1
1	NOTCH2
1	NRDC
1	NSUN3
1	NSUN4
1	NUF2
1	OLFML2B
1	ORC1
1	OSBPL11
1	OSBPL9
1	P2RY14
1	P3R3URF
1	PCCB
1	PDE4B
1	PFDN2
1	PGLYRP4
1	PHLDB2
1	PIK3R3
1	PLK3
1	PLSCR4
1	PLSCR5
1	POGK
1	POLR2H
1	POMGNT1
1	POU2F1
1	PPIH
1	PPM1L
1	PPOX
1	PPP2R3A
1	PRDM15
1	PSMD2
1	PTCH2
1	PTGFR
1	PWP2
1	RAB3B
1	RAD54L
1	RAVER2
1	RCAN1
1	RIPK4
1	RLF
1	RNF11
1	RNF220
1	ROBO2
1	ROR1
1	RORC
1	RSPH1
1	RYK
1	S100A5
1	S100A6
1	S100A8
1	S100A9
1	SENP2
1	SERPINI1
1	SETDB1
1	SF3A3
1	SFPQ
1	SFT2D2
1	SGIP1
1	SH3GLB1
1	SLC2A1
1	SLC39A1
1	SLC44A5
1	SLC5A3
1	SNX4
1	SPATA1
1	SPATA46
1	SPATA6
1	SRSF11
1	ST6GALNAC5
1	ST7L
1	STIL
1	STK25
1	STX19
1	STYXL2
1	TADA1
1	TAGLN3
1	TBX15
1	TBX19
1	TF
1	TFDP2
1	THAP4
1	THEM4
1	THEM5
1	THPO
1	TIPRL
1	TMCO1
1	TNNI3K
1	TRABD2B
1	TRAPPC10
1	TRNAC-ACA
1	TRNAC-GCA
1	TRNAE-UUC
1	TRNAG-CCC
1	TRNAG-UCC
1	TRNAS-GGA
1	TRNAW-CCA
1	TRNAY-AUA
1	TRNAY-GUA
1	TSPAN1
1	TTC24
1	TXNDC12
1	UBASH3A
1	UBE2U
1	UBXN7
1	UCK2
1	UFC1
1	UROD
1	USP21
1	USP25
1	VWA5B2
1	XRN1
1	YBX1
1	ZBTB38
1	ZFYVE9
1	ZMYM4
1	ZSWIM5
2	ACMSD
2	ACVR1
2	ADAMTSL1
2	AK2
2	AMER3
2	ANKAR
2	ANXA10
2	ARHGEF39
2	ARHGEF4
2	ASDURF
2	ASNSD1
2	ATOSB
2	B3GALT1
2	BICD2
2	BIN1
2	BNC2
2	C2H2orf66
2	C2H2orf88
2	C2H9orf152
2	CA9
2	CAMK2N1
2	CARD19
2	CCDC115
2	CCDC141
2	CCDC171
2	CCDC180
2	CCL19
2	CCL20
2	CCL27
2	CCNT2
2	CD52
2	CENPP
2	CEP78
2	CEP85
2	CER1
2	CFAP210
2	CFLAR
2	CLASP1
2	CNTLN
2	CNTNAP5
2	COL3A1
2	COL5A2
2	CRYBG2
2	CTSB
2	CYFIP1
2	CYTIP
2	DARS1
2	DEFB134
2	DEFB136
2	DHRS9
2	DLX1
2	DLX2
2	DNAH7
2	EN1
2	EPB41L4B
2	EPB41L5
2	EPC2
2	ERBB4
2	FABP3
2	FAM167A
2	FAM168B
2	FANCG
2	FBXO16
2	FBXO42
2	FDFT1
2	FGD3
2	FHIP2B
2	FREM1
2	FRRS1L
2	FSIP2
2	FZD3
2	GALNT3
2	GALT
2	GDA
2	GLDC
2	GLI2
2	GPR55
2	GRHL3
2	GTDC1
2	GTF3C3
2	GULP1
2	HCRTR1
2	HECW2
2	HIBCH
2	HR
2	HRCT1
2	HRURF
2	HS6ST1
2	HYCC2
2	IL11RA
2	IL33
2	IMP4
2	INPP1
2	INSIG2
2	IPPK
2	ITM2C
2	LIMS2
2	LINGO2
2	LOC101104050
2	LOC101108371
2	LOC101110212
2	LOC101110567
2	LOC101111528
2	LOC101120060
2	LOC101121661
2	LOC101121753
2	LOC105607491
2	LOC105607666
2	LOC105607801
2	LOC105607956
2	LOC105608034
2	LOC105608393
2	LOC105608622
2	LOC105608693
2	LOC105608734
2	LOC105608783
2	LOC105608837
2	LOC105609277
2	LOC105611487
2	LOC105611582
2	LOC106990384
2	LOC106990933
2	LOC106990950
2	LOC114112799
2	LOC114112800
2	LOC114112818
2	LOC114112819
2	LOC114112820
2	LOC114112821
2	LOC114112873
2	LOC114112903
2	LOC114112952
2	LOC114113021
2	LOC114113035
2	LOC114113036
2	LOC114113042
2	LOC114113084
2	LOC114113270
2	LOC114113312
2	LOC114113320
2	LOC114113337
2	LOC114113357
2	LOC114113417
2	LOC114113426
2	LOC114113436
2	LOC114113445
2	LOC114113454
2	LOC114113464
2	LOC114117488
2	LOC121818508
2	LOC121818529
2	LOC121818546
2	LOC121818550
2	LOC121818555
2	LOC121818564
2	LOC121818591
2	LOC121818625
2	LOC121818641
2	LOC121818651
2	LOC121818672
2	LOC121818673
2	LOC121818684
2	LOC121818692
2	LOC121818693
2	LOC121818721
2	LOC121818753
2	LOC121818768
2	LOC121818799
2	LOC121818800
2	LOC121818801
2	LOC121818853
2	LOC132659130
2	LOC132659133
2	LOC132659147
2	LOC132659178
2	LOC132659181
2	LOC132659190
2	LOC132659191
2	LOC132659192
2	LOC132659193
2	LOC132659212
2	LOC132659213
2	LOC132659214
2	LOC132659217
2	LOC132659248
2	LOC132659258
2	LOC132659280
2	LOC132659301
2	LOC132659305
2	LOC132659306
2	LOC132659313
2	LOC132659320
2	LOC132659321
2	LOC132659351
2	LOC132659356
2	LOC132659363
2	LRP2
2	LURAP1L
2	MAP3K19
2	MAP3K2
2	METAP1D
2	METTL5
2	MFSD14B
2	MFSD6
2	MGAT5
2	MPDZ
2	MSTN
2	MTMR9
2	MUL1
2	MYO3B
2	MYT1L
2	NAB1
2	NCKAP5
2	NDUFB3
2	NEMP2
2	NIPA1
2	NIPA2
2	NIPAL3
2	NUDT18
2	ORMDL1
2	OSGEPL1
2	OSTF1
2	PADI1
2	PADI3
2	PADI4
2	PALM2AKAP2
2	PCSK5
2	PEBP4
2	PEF1
2	PIGO
2	PLCL1
2	PLEKHB2
2	PMS1
2	PPIG
2	PRKAG3
2	PRUNE2
2	PSAT1
2	PTPN18
2	R3HDM1
2	RFK
2	RIC1
2	RNF19B
2	SAP130
2	SAXO1
2	SDC3
2	SESTD1
2	SFT2D3
2	SH3BGRL3
2	SH3GL2
2	SLC40A1
2	SNTG2
2	SP5
2	SPAAR
2	SPAG16
2	SPATA3
2	SSB
2	STK17B
2	STK39
2	STOML2
2	STPG1
2	SUSD3
2	TANK
2	TEK
2	TFCP2L1
2	THSD7B
2	TINAGL1
2	TLN1
2	TMEFF2
2	TMEM163
2	TPM2
2	TRIP12
2	TRNAC-ACA
2	TRNAC-GCA
2	TRNAE-UUC
2	TRNAG-CCC
2	TRNAG-GCC
2	TRNAH-GUG
2	TRNAQ-CUG
2	TRNAR-UCU
2	TRNAS-GCU
2	TRNAS-GGA
2	TRNAW-CCA
2	TTC21B
2	TTC39B
2	TTN
2	TUBGCP5
2	TXN
2	TXNDC8
2	TYRP1
2	UBAP2
2	UBE2R2
2	UBR3
2	UBXN11
2	UGGT1
2	UNC13B
2	VCP
2	VPS13A
2	WDR33
2	WDR75
2	WNT10A
2	WNT6
2	XKR6
2	ZCCHC17
2	ZDHHC21
2	ZEB2
2	ZFAND5
2	ZNF462
2	ZRANB3
3	ABCD2
3	ACTR2
3	ADSL
3	AGBL5
3	ALX1
3	AMIGO2
3	ANKS1B
3	ANO2
3	ASPRV1
3	ASS1
3	ATP2B1
3	ATP6V1C2
3	BABAM2
3	BAIAP2L2
3	BIRC6
3	BLOC1S1
3	BORCS5
3	C3H2orf42
3	CCDC138
3	CCDC85A
3	CD63
3	CEP83
3	CIAO1
3	CNTN1
3	CPNE8
3	CRADD
3	CRIM1
3	CSNK1E
3	CYTH4
3	DBX2
3	DCTN1
3	DDX1
3	DENND1A
3	DNAJB7
3	DNAJC14
3	DNM1L
3	EDAR
3	EEA1
3	EHBP1
3	EID3
3	ELFN2
3	EMILIN1
3	ERLEC1
3	EXOC6B
3	FAM228A
3	FAM228B
3	FBXO11
3	FGD6
3	FKBP1B
3	FNDC4
3	GDF11
3	GEN1
3	GLI1
3	GLS2
3	GLT8D2
3	GLYCAM1
3	GPR75
3	GTSF1
3	HCFC2
3	HEBP1
3	HMGA2
3	IFT172
3	IGF1
3	IMMT
3	INHBC
3	INHBE
3	ITPR2
3	ITPRIPL1
3	ITSN2
3	KHK
3	KIDINS220
3	KRT1
3	KRT2
3	KRT2.11
3	KRT6A
3	KRT71
3	KRT74
3	KRTCAP3
3	LARGE1
3	LGR5
3	LHX2
3	LIMS1
3	LIN7A
3	LOC100526780
3	LOC100526784
3	LOC101102714
3	LOC101102969
3	LOC101104728
3	LOC101108561
3	LOC101109951
3	LOC101110219
3	LOC101110922
3	LOC101111178
3	LOC101111875
3	LOC101112471
3	LOC101113221
3	LOC101116222
3	LOC101116472
3	LOC101116721
3	LOC101116816
3	LOC101117745
3	LOC101118518
3	LOC101119976
3	LOC101122263
3	LOC105606943
3	LOC105611134
3	LOC106990118
3	LOC106991077
3	LOC106991094
3	LOC114113599
3	LOC114113646
3	LOC114113784
3	LOC114113902
3	LOC114113930
3	LOC114113944
3	LOC114113961
3	LOC114113979
3	LOC114114036
3	LOC114114079
3	LOC114114136
3	LOC114114145
3	LOC114114147
3	LOC114114149
3	LOC114114196
3	LOC114114217
3	LOC121818993
3	LOC121819038
3	LOC121819049
3	LOC121819068
3	LOC121819087
3	LOC121819088
3	LOC121819095
3	LOC121819130
3	LOC121819133
3	LOC121819232
3	LOC121819255
3	LOC121819267
3	LOC121819268
3	LOC132659419
3	LOC132659424
3	LOC132659429
3	LOC132659495
3	LOC132659501
3	LOC132659502
3	LOC132659515
3	LOC132659516
3	LOC132659519
3	LOC132659577
3	LOC132659598
3	LOC132659610
3	LOC132659616
3	LOC132659623
3	LOC132659626
3	LOC654331
3	LRP1
3	LRRIQ1
3	MAFF
3	MANSC1
3	MAP4K4
3	MAPRE3
3	MBOAT2
3	MEMO1
3	MFSD2B
3	MICAL3
3	MIP
3	MRPL35
3	MRPL42
3	MRTFA
3	MSGN1
3	MSH6
3	MSRB3
3	NAV3
3	NBAS
3	NCAPH
3	NCKAP1L
3	NCOA1
3	NDUFA4L2
3	NFYB
3	NLRC4
3	NMS
3	NOL10
3	NPAS2
3	NRBP1
3	NRXN1
3	NXPH4
3	ORMDL2
3	OST4
3	PAWR
3	PBX3
3	PCED1B
3	PDCL3
3	PDE1B
3	PDIA6
3	PFN4
3	PICK1
3	PIK3C2G
3	PLA2G6
3	POLR1A
3	PPM1H
3	PPP1R12A
3	PPP1R1A
3	PREB
3	PSME4
3	PTCD3
3	PTPRR
3	R3HDM2
3	RAB21
3	RASSF9
3	RBMS2
3	RDH5
3	REDIC1
3	REEP1
3	RIC8B
3	RIMKLB
3	RNF149
3	RXRA
3	SARNP
3	SF3B6
3	SGSM3
3	SH3RF3
3	SHMT2
3	SLC16A8
3	SLC41A2
3	SMC6
3	SNRNP200
3	SOCS2
3	SOX5
3	SPRYD4
3	SPTBN1
3	SRBD1
3	SRD5A2
3	ST13
3	STAC3
3	STRBP
3	SYT1
3	TAFA2
3	TBC1D13
3	TBC1D15
3	TDG
3	THAP2
3	TIA1
3	TIMELESS
3	TMEM127
3	TMEM131
3	TMEM184B
3	TMEM19
3	TMEM214
3	TMT1A
3	TMTC2
3	TNRC6B
3	TP53I3
3	TPH2
3	TRHDE
3	TRNAA-AGC
3	TRNAA-UGC
3	TRNAC-ACA
3	TRNAC-GCA
3	TRNAE-CUC
3	TRNAG-CCC
3	TRNAG-GCC
3	TRNAG-UCC
3	TRNAH-GUG
3	TRNAR-CCU
3	TRNAR-GCG
3	TRNAS-GGA
3	TRNAW-CCA
3	TRNAY-GUA
3	TSPAN9
3	TXNRD1
3	UBXN2A
3	VEZT
3	VWA3B
3	VWF
3	WDCP
3	WDPCP
3	XPNPEP3
3	YARS2
3	YEATS4
3	ZDHHC17
3	ZER1
4	AGMO
4	AHCYL2
4	AKAP9
4	ARL4A
4	BBS9
4	BZW2
4	CADPS2
4	CDK13
4	CHN2
4	CLCN1
4	CLDN12
4	CPED1
4	CPVL
4	CREB5
4	CRPPA
4	DGKI
4	FAM131B
4	FERD3L
4	GLI3
4	GSDME
4	HDAC9
4	INSIG1
4	JAZF1
4	KCND2
4	LAMB4
4	LEP
4	LHFPL3
4	LOC101105325
4	LOC101111274
4	LOC101111538
4	LOC101111795
4	LOC101112049
4	LOC101113583
4	LOC101113672
4	LOC101114187
4	LOC101115117
4	LOC101118433
4	LOC101121769
4	LOC101122517
4	LOC105606567
4	LOC114114541
4	LOC114114570
4	LOC114114636
4	LOC114114660
4	LOC114114690
4	LOC121819423
4	LOC121819424
4	LOC132659670
4	LOC132659698
4	LOC132659713
4	LOC132659760
4	LOC132659774
4	MAGI2
4	MPLKIP
4	NPSR1
4	PAX4
4	PDE1C
4	PEG10
4	PRKAG2
4	REPIN1
4	RHEB
4	SEMA3D
4	SGCE
4	SLC37A3
4	SMO
4	SND1
4	SRPK2
4	SUGCT
4	SUN3
4	TAX1BP1
4	TBXAS1
4	TRNAC-GCA
4	TRNAG-CCC
4	TRNAH-GUG
4	TRNAK-CUU
4	TRNAS-GGA
4	TSPAN12
4	TWIST1
4	ZNF746
4	ZNF775
4	ZNF777
4	ZNF804B
4	ZYX
5	ADGRE1
5	ANKRD34B
5	AP3D1
5	APBB3
5	ATG10
5	B3GNT3
5	CAMK2A
5	CAMK4
5	CAMLG
5	CD14
5	CD320
5	CDHR2
5	CDX1
5	CERS4
5	CKMT2
5	CLINT1
5	COL5A3
5	CRTC1
5	DHFR
5	DND1
5	DOCK6
5	ECSCR
5	EDIL3
5	EPS15L1
5	ERAP2
5	FCHO1
5	FSTL4
5	GNA11
5	GPRIN1
5	HARS1
5	HAUS8
5	HSD11B1L
5	IK
5	IL5
5	IRF1
5	IZUMO4
5	JADE2
5	KANK2
5	KLHL26
5	LNPEP
5	LOC101103720
5	LOC101104234
5	LOC101108654
5	LOC101111547
5	LOC101113495
5	LOC101117505
5	LOC101121599
5	LOC101122108
5	LOC101122274
5	LOC105608309
5	LOC105608522
5	LOC105611202
5	LOC105611203
5	LOC105611754
5	LOC105615197
5	LOC105615222
5	LOC105615270
5	LOC105615338
5	LOC105615366
5	LOC114114850
5	LOC114114973
5	LOC114115041
5	LOC114115078
5	LOC114115102
5	LOC114115136
5	LOC121819631
5	LOC121819667
5	LOC121819669
5	LOC132659794
5	LOC132659799
5	LOC132659805
5	LOC132659826
5	LOC132659841
5	LOC132659862
5	LOC132659890
5	LOC132659914
5	MCTP1
5	MICOS13
5	MOB3A
5	MSH3
5	NDUFA2
5	NLRP3
5	NR3C1
5	PDGFRB
5	PLIN3
5	PPP2R2B
5	PROP1
5	RAD50
5	RDH8
5	RNF145
5	RNF44
5	RPL18A
5	SAFB2
5	SAR1B
5	SEC24A
5	SGCD
5	SH3BP5L
5	SLC35A4
5	SLC5A5
5	SLC6A7
5	SMIM33
5	SNCB
5	SPINK14
5	SPINK5
5	STARD4
5	STING1
5	TAF7
5	TICAM1
5	TLE2
5	TLE5
5	TMCO6
5	TMEM161B
5	TMEM232
5	TMEM59L
5	TRNAC-ACA
5	TRNAC-GCA
5	TRNAE-UUC
5	WDR36
5	WDR55
5	ZCCHC9
5	ZMAT2
5	ZNF354A
5	ZNF672
5	ZNF692
6	AIMP1
6	ANAPC4
6	ANK2
6	AREG
6	C6H4orf19
6	C6H4orf54
6	CCSER1
6	CENPC
6	COL25A1
6	CXCL13
6	DAPP1
6	DCK
6	DDIT4L
6	DNAJB14
6	ELOVL6
6	ENPEP
6	EREG
6	FAM193A
6	FAM47E
6	FGFR3
6	FRAS1
6	GABRG1
6	GC
6	GIMD1
6	H2AZ1
6	HELQ
6	HPGDS
6	KCNIP4
6	LAMTOR3
6	LEF1
6	LETM1
6	LOC101121518
6	LOC101122788
6	LOC105612761
6	LOC114115331
6	LOC114115333
6	LOC114115363
6	LOC114115452
6	LOC114115458
6	LOC114115479
6	LOC114115480
6	LOC114115500
6	LOC121819793
6	LOC121819832
6	LOC132659919
6	LOC132659923
6	LOC132659927
6	LOC132659928
6	LOC132659937
6	LOC132659961
6	MCUB
6	METTL14
6	MRPL1
6	MTHFD2L
6	MTTP
6	NELFA
6	NPFFR2
6	NSD2
6	OCIAD1
6	OCIAD2
6	RAB28
6	RASGEF1B
6	RBM47
6	RBPJ
6	SEC24D
6	SHROOM3
6	SLBP
6	SMARCAD1
6	TACC3
6	TMEM129
6	TRNAC-ACA
6	WDFY3
6	YTHDC1
7	ADCY4
7	AFG2B
7	ANGEL1
7	ANKRD31
7	ANKRD63
7	ATL1
7	ATP8B4
7	BMF
7	BMP4
7	BUB1B
7	C7H15orf48
7	C7H15orf62
7	CCDC9B
7	CCPG1
7	CDIN1
7	CEP152
7	CGNL1
7	CHP1
7	CIDEB
7	DCAF5
7	DDHD1
7	DHRS1
7	DISP2
7	DNAAF4
7	DNAJC17
7	DUOX1
7	EIF2AK4
7	ESRRB
7	FMN1
7	FNTB
7	FSIP1
7	GATM
7	GCHFR
7	GLCE
7	GMPR2
7	GPR176
7	GREM1
7	HIF1A
7	HOMEZ
7	HRH2
7	INAFM2
7	IRF2BPL
7	ISM2
7	ITGA11
7	KNL1
7	KNSTRN
7	L3HYPDH
7	LOC101106852
7	LOC101107102
7	LOC101119311
7	LOC101119825
7	LOC101120085
7	LOC101120923
7	LOC101121938
7	LOC105606524
7	LOC105606525
7	LOC105608910
7	LOC105610613
7	LOC105613337
7	LOC105613338
7	LOC105615606
7	LOC114115604
7	LOC114115709
7	LOC114115710
7	LOC114115711
7	LOC114115835
7	LOC114115836
7	LOC114115867
7	LOC114115902
7	LOC114115905
7	LOC114115908
7	LOC114115910
7	LOC114115923
7	LOC114115924
7	LOC114115936
7	LOC114115941
7	LOC114115966
7	LOC114115986
7	LOC114115989
7	LOC121819944
7	LOC121819955
7	LOC121819958
7	LOC121819962
7	LOC121819975
7	LOC121819983
7	LOC121819986
7	LOC121820009
7	LOC121820010
7	LOC121820080
7	LOC121820089
7	LOC132660041
7	LOC132660045
7	LOC132660046
7	LOC132660047
7	LOC132660053
7	LOC132660055
7	LOC132660059
7	LOC132660117
7	LOC132660136
7	LOC132660146
7	LOC132660177
7	LRRC74A
7	LTB4R
7	LTB4R2
7	MAP3K9
7	MAPK6
7	MAX
7	MEIS2
7	MGA
7	MINDY2
7	MNAT1
7	MNS1
7	MYZAP
7	NEDD4
7	NEMF
7	NOP9
7	NREP
7	NUSAP1
7	OIP5
7	OTX2
7	PAK6
7	PAQR5
7	PIERCE2
7	PIGB
7	PLCB2
7	POLR2M
7	PPM1A
7	PPP1R14D
7	PPP2R5E
7	PRTG
7	PTGDR
7	PYGO1
7	RABGGTA
7	RAD51
7	RASGRP1
7	RFX7
7	RIPK3
7	RMDN3
7	RNF212B
7	RPUSD2
7	SAV1
7	SHC4
7	SHF
7	SLC28A2
7	SLC7A8
7	SLTM
7	SMAD6
7	SNAPC1
7	SPPL2A
7	SPRED1
7	SPTLC2
7	SRP14
7	TEX9
7	TGM1
7	THOC3
7	TINF2
7	TMEM260
7	TRNAC-ACA
7	TRNAH-GUG
7	TRNAS-GCU
7	UNC13C
7	VASH1
7	WDR89
7	YTHDC2
7	ZFYVE19
7	ZNF280D
8	ADGRG6
8	AKAP12
8	ARFGEF3
8	ARG1
8	ARHGAP18
8	ARID1B
8	ATG5
8	BVES
8	CALHM4
8	EPB41L2
8	ESR1
8	EZR
8	FRMD1
8	HACE1
8	IGF2R
8	LAMA2
8	LIN28B
8	LOC105610729
8	LOC114116072
8	LOC114116101
8	LOC114116192
8	LOC121820169
8	LOC121820176
8	LOC121820185
8	LOC121820207
8	LOC121820209
8	LOC132660185
8	LOC132660221
8	LOC132660223
8	LOC132660237
8	MAP7
8	MDN1
8	MED23
8	MYB
8	NT5DC1
8	PDE7B
8	PERP
8	PLEKHG1
8	POPDC3
8	PREP
8	PRKN
8	QKI
8	RWDD1
8	SIM1
8	SLC35F1
8	SMOC2
8	SNX14
8	STXBP5
8	SYNCRIP
8	SYTL3
8	TAB2
8	TBC1D32
8	TBX18
8	TCF21
8	THBS2
8	THEMIS
8	TMEM244
8	TNFAIP3
8	TRAPPC3L
8	TRNAE-UUC
8	TSPYL1
8	TSPYL4
8	ZC3H12D
9	ANXA13
9	ATAD2
9	ATP6V1C1
9	C9H8orf89
9	CPQ
9	CSMD3
9	CYRIB
9	DERL1
9	DPYS
9	EXT1
9	EYA1
9	FAM91A1
9	FBXO32
9	FER1L6
9	GRHL2
9	KCNQ3
9	KLHL38
9	LOC101109545
9	LOC101121611
9	LOC105611918
9	LOC105616014
9	LOC114116360
9	LOC114116388
9	LOC114116461
9	LOC114116512
9	LOC114116527
9	LOC114116535
9	LOC121816003
9	LOC121820321
9	LOC121820322
9	LOC121820324
9	LOC121820328
9	LOC121820340
9	LOC132657175
9	LOC132657210
9	LOC132657213
9	LOC132657218
9	LOC132657222
9	LRP12
9	LYPLA1
9	MCMDC2
9	MRPL13
9	MRPL15
9	MTBP
9	MTSS1
9	NCALD
9	NDUFB9
9	NIPAL2
9	NKAIN3
9	NSMAF
9	NSMCE2
9	NTAQ1
9	OXR1
9	PEX2
9	RDH10
9	RIMS2
9	RPL7
9	SAMD12
9	SGK3
9	STK3
9	TATDN1
9	TBC1D31
9	TGS1
9	TMEM67
9	TMEM68
9	TOX
9	TRIB1
9	TRNAC-ACA
9	TRNAC-GCA
9	TRNAG-UCC
9	TRNAW-CCA
9	TRPS1
9	UBE2W
9	XKR9
9	ZHX1
9	ZHX2
10	ALG11
10	ATP11A
10	ATP7B
10	BRCA2
10	CCDC122
10	CDK8
10	COL4A1
10	COMMD6
10	CPB2
10	CUL4A
10	DGKH
10	DIAPH3
10	DOCK9
10	EEF1AKMT1
10	F10
10	FLT1
10	FNDC3A
10	FRY
10	GGACT
10	GPALPP1
10	GPC5
10	IFT88
10	IL17D
10	KATNAL1
10	KPNA3
10	LACC1
10	LOC101110773
10	LOC101114879
10	LOC101115632
10	LOC105607399
10	LOC105607413
10	LOC105608010
10	LOC105616164
10	LOC105616225
10	LOC114116748
10	LOC121820476
10	LOC132657256
10	LOC132657263
10	LOC132657276
10	LOC132657277
10	LOC132657287
10	LOC132657308
10	LOC132657309
10	MAB21L1
10	MCF2L
10	METTL21C
10	MTRF1
10	N4BP2L1
10	N4BP2L2
10	NAA16
10	NBEA
10	NEK5
10	NUFIP1
10	PCCA
10	PCID2
10	PDS5B
10	PIBF1
10	PROZ
10	RFC3
10	RFXAP
10	RXFP2
10	SLC10A2
10	SLC7A1
10	SMAD9
10	SPART
10	SPATA13
10	TMTC4
10	TPP2
10	TRNAE-UUC
10	UCHL3
10	XPO4
10	ZAR1L
10	ZC3H13
10	ZIC2
10	ZIC5
11	AATK
11	ABCA5
11	ABI3
11	ACACA
11	ALYREF
11	ANAPC11
11	ARHGAP44
11	ARHGDIA
11	ARRB2
11	ASPSCR1
11	ATP5MC1
11	B4GALNT2
11	BAHCC1
11	BAIAP2
11	BRIP1
11	CA10
11	CALCOCO2
11	CBX2
11	CBX4
11	CBX8
11	CCT6B
11	CDC27
11	CDC6
11	CENPX
11	CEP112
11	CXCL16
11	CYTH1
11	DCXR
11	DNAH2
11	DNAH9
11	EFCAB13
11	EFCAB3
11	ENDOV
11	ERBB2
11	FAM117A
11	FMNL1
11	GALK1
11	GCGR
11	GJD3
11	GLOD4
11	GNGT2
11	GRB7
11	HEXD
11	HOXB13
11	IKZF3
11	INTS2
11	ITGB4
11	JMJD6
11	KANSL1
11	KAT7
11	KCNJ16
11	KCNJ2
11	KDM6B
11	KRT12
11	KRT20
11	KRT23
11	KRT26
11	KRT27
11	KRT28
11	KRT39
11	LASP1
11	LOC101104162
11	LOC101107035
11	LOC101108931
11	LOC101109892
11	LOC101113085
11	LOC101113346
11	LOC101117683
11	LOC101121870
11	LOC105605807
11	LOC105606262
11	LOC105606856
11	LOC105608413
11	LOC105610551
11	LOC105616421
11	LOC114116834
11	LOC114116856
11	LOC114116901
11	LOC114116944
11	LOC114116955
11	LOC114117017
11	LOC114117018
11	LOC114117057
11	LOC114117058
11	LOC114117059
11	LOC114117134
11	LOC121816007
11	LOC121820551
11	LOC121820561
11	LOC121820569
11	LOC121820573
11	LOC121820574
11	LOC121820602
11	LOC121820603
11	LOC121820606
11	LOC121820616
11	LOC121820634
11	LOC121820635
11	LOC121820659
11	LOC121820667
11	LOC121820669
11	LOC121820693
11	LOC121820695
11	LOC121820696
11	LOC132657317
11	LOC132657342
11	LOC132657344
11	LOC132657345
11	LOC132657355
11	LOC132657356
11	LOC132657363
11	LOC132657380
11	LOC443162
11	LRRC45
11	MAFG
11	MAP2K4
11	MAP2K6
11	MAP3K14
11	MARCHF10
11	MCRIP1
11	MED11
11	METTL23
11	MFSD11
11	MIEN1
11	MIR22
11	MXRA7
11	MYADML2
11	MYOCD
11	NARF
11	NGFR
11	NOTUM
11	NPB
11	NPTX1
11	NXPH3
11	OGFOD3
11	P4HB
11	PCTP
11	PCYT2
11	PELP1
11	PHB1
11	PHOSPHO1
11	PPP1R27
11	PRCD
11	PRPF8
11	PYCR1
11	RAC3
11	RARA
11	RBFOX3
11	RFNG
11	RNF213
11	SERPINF2
11	SIRT7
11	SLC35B1
11	SNF8
11	SOX9
11	SPATA32
11	SPOP
11	SRSF2
11	ST6GALNAC2
11	TLCD2
11	TRNAA-AGC
11	TRNAC-GCA
11	TRNAM-CAU
11	TRNAQ-UUG
11	TTLL6
11	UBE2Z
11	UNC13D
11	UNK
11	USP32
11	VPS53
11	WDR81
11	WIPF2
11	ZNF18
11	ZNF652
12	AADACL3
12	CA6
12	CACNA1S
12	CAMSAP2
12	CATSPERE
12	COP1
12	DHRS3
12	DHX9
12	DPT
12	DSTYK
12	EDEM3
12	ENAH
12	EXOSC10
12	F5
12	FBXO28
12	GPR157
12	GPR25
12	H6PD
12	HHAT
12	KCNH1
12	KCNT2
12	KIF21B
12	KLHDC8A
12	LAMC1
12	LAMC2
12	LOC101104844
12	LOC101114456
12	LOC105616528
12	LOC114108606
12	LOC114117284
12	LOC114117339
12	LOC114117369
12	LOC114117383
12	LOC114117384
12	LOC114117407
12	LOC121816071
12	LOC121816072
12	LOC121820756
12	LOC121820767
12	LOC121820771
12	LOC132657491
12	LOC132657493
12	LOC132657508
12	LOC132657511
12	MEGF6
12	MTOR
12	NUAK2
12	PLA2G4A
12	PLD5
12	PRG4
12	PTPN14
12	RBBP5
12	SDCCAG8
12	SELP
12	SHCBP1L
12	SLC26A9
12	SLC2A5
12	SPATA17
12	SPEN
12	SPMIP3
12	SUCO
12	TNFSF4
12	TPR
12	TRNAC-GCA
12	TRNAD-AUC
12	TRNAE-UUC
12	TRNAG-UCC
12	TRNAK-UUU
12	USH2A
12	VPS13D
12	ZBTB17
13	ACOT8
13	AKR1E2
13	ANKEF1
13	ASIP
13	AVP
13	B4GALT5
13	BMI1
13	BPIFA3
13	CACNB2
13	CCDC7
13	CDH26
13	CHD6
13	COL9A3
13	COMMD3
13	CTCFL
13	CTSA
13	DCLRE1C
13	DHTKD1
13	DIDO1
13	EDEM2
13	EIF6
13	ESF1
13	EYA2
13	FAM107B
13	FAM217B
13	FAM83C
13	FASTKD5
13	FLRT3
13	FRMD4A
13	GATA3
13	GID8
13	GNAS
13	HRH3
13	ISM1
13	ITGB1
13	KIAA1217
13	KIF16B
13	KIF5B
13	LOC101102411
13	LOC101103085
13	LOC101110693
13	LOC101111215
13	LOC101114720
13	LOC101115983
13	LOC101116076
13	LOC101116248
13	LOC101116500
13	LOC101118373
13	LOC105603753
13	LOC105606221
13	LOC105608656
13	LOC105613179
13	LOC114117487
13	LOC114117499
13	LOC114117542
13	LOC114117597
13	LOC114117616
13	LOC114117641
13	LOC114117654
13	LOC114117686
13	LOC114117694
13	LOC114117700
13	LOC114117712
13	LOC121815985
13	LOC121816177
13	LOC121816191
13	LOC121816192
13	LOC121816212
13	LOC121816246
13	LOC121816247
13	LOC121816248
13	LOC121816250
13	LOC121816253
13	LOC121816258
13	LOC121816268
13	LOC121816288
13	LOC121816291
13	LOC121816292
13	LOC132657540
13	LOC132657560
13	LOC132657569
13	LOC132657578
13	LOC132657611
13	LOC132657616
13	LOC132657617
13	LOC132657620
13	LOC132657622
13	LOC132657627
13	LOC132657638
13	LOC443027
[truncated: 1,292 more rows]

## Sheet: Table S10
Table S10. Overlapping selection candidate genes in sheep by FST and θπ
Chrom	Start	End	Gene	FST	θπ
1	101775001	101825000	THEM4	0.220189	1.61261
1	103925001	103975000	LOC114111057	0.236938	1.1909
1	103950001	104000000	S100A5	0.198779	0.957553
1	104275001	104325000	LOC121820359	0.197909	0.828357
1	105600001	105650000	ASH1L	0.200789	0.752761
1	105625001	105675000	ASH1L	0.229117	0.735704
1	106525001	106575000	NAXE	0.22593	1.02758
1	112025001	112075000	LOC101121646	0.194951	0.728857
1	112525001	112575000	DEDD	0.207163	0.81655
1	113175001	113225000	ATF6	0.310479	0.680859
1	113325001	113375000	ATF6	0.208256	0.760629
1	113350001	113400000	ATF6	0.226238	0.765392
1	113375001	113425000	ATF6	0.216349	1.18634
1	113400001	113450000	ATF6	0.209319	1.09666
1	113550001	113600000	C1H1orf226	0.198744	0.637337
1	113600001	113650000	C1H1orf226	0.200507	0.748085
1	113650001	113700000	C1H1orf226	0.197489	0.822195
1	113675001	113725000	C1H1orf226	0.212811	0.782674
1	113725001	113775000	C1H1orf226	0.205398	0.736655
1	114975001	115025000	NUF2	0.216903	0.919484
1	117600001	117650000	LOC114111020	0.215422	1.05929
1	117625001	117675000	LOC114111020	0.221454	0.730801
1	117675001	117725000	MGST3	0.228387	0.845377
1	117700001	117750000	ALDH9A1	0.268363	0.894034
1	117725001	117775000	ALDH9A1	0.267301	0.995264
1	117750001	117800000	TMCO1	0.272602	0.889841
1	117775001	117825000	TMCO1	0.296085	0.645597
1	117800001	117850000	TMCO1	0.277029	0.872153
1	117825001	117875000	TMCO1	0.240079	0.993025
1	118200001	118250000	FAM78B	0.196183	1.31477
1	118225001	118275000	FAM78B	0.199877	1.20832
1	118650001	118700000	LOC121820785	0.194893	0.853134
1	118675001	118725000	LOC121820785	0.200061	0.781654
1	119025001	119075000	MAEL	0.346448	0.800319
1	119050001	119100000	MAEL	0.219304	1.01467
1	119075001	119125000	MAEL	0.22397	1.00101
1	119125001	119175000	GPA33	0.298127	1.03237
1	119150001	119200000	GPA33	0.279294	1.04734
1	119175001	119225000	GPA33	0.23107	1.31342
1	119400001	119450000	POU2F1	0.199708	0.812885
1	120600001	120650000	SFT2D2	0.217662	0.948842
1	120625001	120675000	TBX19	0.221732	0.895399
1	120650001	120700000	TBX19	0.227558	0.81666
1	122825001	122875000	IFNAR1	0.331353	1.25768
1	122850001	122900000	IFNAR1	0.309362	1.64889
1	141600001	141650000	LOC121816219	0.217549	0.94357
1	141625001	141675000	LOC121816219	0.238095	0.897287
1	141650001	141700000	LOC121816219	0.197774	0.944873
1	145225001	145275000	ROBO2	0.214182	0.749518
1	145250001	145300000	ROBO2	0.246774	1.33373
1	145275001	145325000	ROBO2	0.200681	0.693459
1	14750001	14800000	RLF	0.203224	0.833378
1	167300001	167350000	LOC121816352	0.206729	0.826962
1	17025001	17075000	CCDC30	0.205429	0.670429
1	172025001	172075000	LOC101114658	0.265751	0.892039
1	172050001	172100000	LOC101114658	0.253585	0.852045
1	172900001	172950000	LOC114118461	0.258926	1.06954
1	17375001	17425000	LOC132657857	0.210662	0.710153
1	174375001	174425000	DZIP3	0.20938	0.641106
1	177675001	177725000	TAGLN3	0.340056	0.7223
1	190250001	190300000	HEG1	0.20673	1.2268
1	190275001	190325000	HEG1	0.212753	1.14798
1	190725001	190775000	SNX4	0.27444	1.14923
1	190750001	190800000	SNX4	0.210212	1.1544
1	190825001	190875000	OSBPL11	0.235753	1.13138
1	190850001	190900000	OSBPL11	0.232028	1.01023
1	190900001	190950000	OSBPL11	0.249199	0.978841
1	190925001	190975000	LMLN	0.261292	0.779364
1	19475001	19525000	EIF2B3	0.213709	0.963427
1	19500001	19550000	EIF2B3	0.356805	1.19553
1	19525001	19575000	EIF2B3	0.390068	1.27873
1	19550001	19600000	EIF2B3	0.267777	1.43524
1	19575001	19625000	EIF2B3	0.323301	1.43556
1	19600001	19650000	EIF2B3	0.354835	1.21193
1	19625001	19675000	ZSWIM5	0.314592	1.32602
1	19650001	19700000	ZSWIM5	0.353385	1.32588
1	19675001	19725000	ZSWIM5	0.217463	0.680899
1	199100001	199150000	LOC132660228	0.21262	0.750175
1	21325001	21375000	LOC101105114	0.195904	0.911175
1	21350001	21400000	LOC101105114	0.20912	1.29656
1	22450001	22500000	TRABD2B	0.22019	0.750353
1	23525001	23575000	AGBL4	0.225203	0.642448
1	242250001	242300000	LOC114110945	0.215633	0.859493
1	24425001	24475000	AGBL4	0.268304	0.819522
1	24450001	24500000	AGBL4	0.299622	0.786071
1	24600001	24650000	ELAVL4	0.216614	0.679127
1	247375001	247425000	TFDP2	0.269835	1.14263
1	247400001	247450000	TFDP2	0.257957	1.38793
1	247425001	247475000	TFDP2	0.208581	1.03753
1	247450001	247500000	TFDP2	0.196791	0.693687
1	248125001	248175000	ZBTB38	0.238701	1.83706
1	249650001	249700000	CLSTN2	0.205501	0.687949
1	249675001	249725000	CLSTN2	0.240762	1.42129
1	255575001	255625000	AMOTL2	0.272425	0.887463
1	255650001	255700000	LOC114112886	0.253534	1.08131
1	255675001	255725000	LOC114112886	0.337117	1.51139
1	255700001	255750000	RYK	0.35318	1.50904
1	255850001	255900000	LOC105602127	0.208624	2.33391
1	259450001	259500000	NEK11	0.20446	0.806435
1	259475001	259525000	NEK11	0.220476	0.844346
1	259500001	259550000	NEK11	0.236158	0.794113
1	266900001	266950000	DIP2A	0.216324	0.651621
1	27750001	27800000	LRP8	0.241943	1.19972
1	27775001	27825000	LRP8	0.224596	1.38356
1	34800001	34850000	LOC101121820	0.200755	0.664744
1	34875001	34925000	LOC101121820	0.248532	0.684091
1	38700001	38750000	FOXD3	0.21853	0.703181
1	39925001	39975000	CACHD1	0.216179	1.08332
1	39950001	40000000	CACHD1	0.1978	0.961414
1	40800001	40850000	AK4	0.196829	0.775933
1	41150001	41200000	LEPR	0.225094	0.8376
1	41350001	41400000	PDE4B	0.244724	1.0707
1	41375001	41425000	PDE4B	0.238638	0.711416
1	5425001	5475000	AGAP1	0.199371	0.778564
1	54750001	54800000	LOC121817520	0.197787	1.07012
1	69900001	69950000	EVI5	0.209734	0.765938
1	74525001	74575000	DPYD	0.256775	1.0362
1	8150001	8200000	GIGYF2	0.210244	0.659892
1	90000001	90050000	CAPZA1	0.205467	0.707455
1	97300001	97350000	NOTCH2	0.200366	1.07033
2	105675001	105725000	DEFB134	0.265269	0.666706
2	105700001	105750000	DEFB134	0.336932	0.724584
2	111025001	111075000	LOC114113035	0.216495	1.12728
2	111050001	111100000	LOC101121661	0.208635	1.04087
2	114200001	114250000	PTPN18	0.200697	1.44074
2	114225001	114275000	PTPN18	0.205027	0.77472
2	114350001	114400000	AMER3	0.227868	0.66048
2	114425001	114475000	ARHGEF4	0.20456	0.642442
2	114900001	114950000	PLEKHB2	0.220945	1.11363
2	114925001	114975000	PLEKHB2	0.234765	1.10534
2	114950001	115000000	PLEKHB2	0.278004	0.962983
2	114975001	115025000	LOC105608693	0.364101	0.723994
2	115000001	115050000	LOC105608693	0.379769	0.638335
2	115100001	115150000	LOC114113320	0.435304	0.645408
2	115125001	115175000	LOC114113320	0.315438	0.984522
2	116725001	116775000	LOC132659305	0.194688	1.96353
2	117125001	117175000	LOC114113042	0.233031	1.05312
2	117150001	117200000	HS6ST1	0.26289	1.18785
2	117175001	117225000	HS6ST1	0.235522	1.49364
2	117200001	117250000	HS6ST1	0.293469	1.0528
2	117225001	117275000	HS6ST1	0.287188	1.25417
2	117250001	117300000	UGGT1	0.246702	1.88345
2	117275001	117325000	UGGT1	0.350231	1.50975
2	117300001	117350000	UGGT1	0.385848	1.48493
2	117325001	117375000	UGGT1	0.333034	1.49931
2	117350001	117400000	UGGT1	0.283806	1.14438
2	117375001	117425000	UGGT1	0.238267	1.22713
2	117400001	117450000	UGGT1	0.227813	1.21078
2	117425001	117475000	SAP130	0.239174	1.09869
2	117450001	117500000	SAP130	0.216333	1.04726
2	117475001	117525000	SAP130	0.215407	0.9725
2	117500001	117550000	SAP130	0.206712	0.996316
2	117775001	117825000	WDR33	0.196473	1.16415
2	118525001	118575000	LOC105608783	0.269563	1.12894
2	118750001	118800000	LOC132659306	0.223772	1.29987
2	118800001	118850000	MFSD6	0.239836	1.47109
2	118825001	118875000	MFSD6	0.353631	1.25654
2	118850001	118900000	MFSD6	0.388501	1.12286
2	118875001	118925000	LOC132659191	0.263947	0.966873
2	119050001	119100000	HIBCH	0.26311	0.956286
2	119075001	119125000	PMS1	0.262336	0.882465
2	119100001	119150000	PMS1	0.29213	0.773412
2	119125001	119175000	PMS1	0.303176	0.795249
2	119150001	119200000	PMS1	0.287474	0.935506
2	119175001	119225000	PMS1	0.253317	1.17203
2	119550001	119600000	PMS1	0.277016	0.818629
2	119575001	119625000	PMS1	0.253513	0.881288
2	119600001	119650000	ANKAR	0.284747	0.955289
2	119625001	119675000	ANKAR	0.246025	1.00219
2	119775001	119825000	SLC40A1	0.308092	0.861057
2	119800001	119850000	SLC40A1	0.262114	1.25234
2	119850001	119900000	LOC105608837	0.251742	0.911157
2	119875001	119925000	LOC105608837	0.238653	0.815809
2	119925001	119975000	LOC132659193	0.21169	1.00357
2	119950001	120000000	LOC132659193	0.200691	0.974191
2	119975001	120025000	LOC132659193	0.30395	0.904836
2	120000001	120050000	LOC132659193	0.326422	0.711856
2	120175001	120225000	COL5A2	0.282739	0.714366
2	120225001	120275000	COL5A2	0.195511	0.68738
2	120775001	120825000	GULP1	0.201442	0.792684
2	120950001	121000000	GULP1	0.2009	1.01496
2	120975001	121025000	GULP1	0.212304	0.81965
2	130975001	131025000	SESTD1	0.20682	0.651287
2	139675001	139725000	UBR3	0.299067	0.695902
2	139700001	139750000	UBR3	0.314378	0.886827
2	139725001	139775000	UBR3	0.226683	1.05906
2	141375001	141425000	STK39	0.212122	0.829557
2	141600001	141650000	B3GALT1	0.197007	0.809963
2	141625001	141675000	B3GALT1	0.231645	1.01089
2	141650001	141700000	B3GALT1	0.253339	1.03188
2	141675001	141725000	B3GALT1	0.23507	1.14317
2	141700001	141750000	B3GALT1	0.216133	1.00523
2	141850001	141900000	B3GALT1	0.197337	1.09249
2	141875001	141925000	B3GALT1	0.19473	1.29493
2	141925001	141975000	B3GALT1	0.239818	1.24475
2	141950001	142000000	B3GALT1	0.214544	0.942267
2	143675001	143725000	TTC21B	0.203562	1.49957
2	146300001	146350000	LOC132659313	0.203093	0.662821
2	165625001	165675000	ZEB2	0.334957	0.68864
2	165650001	165700000	ZEB2	0.240475	1.32096
2	166075001	166125000	GTDC1	0.203529	0.966969
2	166100001	166150000	GTDC1	0.249691	1.20217
2	173675001	173725000	THSD7B	0.205716	0.649231
2	173700001	173750000	THSD7B	0.230723	0.679377
2	173725001	173775000	THSD7B	0.194789	0.799653
2	174850001	174900000	DARS1	0.221465	0.753756
2	174875001	174925000	DARS1	0.219836	0.65838
2	175200001	175250000	R3HDM1	0.196073	0.815249
2	175375001	175425000	ZRANB3	0.24355	0.834906
2	175400001	175450000	ZRANB3	0.198443	0.855166
2	183275001	183325000	INSIG2	0.204171	0.978297
2	184150001	184200000	LOC132659321	0.207939	0.829377
2	186625001	186675000	CLASP1	0.226954	1.32088
2	186650001	186700000	CLASP1	0.290083	1.04474
2	186675001	186725000	CLASP1	0.236491	1.01117
2	220800001	220850000	WNT6	0.205565	1.47899
2	220825001	220875000	WNT10A	0.225304	1.01487
2	234600001	234650000	AK2	0.206988	0.74281
2	234625001	234675000	LOC121818768	0.197838	0.731681
2	234650001	234700000	RNF19B	0.214107	0.825456
2	236400001	236450000	SDC3	0.287071	0.856136
2	28425001	28475000	SUSD3	0.336039	0.912415
2	28450001	28500000	FGD3	0.32735	1.06385
2	28475001	28525000	FGD3	0.28536	1.21493
2	28500001	28550000	FGD3	0.239329	0.851354
2	36875001	36925000	IL11RA	0.21905	0.733052
2	52575001	52625000	HRCT1	0.195681	0.750122
2	53350001	53400000	UNC13B	0.235666	0.674607
2	55075001	55125000	LOC121818625	0.198553	0.860235
2	61625001	61675000	OSTF1	0.208998	1.06952
2	61650001	61700000	OSTF1	0.206402	0.996608
2	650001	700000	SNTG2	0.206627	0.637569
2	70200001	70250000	LOC105607956	0.286861	0.888849
2	70225001	70275000	LOC105607956	0.267558	0.843905
2	74275001	74325000	IL33	0.238154	0.666645
2	74300001	74350000	IL33	0.275335	0.690972
2	74325001	74375000	IL33	0.249115	0.896193
2	74550001	74600000	GLDC	0.247186	0.805309
2	74575001	74625000	GLDC	0.221008	0.656057
2	83050001	83100000	TRNAH-GUG	0.195564	0.649591
2	83350001	83400000	FREM1	0.204192	0.874151
2	84150001	84200000	CCDC171	0.30473	0.716276
2	85125001	85175000	BNC2	0.19616	0.642833
2	85300001	85350000	BNC2	0.216355	0.924529
2	85325001	85375000	BNC2	0.229739	1.06854
2	86550001	86600000	ADAMTSL1	0.200943	1.21382
2	86575001	86625000	ADAMTSL1	0.217063	1.01701
2	86675001	86725000	ADAMTSL1	0.215122	0.907907
2	86700001	86750000	ADAMTSL1	0.207122	0.980894
2	97425001	97475000	LINGO2	0.227881	2.1117
2	97450001	97500000	LINGO2	0.253492	0.792035
2	98225001	98275000	LINGO2	0.210238	0.787803
3	100225001	100275000	RNF149	0.207696	0.685728
3	100650001	100700000	NPAS2	0.204929	0.928857
3	10300001	10350000	PBX3	0.262079	0.942697
3	105825001	105875000	LOC114113961	0.217332	0.981542
3	105850001	105900000	LOC114113961	0.199271	0.693568
3	107875001	107925000	RAB21	0.220279	1.06892
3	107900001	107950000	TBC1D15	0.225082	1.27914
3	107925001	107975000	TBC1D15	0.268667	1.66016
3	107950001	108000000	TBC1D15	0.224278	1.33043
3	115600001	115650000	PAWR	0.198108	0.760758
3	115875001	115925000	PPP1R12A	0.198582	1.67717
3	115900001	115950000	PPP1R12A	0.218275	1.12345
3	115925001	115975000	PPP1R12A	0.204422	0.697802
3	115975001	116025000	PPP1R12A	0.243162	0.661641
3	121425001	121475000	LRRIQ1	0.219624	0.669574
3	12450001	12500000	STRBP	0.226041	0.637342
3	127950001	128000000	LOC101113221	0.280442	1.69297
3	127975001	128025000	LOC101113221	0.21363	1.85602
3	129825001	129875000	SOCS2	0.264708	1.10131
3	129850001	129900000	SOCS2	0.219485	0.763995
3	130625001	130675000	CEP83	0.255054	0.697124
3	130650001	130700000	CEP83	0.231676	0.84167
3	147750001	147800000	REDIC1	0.270402	0.788548
3	147775001	147825000	REDIC1	0.253331	0.736405
3	147800001	147850000	ABCD2	0.205748	0.702009
3	147825001	147875000	ABCD2	0.236603	0.701655
3	147850001	147900000	ABCD2	0.226633	0.825915
3	147875001	147925000	ABCD2	0.239811	0.727073
3	148875001	148925000	PTPRR	0.204071	0.855707
3	150400001	150450000	LOC101102969	0.215639	0.931906
3	150425001	150475000	LOC106991077	0.205982	1.04386
3	154000001	154050000	HMGA2	0.203343	0.876308
3	162300001	162350000	R3HDM2	0.202893	1.22815
3	162325001	162375000	R3HDM2	0.217188	0.893987
3	162350001	162400000	NXPH4	0.217093	1.07872
3	162375001	162425000	NXPH4	0.291065	1.13892
3	163125001	163175000	TIMELESS	0.221381	0.679151
3	173250001	173300000	GLT8D2	0.216011	1.00327
3	210125001	210175000	VWF	0.264118	0.800311
3	210150001	210200000	ANO2	0.219406	0.798149
3	212475001	212525000	TSPAN9	0.211493	0.945866
3	215125001	215175000	MICAL3	0.215366	0.691945
3	215800001	215850000	TMEM184B	0.308429	1.96825
3	215825001	215875000	CSNK1E	0.196303	0.643806
3	25875001	25925000	GEN1	0.210523	1.0729
3	25900001	25950000	GEN1	0.2792	0.938758
3	31675001	31725000	WDCP	0.27346	0.869441
3	31700001	31750000	WDCP	0.328439	1.17966
3	31725001	31775000	FAM228B	0.239856	1.16901
3	31875001	31925000	ITSN2	0.237137	0.734195
3	31900001	31950000	ITSN2	0.215119	0.781826
3	34100001	34150000	MAPRE3	0.210802	0.926922
3	34125001	34175000	LOC114113902	0.266647	1.07656
3	34150001	34200000	PREB	0.254131	0.675787
3	38375001	38425000	ASPRV1	0.199283	0.666797
3	44750001	44800000	WDPCP	0.208773	0.666492
3	63625001	63675000	LOC121819049	0.289306	0.699724
3	63650001	63700000	LOC121819049	0.256822	0.741706
3	70150001	70200000	PSME4	0.204961	0.798214
4	113575001	113625000	ZNF777	0.212139	0.778732
4	24850001	24900000	AGMO	0.209958	0.70001
4	24875001	24925000	AGMO	0.221114	0.879149
4	26150001	26200000	BZW2	0.207838	0.737601
4	28375001	28425000	HDAC9	0.25363	0.752393
4	28400001	28450000	HDAC9	0.195393	0.767756
4	28525001	28575000	HDAC9	0.223918	0.761886
4	28550001	28600000	HDAC9	0.251623	0.905883
4	28575001	28625000	HDAC9	0.256631	1.10532
4	68500001	68550000	CHN2	0.219172	1.0227
4	68525001	68575000	CPVL	0.250933	0.847129
4	69925001	69975000	TAX1BP1	0.207141	0.748879
4	72700001	72750000	GSDME	0.21984	0.797296
4	8500001	8550000	SUN3	0.211581	0.645479
4	8525001	8575000	SUN3	0.195618	0.655661
4	86850001	86900000	KCND2	0.206645	1.2028
4	86875001	86925000	KCND2	0.222078	0.876327
4	94075001	94125000	LOC114114541	0.22069	0.749205
4	94825001	94875000	AHCYL2	0.224178	0.882709
4	94850001	94900000	AHCYL2	0.26528	0.743422
5	19675001	19725000	RAD50	0.238885	1.11805
5	19700001	19750000	RAD50	0.215575	1.20649
5	19725001	19775000	RAD50	0.195722	0.735782
5	48375001	48425000	STING1	0.226682	0.783057
5	5025001	5075000	LOC105615197	0.21961	1.07659
5	5125001	5175000	FCHO1	0.202132	0.826769
5	57150001	57200000	SPINK5	0.298431	0.649385
5	66975001	67025000	CLINT1	0.228309	0.754984
5	68550001	68600000	LOC121819669	0.196699	0.698112
5	68575001	68625000	LOC121819669	0.212986	1.0968
5	68600001	68650000	LOC121819669	0.25619	0.890007
5	68625001	68675000	LOC121819669	0.229672	0.744543
6	109300001	109350000	RAB28	0.212848	0.916023
6	109325001	109375000	RAB28	0.218229	0.951024
6	116800001	116850000	FAM193A	0.206035	0.917633
6	16425001	16475000	COL25A1	0.258713	0.722798
6	19200001	19250000	AIMP1	0.213979	0.960572
6	30925001	30975000	SMARCAD1	0.205393	0.648564
6	60100001	60150000	RBM47	0.261159	0.657956
6	90050001	90100000	EREG	0.202571	0.975725
6	93575001	93625000	FRAS1	0.198488	0.772632
6	93600001	93650000	FRAS1	0.284621	0.840246
6	93625001	93675000	FRAS1	0.290111	0.85695
6	93650001	93700000	FRAS1	0.208471	0.785439
7	21450001	21500000	SLC7A8	0.221508	0.773192
7	2350001	2400000	YTHDC2	0.223788	0.647477
7	2375001	2425000	YTHDC2	0.209486	0.790903
7	27950001	28000000	FMN1	0.236761	0.993696
7	29350001	29400000	LOC105610613	0.262787	0.716396
7	29375001	29425000	LOC105610613	0.200008	0.823468
7	32125001	32175000	SPRED1	0.234725	1.04787
7	32150001	32200000	SPRED1	0.25839	1.0559
7	33725001	33775000	GPR176	0.243083	0.656791
7	33750001	33800000	GPR176	0.238604	1.00896
7	33825001	33875000	EIF2AK4	0.19649	0.744294
7	33850001	33900000	EIF2AK4	0.206438	0.651537
7	34500001	34550000	RAD51	0.212827	0.753095
7	34525001	34575000	PPP1R14D	0.197383	0.672106
7	34975001	35025000	OIP5	0.274683	0.730588
7	35225001	35275000	MGA	0.305153	0.806288
7	35250001	35300000	MGA	0.327534	1.1393
7	35275001	35325000	MGA	0.316219	0.858961
7	35300001	35350000	MGA	0.294604	0.680209
7	41025001	41075000	NEMF	0.205714	0.654946
7	41050001	41100000	NEMF	0.237555	0.865169
7	43375001	43425000	PTGDR	0.202658	1.00378
7	49475001	49525000	SLTM	0.273696	0.949204
7	51725001	51775000	ZNF280D	0.250903	0.959227
7	51875001	51925000	LOC132660041	0.196667	0.857733
7	52300001	52350000	TEX9	0.26644	0.736641
7	52325001	52375000	RFX7	0.22637	0.741138
7	52475001	52525000	RFX7	0.208336	1.15348
7	52750001	52800000	PRTG	0.299151	0.712785
7	52925001	52975000	PYGO1	0.244452	1.11922
7	52950001	53000000	PYGO1	0.246793	0.797428
7	56500001	56550000	MAPK6	0.234096	0.722558
7	58525001	58575000	ATP8B4	0.228239	0.723386
7	59525001	59575000	CEP152	0.224798	0.721341
7	63225001	63275000	LOC121820080	0.20933	0.664073
7	63350001	63400000	DUOX1	0.213767	0.702647
7	69725001	69775000	L3HYPDH	0.208528	0.716278
7	71050001	71100000	MNAT1	0.215173	0.968622
7	71075001	71125000	MNAT1	0.216008	1.0871
7	71900001	71950000	HIF1A	0.213138	0.778818
7	71925001	71975000	SNAPC1	0.201422	0.694624
7	85850001	85900000	ESRRB	0.224324	0.651194
7	86825001	86875000	SPTLC2	0.210897	0.802958
8	32175001	32225000	LOC114116072	0.232263	0.753938
8	32200001	32250000	LIN28B	0.200087	0.742127
8	32275001	32325000	LIN28B	0.23811	0.720594
8	32300001	32350000	LIN28B	0.242756	0.648947
8	32325001	32375000	LIN28B	0.205699	0.703083
8	47825001	47875000	MDN1	0.226651	1.40323
8	53275001	53325000	THEMIS	0.201643	0.66079
8	53300001	53350000	THEMIS	0.246048	1.15529
8	66950001	67000000	ADGRG6	0.350812	0.803812
8	66975001	67025000	ADGRG6	0.35629	0.854982
8	67000001	67050000	ADGRG6	0.333625	0.689677
8	76075001	76125000	AKAP12	0.197038	0.946315
8	80475001	80525000	LOC121820207	0.256596	0.99163
8	80500001	80550000	LOC121820207	0.211366	0.66377
8	81475001	81525000	ARID1B	0.237039	1.17468
8	81500001	81550000	ARID1B	0.196727	1.025
8	82900001	82950000	EZR	0.216576	0.943826
9	28425001	28475000	MTSS1	0.197465	0.794632
9	28450001	28500000	MTSS1	0.217494	0.837821
9	28900001	28950000	FER1L6	0.195253	1.03068
9	28925001	28975000	FER1L6	0.211747	0.865776
9	29025001	29075000	FER1L6	0.197535	0.93648
9	29150001	29200000	ANXA13	0.206423	0.657037
9	29250001	29300000	LOC121816003	0.194698	0.744399
9	29275001	29325000	LOC121816003	0.210375	0.76343
9	29300001	29350000	LOC121816003	0.224461	0.903925
9	29725001	29775000	DERL1	0.218505	0.75507
9	29750001	29800000	DERL1	0.242585	0.804953
9	52725001	52775000	LOC121820340	0.257172	0.789507
9	52750001	52800000	LOC121820340	0.245028	0.81799
9	53175001	53225000	PEX2	0.21216	0.701306
9	60075001	60125000	LOC132657222	0.200978	0.694123
9	61850001	61900000	TRPS1	0.246231	0.640785
9	61875001	61925000	TRPS1	0.237651	1.01702
9	63625001	63675000	TRNAC-GCA	0.270556	0.688148
9	63825001	63875000	CSMD3	0.39073	0.660749
9	63875001	63925000	CSMD3	0.299331	0.653442
9	63925001	63975000	CSMD3	0.273343	0.741213
9	63975001	64025000	CSMD3	0.195308	1.13578
9	64000001	64050000	CSMD3	0.219891	1.30479
9	64050001	64100000	CSMD3	0.20373	0.910944
9	64075001	64125000	CSMD3	0.205529	0.661217
9	64125001	64175000	CSMD3	0.220492	0.876181
9	64150001	64200000	CSMD3	0.238614	0.968801
9	64175001	64225000	CSMD3	0.227208	0.824577
9	64325001	64375000	CSMD3	0.250531	1.03286
9	64350001	64400000	CSMD3	0.264913	1.12835
9	64375001	64425000	CSMD3	0.356397	0.765672
9	64400001	64450000	CSMD3	0.363777	0.749432
9	64425001	64475000	CSMD3	0.32048	1.04909
9	64450001	64500000	CSMD3	0.34237	1.08682
9	64475001	64525000	CSMD3	0.255495	0.78956
9	64500001	64550000	CSMD3	0.223599	0.959012
9	64525001	64575000	CSMD3	0.264445	1.28898
9	64550001	64600000	CSMD3	0.275002	1.34394
9	64575001	64625000	CSMD3	0.251614	1.32678
9	64600001	64650000	CSMD3	0.273596	1.19838
9	64625001	64675000	CSMD3	0.290641	0.94
9	64700001	64750000	CSMD3	0.198185	1.30812
9	64725001	64775000	CSMD3	0.211114	0.791725
9	64950001	65000000	CSMD3	0.302703	0.783554
9	64975001	65025000	CSMD3	0.272913	0.935862
9	65000001	65050000	CSMD3	0.267832	1.11205
9	65025001	65075000	CSMD3	0.237651	1.32468
9	67500001	67550000	LOC101121611	0.198366	0.659125
9	73125001	73175000	DPYS	0.212566	0.71385
9	78475001	78525000	STK3	0.195463	1.27898
10	15525001	15575000	GPALPP1	0.216587	0.663128
10	18875001	18925000	LOC105608010	0.209189	0.785461
10	26150001	26200000	NBEA	0.269545	0.859735
10	26175001	26225000	NBEA	0.257987	1.31741
10	26200001	26250000	NBEA	0.207583	1.42976
10	26250001	26300000	NBEA	0.196142	1.53313
10	26275001	26325000	NBEA	0.231881	1.26356
10	27650001	27700000	RFC3	0.195574	1.43062
10	28700001	28750000	PDS5B	0.194771	0.795402
10	28750001	28800000	PDS5B	0.194692	0.643366
10	28775001	28825000	N4BP2L2	0.215255	0.801674
10	28900001	28950000	BRCA2	0.25612	0.756232
10	28925001	28975000	BRCA2	0.254289	0.725919
10	29050001	29100000	FRY	0.21355	0.696127
10	30750001	30800000	KATNAL1	0.239388	0.698181
10	36000001	36050000	EEF1AKMT1	0.323915	0.637684
10	36025001	36075000	EEF1AKMT1	0.362525	0.967321
10	36050001	36100000	EEF1AKMT1	0.357768	0.918675
10	36075001	36125000	IFT88	0.347773	0.773469
10	36100001	36150000	IFT88	0.352864	0.807344
10	76525001	76575000	GGACT	0.248821	0.720073
10	76550001	76600000	GGACT	0.281091	0.669028
11	30150001	30200000	DNAH9	0.21105	1.07011
11	30175001	30225000	DNAH9	0.277267	0.984039
11	30200001	30250000	DNAH9	0.309706	0.991994
11	30225001	30275000	DNAH9	0.316833	1.1222
11	30250001	30300000	DNAH9	0.311302	1.10089
11	30275001	30325000	DNAH9	0.273398	0.979122
11	30300001	30350000	DNAH9	0.247366	0.94959
11	30325001	30375000	DNAH9	0.235338	0.789969
11	30350001	30400000	DNAH9	0.248713	0.823471
11	30375001	30425000	DNAH9	0.274739	0.961844
11	30400001	30450000	DNAH9	0.290608	0.751005
11	36575001	36625000	KAT7	0.219097	0.811886
11	36750001	36800000	SPOP	0.198748	0.718031
11	36925001	36975000	LOC105608413	0.208812	0.802229
11	39850001	39900000	IKZF3	0.206517	0.711359
11	500001	550000	CA10	0.228954	0.698538
11	51550001	51600000	ENDOV	0.238442	1.05793
11	51575001	51625000	RNF213	0.198009	1.14234
12	2725001	2775000	RBBP5	0.203324	0.722494
12	2775001	2825000	DSTYK	0.219772	1.26189
12	2925001	2975000	LOC132657491	0.221644	0.946424
12	31925001	31975000	CATSPERE	0.206485	0.734967
12	31950001	32000000	CATSPERE	0.222732	0.785521
12	39275001	39325000	SUCO	0.200022	1.07635
12	40075001	40125000	TNFSF4	0.214677	0.958199
12	4875001	4925000	LOC101114456	0.206751	1.04382
12	56425001	56475000	LOC114117369	0.194802	0.65393
12	63600001	63650000	LAMC1	0.245707	1.222
12	63625001	63675000	LAMC2	0.255594	1.66681
12	63650001	63700000	LAMC2	0.212111	0.927043
12	65175001	65225000	EDEM3	0.248321	0.843701
12	65200001	65250000	EDEM3	0.246587	0.716593
12	68575001	68625000	PTPN14	0.21513	0.671337
13	12300001	12350000	TAF3	0.402112	0.701539
13	12325001	12375000	TAF3	0.316348	0.653556
13	12350001	12400000	GATA3	0.220114	0.698888
13	12375001	12425000	GATA3	0.197356	1.11619
13	12400001	12450000	GATA3	0.223487	0.707676
13	17000001	17050000	LOC101118373	0.203661	0.763139
13	17025001	17075000	LOC101118373	0.230662	0.922256
13	21050001	21100000	PLXDC2	0.195885	0.723484
13	28875001	28925000	DCLRE1C	0.229605	0.928931
13	28900001	28950000	MEIG1	0.195255	0.752274
13	32675001	32725000	KIF5B	0.205531	0.912005
13	32700001	32750000	KIF5B	0.206015	1.06645
13	34725001	34775000	LOC114117499	0.204734	0.82637
13	34750001	34800000	LOC114117499	0.196748	0.87378
13	350001	400000	LOC101103085	0.207916	0.832369
13	36200001	36250000	MKX	0.196353	0.760496
13	400001	450000	LOC121816288	0.197009	1.07345
13	56250001	56300000	CDH26	0.284381	1.36401
13	56275001	56325000	SYCP2	0.278832	1.26575
13	56300001	56350000	SYCP2	0.28452	0.693738
13	56325001	56375000	SYCP2	0.302094	0.834731
13	56350001	56400000	PHACTR3	0.36633	1.20393
13	56375001	56425000	PHACTR3	0.304047	0.823275
13	56900001	56950000	ZNF831	0.218931	1.07224
13	57125001	57175000	LOC121816191	0.250395	0.670164
13	6175001	6225000	LOC121816292	0.207167	0.797073
13	6200001	6250000	LOC121816292	0.232069	0.858776
13	63350001	63400000	RALY	0.290709	0.653432
13	63550001	63600000	ASIP	0.310083	0.637952
13	6400001	6450000	SPTLC3	0.225338	0.787667
13	64375001	64425000	EDEM2	0.211767	1.62966
13	64400001	64450000	PROCR	0.239443	1.5826
13	64425001	64475000	PROCR	0.262619	0.992104
13	6650001	6700000	ISM1	0.252006	0.645312
13	74650001	74700000	ZNF335	0.204215	0.68472
13	75625001	75675000	EYA2	0.196311	0.673241
13	7725001	7775000	MACROD2	0.228368	0.676272
13	79775001	79825000	LOC121816250	0.196216	1.44293
13	8425001	8475000	MACROD2	0.211329	1.11493
14	13425001	13475000	CTU2	0.219355	0.825151
14	13450001	13500000	PIEZO1	0.220971	0.744733
14	14575001	14625000	MYLK3	0.203075	0.70889
14	14600001	14650000	MYLK3	0.205497	0.641478
14	43575001	43625000	CHST8	0.215678	0.661626
14	43600001	43650000	CHST8	0.205902	0.653771
14	43800001	43850000	LOC105607560	0.233119	0.803194
14	43875001	43925000	LOC105607560	0.223435	0.668818
14	44350001	44400000	WTIP	0.196423	1.02358
14	44375001	44425000	WTIP	0.240504	1.50619
14	44400001	44450000	WTIP	0.303663	0.844274
14	44525001	44575000	LOC101113168	0.204453	0.756305
14	45450001	45500000	DMKN	0.194651	1.15911
14	45525001	45575000	PMIS2	0.222893	1.81869
14	45550001	45600000	PMIS2	0.22311	1.51955
14	45600001	45650000	HAUS5	0.200644	1.19547
14	45625001	45675000	RBM42	0.199656	1.09101
14	48225001	48275000	PAK4	0.365192	0.824268
14	48250001	48300000	PAK4	0.234803	0.965223
14	48475001	48525000	SUPT5H	0.211759	0.756748
14	62975001	63025000	PTPRH	0.19714	0.929123
14	63000001	63050000	DNAAF3	0.216011	0.95435
14	63025001	63075000	DNAAF3	0.213527	0.750361
14	9025001	9075000	CDH13	0.253563	0.975312
14	9050001	9100000	CDH13	0.288821	1.02932
14	9625001	9675000	CDH13	0.246845	0.877602
15	40400001	40450000	DKK3	0.202736	0.732663
15	49225001	49275000	LOC101112671	0.255613	0.691849
15	51250001	51300000	FCHSD2	0.274169	1.2269
15	51275001	51325000	FCHSD2	0.291323	0.865061
15	52175001	52225000	C2CD3	0.221642	0.645075
15	52325001	52375000	PPME1	0.212445	0.778563
15	52350001	52400000	P4HA3	0.22751	0.960708
15	52375001	52425000	PGM2L1	0.214298	0.894057
15	52775001	52825000	RNF169	0.197255	0.704402
15	62000001	62050000	LOC114118448	0.201203	0.977869
15	62025001	62075000	LOC114118448	0.266589	0.967489
15	62075001	62125000	EIF3M	0.301311	1.06974
15	62100001	62150000	CCDC73	0.206471	1.25515
15	62375001	62425000	QSER1	0.206009	1.05883
15	63450001	63500000	CAPRIN1	0.223047	0.662727
15	64475001	64525000	CD44	0.231081	0.940016
15	64500001	64550000	CD44	0.198426	1.10409
15	65450001	65500000	LDLRAD3	0.297086	0.830892
15	65525001	65575000	LDLRAD3	0.200863	0.712542
15	78125001	78175000	LOC101115065	0.21772	0.80167
15	79300001	79350000	TNKS1BP1	0.217477	0.788373
15	80975001	81025000	DTX4	0.205688	0.660672
15	9650001	9700000	CNTN5	0.233862	0.669222
15	9675001	9725000	CNTN5	0.237015	0.878928
15	9700001	9750000	CNTN5	0.208004	0.786629
16	13000001	13050000	MAST4	0.229996	0.988816
16	18550001	18600000	ERCC8	0.248181	0.858663
16	20975001	21025000	GAPT	0.264066	0.659148
16	21000001	21050000	PLK2	0.28134	0.742377
16	21025001	21075000	PLK2	0.214276	1.13352
16	21050001	21100000	LOC114118794	0.201496	1.42
16	23400001	23450000	IL31RA	0.246652	0.748718
16	23600001	23650000	SLC38A9	0.196475	0.726911
16	23625001	23675000	SLC38A9	0.196652	0.665356
16	24200001	24250000	LOC101117107	0.219894	0.747846
16	24225001	24275000	LOC101117107	0.240544	0.889372
16	2875001	2925000	GABRP	0.245865	0.813512
16	33825001	33875000	PRKAA1	0.222698	1.7226
16	41375001	41425000	ZFR	0.213592	0.746417
16	45325001	45375000	TRNAY-GUA	0.291976	0.659782
16	7225001	7275000	LOC132657972	0.216876	0.998666
16	7250001	7300000	LOC132657973	0.204377	0.867361
17	14225001	14275000	LOC121816918	0.238581	0.978977
17	19450001	19500000	SLC7A11	0.224044	0.699098
17	44100001	44150000	ZNF84	0.335148	0.785509
17	44125001	44175000	ZNF84	0.331188	0.777634
17	56225001	56275000	SRRM4	0.212265	0.642537
17	57675001	57725000	KSR2	0.206783	0.743162
17	57700001	57750000	KSR2	0.199183	0.69642
17	58375001	58425000	LOC121816951	0.241671	0.691446
17	58400001	58450000	LOC121816951	0.280051	0.988974
17	58425001	58475000	LOC121816951	0.266605	1.15528
17	58450001	58500000	LOC121816951	0.249596	0.964684
17	60275001	60325000	TBX5	0.233352	1.39733
17	61725001	61775000	RPH3A	0.204644	1.11073
17	63075001	63125000	ACADS	0.224218	0.845107
17	63300001	63350000	HNF1A	0.275428	0.908496
17	63325001	63375000	C17H12orf43	0.320568	0.646857
17	63350001	63400000	LOC114118899	0.279665	0.755002
17	63375001	63425000	ANKRD13A	0.232376	0.795778
17	65325001	65375000	KIAA1671	0.19686	0.690104
17	65550001	65600000	GRK3	0.223901	0.665263
17	67625001	67675000	TTC28	0.209769	1.99177
17	67650001	67700000	TTC28	0.197967	1.32446
17	68500001	68550000	EMID1	0.256707	0.74996
17	68675001	68725000	THOC5	0.225681	0.703788
17	68700001	68750000	NIPSNAP1	0.196143	0.721564
17	68775001	68825000	NF2	0.201216	0.677671
17	69225001	69275000	LIF	0.197248	0.950877
17	69275001	69325000	TBC1D10A	0.20652	1.24547
17	69300001	69350000	TBC1D10A	0.21456	1.40505
17	69325001	69375000	TBC1D10A	0.212296	0.96978
17	69350001	69400000	SEC14L2	0.20087	0.782704
17	72250001	72300000	PI4KA	0.201306	0.713901
17	72975001	73025000	DGCR8	0.260615	0.683947
17	73000001	73050000	DGCR8	0.273098	0.799972
18	42300001	42350000	LOC105603181	0.200351	0.902204
18	43375001	43425000	LOC114109112	0.218953	0.777495
18	65800001	65850000	MARK3	0.208875	0.694892
18	67150001	67200000	GPR132	0.225781	0.690654
18	67175001	67225000	GPR132	0.225353	0.930195
18	67200001	67250000	JAG2	0.203764	0.975559
18	67225001	67275000	NUDT14	0.221136	0.642369
19	11500001	11550000	DLEC1	0.248528	0.737634
19	11525001	11575000	DLEC1	0.308677	0.671024
19	13975001	14025000	ULK4	0.197067	0.688931
19	16075001	16125000	LOC132658172	0.196892	0.673022
19	23875001	23925000	LOC114108678	0.288379	0.68534
19	23900001	23950000	LOC114108678	0.26871	0.733606
19	23925001	23975000	LOC114108678	0.197022	0.957608
19	24850001	24900000	LOC114115470	0.210023	0.704097
19	2900001	2950000	ZCWPW2	0.218185	0.853582
19	2925001	2975000	LOC132658165	0.198745	0.924041
19	40850001	40900000	FHIT	0.215014	1.41003
19	40875001	40925000	FHIT	0.209073	0.98311
19	40900001	40950000	FHIT	0.210004	0.797331
19	56850001	56900000	TIMP4	0.216978	2.02217
19	59050001	59100000	RAB7A	0.279987	0.789718
19	59075001	59125000	RAB7A	0.219608	0.835234
19	59175001	59225000	RPN1	0.219927	0.863551
19	59200001	59250000	LOC132658223	0.220922	0.846477
19	59225001	59275000	EEFSEC	0.199693	0.782252
19	59250001	59300000	EEFSEC	0.273918	0.758335
19	59275001	59325000	EEFSEC	0.285353	0.644759
19	59300001	59350000	EEFSEC	0.256222	0.831655
19	59325001	59375000	EEFSEC	0.276439	1.36629
19	59350001	59400000	EEFSEC	0.248809	1.02099
19	59375001	59425000	EEFSEC	0.197633	0.758613
19	59400001	59450000	LOC132658196	0.23345	0.740344
19	59425001	59475000	KBTBD12	0.242509	0.794393
19	59450001	59500000	KBTBD12	0.266375	0.766111
19	59475001	59525000	KBTBD12	0.294054	0.713787
19	60125001	60175000	PLXNA1	0.230317	0.766778
19	60150001	60200000	PLXNA1	0.26834	1.04418
19	60175001	60225000	PLXNA1	0.21465	0.970361
19	60200001	60250000	CHCHD6	0.26571	1.0941
19	60225001	60275000	CHCHD6	0.273242	1.26296
19	60250001	60300000	LOC132658159	0.257977	1.32728
19	60275001	60325000	TXNRD3	0.242322	1.14232
19	60300001	60350000	UROC1	0.226034	0.914574
19	60325001	60375000	UROC1	0.202022	0.765288
19	7350001	7400000	GLB1	0.2133	0.785194
19	7450001	7500000	CRTAP	0.203101	0.711489
19	7475001	7525000	CRTAP	0.202723	0.767633
20	18525001	18575000	RUNX2	0.221423	1.07298
20	18550001	18600000	RUNX2	0.228315	1.27141
20	30525001	30575000	LOC121817403	0.235447	0.794882
20	48850001	48900000	LOC105603901	0.31996	1.22834
20	49575001	49625000	SLC22A23	0.264659	0.674271
20	49600001	49650000	LOC132658277	0.268696	0.775819
21	21125001	21175000	NELL1	0.29127	1.09731
21	21150001	21200000	NELL1	0.194613	0.963371
21	22275001	22325000	DBX1	0.227006	0.965404
21	2350001	2400000	FAT3	0.253902	0.904297
21	24650001	24700000	LOC101102436	0.203567	1.61143
21	36325001	36375000	VWCE	0.218803	0.8272
21	36350001	36400000	DDB1	0.36747	2.22649
21	37950001	38000000	LOC101118318	0.236784	0.839758
21	37975001	38025000	LOC101118318	0.234568	0.685558
21	38075001	38125000	LOC114110035	0.22291	1.04735
21	38100001	38150000	LOC114110035	0.22573	0.869601
21	38575001	38625000	SPINDOC	0.218379	0.825434
21	40925001	40975000	DPP3	0.278695	0.998
21	40950001	41000000	BBS1	0.287272	0.84521
21	40975001	41025000	CTSF	0.217547	0.897058
21	41075001	41125000	RBM4	0.297378	0.835031
21	41800001	41850000	LOC105607169	0.223362	0.669106
21	41925001	41975000	ALDH3B1	0.204223	0.771438
21	41950001	42000000	ALDH3B1	0.229815	0.892473
21	42175001	42225000	LRP5	0.22312	0.937188
21	42200001	42250000	LRP5	0.220706	0.755056
21	42250001	42300000	LRP5	0.200979	0.701797
21	42275001	42325000	LRP5	0.22762	0.67156
21	42300001	42350000	PPP6R3	0.199021	0.642714
21	42575001	42625000	CPT1A	0.205096	0.900446
21	42650001	42700000	IGHMBP2	0.213544	0.698541
21	42675001	42725000	IGHMBP2	0.240521	0.837182
21	42700001	42750000	MRGPRF	0.236019	0.999964
21	42725001	42775000	TPCN2	0.238864	0.833011
21	43600001	43650000	ANO1	0.269938	0.90104
21	43625001	43675000	ANO1	0.274847	1.08211
21	45125001	45175000	KCNQ1	0.231451	0.71905
21	45150001	45200000	KCNQ1	0.221738	0.84459
21	46325001	46375000	DUSP8	0.244325	0.654783
21	46625001	46675000	MUC5AC	0.213066	0.735215
21	47125001	47175000	RNH1	0.195521	0.807567
23	31850001	31900000	ZNF521	0.195392	0.875056
23	31875001	31925000	ZNF521	0.201323	0.959738
24	25400001	25450000	IL4R	0.218671	1.36821
24	25425001	25475000	IL4R	0.210079	0.846139
24	32450001	32500000	LOC121817872	0.235168	0.858203
24	32475001	32525000	LOC121817872	0.23736	0.797341
24	34375001	34425000	HIP1	0.195557	1.0625
24	34500001	34550000	LOC132658582	0.21918	1.37239
24	3625001	3675000	CREBBP	0.252073	1.22541
24	37000001	37050000	LOC101110202	0.196572	0.959145
24	3975001	4025000	TFAP4	0.195757	0.772739
24	4000001	4050000	TFAP4	0.252087	0.718505
24	4050001	4100000	GLIS2	0.291214	0.751169
24	40850001	40900000	CARD11	0.318734	1.01256
24	40875001	40925000	CARD11	0.321623	1.08757
24	42175001	42225000	LOC121817889	0.199803	0.90667
24	9325001	9375000	GRIN2A	0.217843	0.639649
25	16975001	17025000	CABCOCO1	0.232068	0.797462
25	17000001	17050000	CABCOCO1	0.336638	0.84264
25	18525001	18575000	JMJD1C	0.210389	1.45316
25	18675001	18725000	JMJD1C	0.203903	1.42632
25	24075001	24125000	SLC25A16	0.200143	1.61947
25	24100001	24150000	TET1	0.226046	1.58478
25	24125001	24175000	TET1	0.257474	1.61193
25	24150001	24200000	TET1	0.234107	1.02083
25	29375001	29425000	ADK	0.210574	0.675754
25	29400001	29450000	ADK	0.198382	0.668051
25	34100001	34150000	ZMIZ1	0.194941	0.685854
25	6775001	6825000	IRF2BP2	0.196144	2.00239
25	6800001	6850000	LOC121817978	0.2452	1.93409
25	6825001	6875000	LOC121817978	0.235336	2.08631
25	6925001	6975000	LOC132658675	0.206699	2.068
25	7000001	7050000	LOC132658655	0.19899	1.08248
25	7375001	7425000	ARID4B	0.244341	0.669153
25	7400001	7450000	ARID4B	0.271511	0.975997
25	8150001	8200000	NID1	0.195856	1.08125
25	8175001	8225000	GPR137B	0.225932	0.992806
25	8200001	8250000	GPR137B	0.250192	0.878581
25	8225001	8275000	GPR137B	0.25469	0.805787
25	8250001	8300000	GPR137B	0.238551	0.824725
26	15975001	16025000	LOC106990546	0.206312	1.01826
26	20575001	20625000	TUSC3	0.242789	0.960028
26	20600001	20650000	TUSC3	0.232763	1.43766
26	23425001	23475000	LONRF1	0.23744	0.797316
26	27575001	27625000	NRG1	0.199948	0.74077
26	36425001	36475000	IKBKB	0.196755	0.858822
26	37000001	37050000	HOOK3	0.241651	0.763809
26	37025001	37075000	POMK	0.201151	0.92908
26	39575001	39625000	RARB	0.266461	0.678812
26	6400001	6450000	LOC121818087	0.254184	1.11857
26	9125001	9175000	LOC114111096	0.204317	0.9704
26	9550001	9600000	LOC114111107	0.221425	0.706522

[truncated: 10 more sheets: Table S11, Table S12, Table S13, Table S14, Table S15, Table S16, Table S17, Table S18, Table S19, Table S20]
